# Supplementary material for: Hydrogen sulfide sensing using an aurone-based fluorescent probe
Source: Royal Society of Chemistry journal article supplement (doi:10.1039/d0ra08802a), 2020-01-01

## SUPPORTING INFORMATION

### Hydrogen Sulfide Sensing Using an Aurone-based Fluorescent Probe

Arjun Kafle,<sup>a</sup> Shrijana Bhattarai,<sup>a</sup> Justin M. Miller<sup>ab</sup> and Scott T. Handy\*<sup>ab</sup>

<sup>a</sup>*Molecular Biosciences Program, Middle Tennessee State University, Murfreesboro, TN 37132*

<sup>b</sup>*Department of Chemistry, Middle Tennessee State University, Murfreesboro, TN 37132*

#### Table of Contents

|                                                                                          |    |
|------------------------------------------------------------------------------------------|----|
| Materials and methods .....                                                              | 1  |
| General procedure for the synthesis of 4'-azido benzaldehyde derivatives (4) .....       | 1  |
| General procedure for the synthesis of aurones ( <b>6a-g</b> ) .....                     | 1  |
| General procedure for the synthesis of amino derivatives ( <b>7a-g</b> ) .....           | 2  |
| Characterization data.....                                                               | 2  |
| References .....                                                                         | 6  |
| UV-visible absorption and emission spectra.....                                          | 7  |
| Effect of pH on spectral properties of <b>6g</b> and <b>7g</b> .....                     | 7  |
| Determination of detection limit .....                                                   | 8  |
| Reaction kinetics study .....                                                            | 10 |
| Selectivity study .....                                                                  | 10 |
| Figure S1. UV-visible spectra illustrating spectral Overlap .....                        | 11 |
| Figure S2. Effects of pH on <b>6g/7g</b> spectral properties. ....                       | 12 |
| Figure S3. Effects of CTAB on fluorescence intensity of <b>6g/7g</b> at various pH ..... | 13 |
| Spectra for aurones ( <b>6a-g</b> , <b>7a-g</b> ).....                                   | 14 |

## **Materials and methods**

ACS grade chemicals and solvents used as received without further purification. All the reactions were conducted under an air atmosphere.  $^1\text{H}$  and  $^{13}\text{C}$  NMR spectra were recorded on a JEOL AS (500 and 300 MHz) NMR instrument and chemical shifts were recorded in ppm with reference to the tetramethyl silane (TMS) chloroform-*d* or DMSO-*d*<sub>6</sub>.<sup>1</sup> The following conventions are used for multiplicities: *s*, singlet; *d*, doublet; *t*, triplet; *m*, multiplet; *dd*, doublet of doublet; *dt*, doublet of triplet; *ddd*, doublet of doublet of doublet; *br*, broad. A Cary 630 FT-IR (Agilent Technologies) was used to collect IR spectra. Solid samples were used for collecting the IR-spectra. Fluorescence spectra were collected using a Hitachi F-4500 fluorescence spectrophotometer (Hitachi, Japan) with the slit width for excitation and emission set at 5 nm and photomultiplier voltage set at 700v. Excitation wavelength details are provided in-text as relevant. An HP-8452A Diode Array Spectrophotometer (Agilent Technologies Inc.) was used to record UV-visible absorption spectra. The reactions were monitored by Thin Layer Chromatography (TLC) on aluminum supported silica coated plates (Sorbent Technologies, Inc.). All extracts were concentrated under reduced pressure using a Buchi Rotary Evaporator. Products were purified by flash silica gel (32-63u) column chromatography.

### **General procedure for the synthesis of 4'-azido benzaldehyde derivatives (4)**

In a 3-dram glass vial containing a magnetic stir bar, 1.0 mmol of fluorinated aromatic aldehyde and 1.5 mmol (1.5 equivalent) of sodium azide ( $\text{NaN}_3$ ) were dissolved in 2 mL of dimethylsulfoxide (DMSO) and heated for 2-3 h at 70-90 °C (70 °C for multi-fluorosubstituted) in a sand bath. After the completion of the reaction, it was diluted with DI water and extracted with ethylacetate ( $\times 4$ ). To remove residual DMSO the organic fraction was further washed with DI water and brine followed by drying over anhydrous  $\text{MgSO}_4$ . The organic fraction was concentrated *in vacuo* and purified by flash column chromatography using 2-10% ethyl acetate: hexane to obtain the desired 4'-azido benzaldehydes.

### **General procedure for the synthesis of aurones (6a-6g)**

In a 3-dram glass vial, benzofuranone (1 equivalent) was dissolved in 5 mL of glacial acetic acid containing a magnetic stir bar. To this solution 4'-azidobenzaldehyde (1.5 equivalent) and 2-3 drops (0.2 mL) of concentrated HCl were added and stirred at room temperature for up to 3 hours. In most

cases the reaction afforded a precipitate, normally after 30 min, indicating completion of the reaction. After the reaction was complete, it was poured into ice cold DI water. The precipitate obtained was filtered and the residue was washed multiple times with water and allowed to air dry. No further purification was required. For some of the auronones which did not precipitate out efficiently, the water diluted reaction mixture was neutralized with saturated NaHCO<sub>3</sub> and extracted with ethyl acetate, concentrated under reduced pressure using a Rotary Evaporator and purified by flash column chromatography.

### **General procedure for the synthesis of amino derivatives (7a-7g)**

For the synthesis of the corresponding amines (**7a-7g**) of the probe candidates, 1 equivalent of the aurone (**6a-6g**) was mixed with an excess of NaHS (4 equivalents) in a 1-dram glass vial containing a magnetic stir bar. To the mixture, 1.5 mL of MeCN with a few drops of DI H<sub>2</sub>O was added and stirred for 30 minutes (acetone can also be used as a solvent). The solution turned bright red. Once the reaction was complete based on the TLC, the mixture was concentrated under vacuum and subjected to flash column chromatography (eluted with 5% MeOH: DCM).

### **Characterization data**

**(Z)-2-(4-azidobenzylidene)benzofuran-3(2H)-one (6a):** Reaction scale (1.80 mmol), Yield: 70% (331 mg); yellow solid, mp 128-129 °C. <sup>1</sup>H NMR (500 MHz, CDCl<sub>3</sub>) δ 7.92 (d, *J* = 8.5 Hz, 2H), 7.81 (d, *J* = 7.5 Hz, 1H), 7.66 (t, *J* = 7.5 Hz, 1H), 7.33 (d, *J* = 8.0 Hz, 1H), 7.23 (t, *J* = 7.4 Hz, 1H), 7.10 (d, *J* = 8.5 Hz, 2H), 6.85 (s, 1H). <sup>13</sup>C NMR (125 MHz, CDCl<sub>3</sub>) δ 184.7, 166.1, 146.8, 141.6, 137.0, 133.2, 129.3, 124.8, 123.7, 121.8, 119.7, 113.0, 112.2. IR (neat) 2121, 1704, 1655, 1596, 1508, 1302, 1186, 1108, 829, 750 cm<sup>-1</sup>.

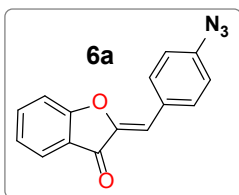

**(Z)-2-(4-aminobenzylidene)benzofuran-3(2H)-one (7a):** Reaction scale (0.114 mmol), Yield: 94% (25.4 mg); orange red solid, mp 173-175 °C. <sup>1</sup>H NMR (500 MHz, CDCl<sub>3</sub>) δ 7.80 (d, *J* = 8.5 Hz, 1H), 7.77 (d, *J* = 8.5 Hz, 2H), 7.61 (ddd, *J* = 8.5, 7.0, 1.0 Hz, 1H), 7.31 (d, *J* = 8.0 Hz, 1H), 7.19 (t, *J* = 7.5 Hz, 1H), 6.87 (s, 1H), 6.72 (d, *J* = 8.5 Hz, 2H), 4.09 (s, 2H). <sup>13</sup>C NMR (125 MHz, CDCl<sub>3</sub>) δ 184.4, 165.6, 148.7, 145.4, 136.3, 133.9, 124.5, 123.2, 122.5, 122.3, 115.1, 114.8, 112.9. IR (neat)

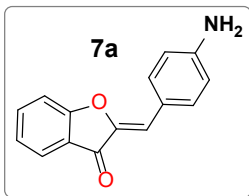

3439, 3312, 3216, 1683, 1577, 1518, 1488, 1302, 1182, 1100, 832, 754  $\text{cm}^{-1}$ . HRMS (EI):  $m/z$  [ $M + H$ ] calcd for  $\text{C}_{15}\text{H}_{12}\text{NO}_2$  238.0868, found 238.0871.

**(Z)-2-(4-azidobenzylidene)-6-hydroxybenzofuran-3(2H)-one (6b):** Reaction scale (0.114 mmol),

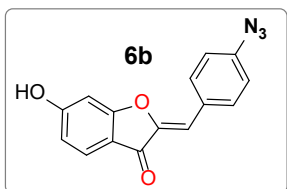

Yield: 94% (25.4 mg); faint orange red solid, mp 194-196 °C.  $^1\text{H}$  NMR (500 MHz, DMSO- $\text{D}_6$ )  $\delta$  11.23 (s, 1H), 7.99 (d,  $J = 8.5$  Hz, 2H), 7.63 (d,  $J = 8.5$  Hz, 1H), 7.24 (d,  $J = 8.5$  Hz, 2H), 6.81 (s, 1H), 6.79 (d,  $J = 2.0$  Hz, 1H), 6.72 (dd,  $J = 8.5, 2.0$  Hz, 1H).  $^{13}\text{C}$  NMR (125 MHz, DMSO- $\text{D}_6$ )  $\delta$  181.2, 167.8, 166.5, 147.1, 140.5, 132.7, 128.9, 125.9, 119.6, 113.0, 112.8, 109.5, 98.6. IR (neat) 3074-2600 (br), 2117, 1681, 1577, 1506, 1458, 1294, 1112, 825  $\text{cm}^{-1}$ .

**(Z)-2-(4-aminobenzylidene)-6-hydroxybenzofuran-3(2H)-one (7b):** Reaction scale (0.11 mmol),

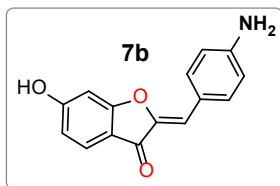

Yield: 92% (25.6 mg); orange red solid, mp > 260 °C.  $^1\text{H}$  NMR (500 MHz, DMSO- $\text{D}_6$ )  $\delta$  11.00 (s, 1H), 7.66 (d,  $J = 8.5$  Hz, 2H), 7.57 (d,  $J = 8.5$  Hz, 1H), 6.77 (d,  $J = 2.0$  Hz, 1H), 6.69 (dd,  $J = 8.5, 2.0$  Hz, 1H), 6.65 (s, 1H), 6.64 (d,  $J = 9.0$  Hz, 3H), 5.94 (s, 2H).  $^{13}\text{C}$  NMR (125 MHz, DMSO- $\text{D}_6$ )  $\delta$  180.7, 166.9, 165.6, 151.1, 144.5, 133.3, 125.3, 119.0, 113.8, 113.6, 112.9, 112.5, 98.4. IR (neat) 3461, 3361, 3300-2500 (br), 1666, 1629, 1551, 1454, 1287, 1108, 821  $\text{cm}^{-1}$ . HRMS (EI):  $m/z$  [ $M + H$ ] calcd for  $\text{C}_{15}\text{H}_{12}\text{NO}_3$  254.0817, found 254.0813.

**(Z)-2-(4-azidobenzylidene)-4-hydroxybenzofuran-3(2H)-one (6c):** Reaction scale (0.30 mmol),

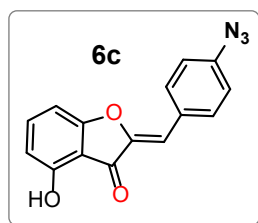

Yield: 90% (75 mg); red solid, mp 179-181 °C.  $^1\text{H}$  NMR (500 MHz, DMSO- $\text{D}_6$ )  $\delta$  11.16 (s, 1H), 7.98 (d,  $J = 8.5$  Hz, 2H), 7.54 (t,  $J = 8.0$  Hz, 1H), 7.23 (d,  $J = 8.5$  Hz, 2H), 6.85 (d,  $J = 8.0$  Hz, 1H), 6.77 (s, 1H), 6.64 (d,  $J = 8.5$  Hz, 1H).  $^{13}\text{C}$  NMR (76 MHz, DMSO- $\text{D}_6$ )  $\delta$  181.2, 165.9, 157.2, 146.31, 140.5, 138.7, 132.7, 129.1, 119.7, 110.7, 109.2, 109.1, 102.4. IR (neat) 3283, 2125, 2028, 1693, 1652, 1592, 1458, 1316, 1134, 769  $\text{cm}^{-1}$ .

**(Z)-2-(4-aminobenzylidene)-4-hydroxybenzofuran-3(2H)-one (7c):** Reaction scale (24 mg, 0.083

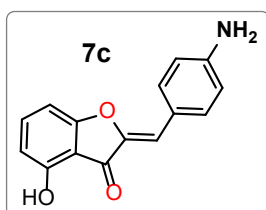

mmol), Yield: 92% (20 mg); red solid, mp >260 °C.  $^1\text{H}$  NMR (300 MHz, DMSO- $\text{D}_6$ )  $\delta$  7.54 (d,  $J = 8.5$  Hz, 2H), 6.99 (dd,  $J = 8.5, 7.5$  Hz, 1H), 6.60 (d,  $J = 8.5$  Hz, 2H), 6.25 (s, 1H), 5.86 (d,  $J = 9.0$  Hz, 1H), 5.79 (d,  $J = 7.5$  Hz, 1H), 5.63 (s, 2H).  $^{13}\text{C}$  NMR (75 MHz, DMSO- $\text{D}_6$ )  $\delta$  182.1, 173.9,

165.9, 149.7, 145.9, 136.4, 131.9, 120.4, 117.7, 113.8, 110.7, 107.5, 89.3. IR (neat) 3394-3275 (br), 1674, 1592, 1561, 1477, 1376, 1235, 1127, 1004, 803  $\text{cm}^{-1}$ . HRMS (EI):  $m/z$  [M + H] calcd for  $\text{C}_{15}\text{H}_{12}\text{NO}_3$  254.0817, found 254.0819.

**(Z)-2-(4-azido-3-fluorobenzylidene)-6-hydroxybenzofuran-3(2H)-one (6d):** Reaction scale (0.27

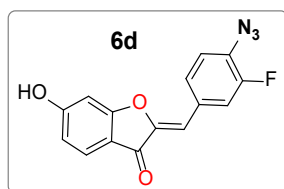

mmol), Yield: 76% (61 mg); red solid, mp 156 °C (decompose).  $^1\text{H}$  NMR (500 MHz, DMSO- $\text{D}_6$ )  $\delta$  11.24 (s, 1H), 7.80 (d,  $J = 12.6$  Hz, 1H), 7.75 (d,  $J = 8.6$  Hz, 1H), 7.59 (d,  $J = 8.3$  Hz, 1H), 7.34 (t,  $J = 8.6$  Hz, 1H), 6.78 (d,  $J = 1.8$  Hz, 1H), 6.73 (s, 1H), 6.71 (dd,  $J = 8.3, 1.8$  Hz, 1H).  $^{13}\text{C}$  NMR (75 MHz, DMSO- $\text{D}_6$ )  $\delta$  181.2, 167.9, 166.7, 153.5 (d,  $^1J_{\text{C-F}} = 247.3$  Hz), 147.6, 130.3 (d,  $^2J_{\text{C-F}} = 7.5$  Hz), 128.3 (d,  $^3J_{\text{C-F}} = 3.5$  Hz), 128.2, 126.0, 121.8, 118.30 (d,  $^2J_{\text{C-F}} = 20.1$  Hz), 113.8, 112.6, 108.43 (d,  $^3J_{\text{C-F}} = 2.4$  Hz), 98.7. IR (neat) 3074-2653 (br), 2136, 2106, 1685, 1573, 1462, 1298, 1119, 851  $\text{cm}^{-1}$ .

**(Z)-2-(4-amino-3-fluorobenzylidene)-6-hydroxybenzofuran-3(2H)-one (7d):** Reaction scale

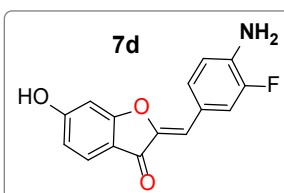

(21.5 mg, 0.069 mmol), Yield: 98% (18.4 mg); orange solid, mp >260 °C.  $^1\text{H}$  NMR (500 MHz, DMSO- $\text{D}_6$ )  $\delta$  7.64 (d,  $J = 12.0$  Hz, 1H), 7.58 (dd,  $J = 8.0, 3.0$  Hz, 1H), 7.50 (d,  $J = 8.0$  Hz, 1H), 6.86 – 6.76 (m, 2H), 6.70–6.68 (m, 2H), 5.96 (s, 2H).  $^{13}\text{C}$  NMR (125 MHz, DMSO- $\text{D}_6$ )  $\delta$  180.8, 167.2, 166.0, 149.8 (d,  $^1J_{\text{C-F}} = 237.2$  Hz), 145.3, 138.9 (d,  $^2J_{\text{C-F}} = 12.8$  Hz), 129.1, 125.5, 119.5 (d,  $^3J_{\text{C-F}} = 7.0$  Hz), 117.25 (d,  $^2J_{\text{C-F}} = 18.8$  Hz), 115.7, 113.2, 112.8, 111.5, 98.5. IR (neat) 3478, 3372, 3041-2586 (br), 1674, 1566, 1521, 1454, 1294, 1112, 999  $\text{cm}^{-1}$ . HRMS (EI):  $m/z$  [M + H] calcd for  $\text{C}_{15}\text{H}_{11}\text{FNO}_3$  272.07230, found 272.07228.

**(Z)-2-(4-azido-3, 5-difluorobenzylidene)-6-hydroxybenzofuran-3(2H)-one (6e):** Reaction scale

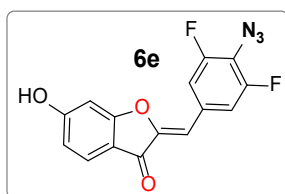

(0.33 mmol), Yield: 76% (79.3 mg); yellow solid, mp 165 °C (decompose).  $^1\text{H}$  NMR (500 MHz, DMSO- $\text{D}_6$ )  $\delta$  11.30 (s, 1H), 7.72 (d,  $J = 9.5$  Hz, 2H), 7.61 (d,  $J = 8.5$  Hz, 1H), 6.83 (s, 1H), 6.74 (s, 1H), 6.72 (dd,  $J = 8.5, 2.0$  Hz, 1H).  $^{13}\text{C}$  NMR (125 MHz, DMSO- $\text{D}_6$ )  $\delta$  181.0, 167.9, 166.8, 154.7 (d,  $^1J_{\text{C-F}} = 247.5$  Hz), 148.0, 129.6 (t,  $^2J_{\text{C-F}} = 10.1$  Hz), 125.9, 116.0, 114.3 (d,  $^2J_{\text{C-F}} = 19.6$  Hz), 113.2, 112.3, 107.3, 98.8. IR (neat) 3078, 2117, 1685, 1577, 1506, 1458, 1279, 1138, 1112, 1045, 832  $\text{cm}^{-1}$ .

**(Z)-2-(4-amino-3, 5-difluorobenzylidene)-6-hydroxybenzofuran-3(2H)-one (7e):** Reaction scale

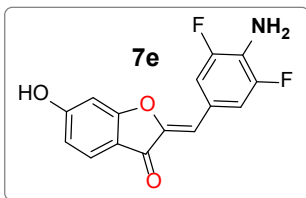

(31 mg, 0.098 mmol), Yield: 80% (22.7 mg); orange solid, mp >260 °C.

<sup>1</sup>H NMR (300 MHz, DMSO-D<sub>6</sub>) δ 7.62 – 7.49 (m, 3H), 6.81 (d, *J* = 2.0 Hz, 1H), 6.71 (s, 1H), 6.69 (dd, *J* = 7.5, 2.5 Hz, 1H), 6.00 (s, 1H). <sup>13</sup>C NMR (75 MHz, DMSO-D<sub>6</sub>) δ 180.9, 167.4, 150.4 (dd, *J*<sub>C-F</sub> = 238.8, 10.0 Hz), 146.0, 128.0 (t, *J*<sub>C-F</sub> = 16.5 Hz), 125.7, 117.85 (t, *J*<sub>C-F</sub> = 9.1 Hz),

113.95 (d, *J*<sub>C-F</sub> = 13.3 Hz), 113.9, 113.8, 113.0, 110.4, 98.7. IR (neat) 3469, 3368, 1678, 1581, 1532, 1454, 1324, 1287, 1115, 821, 769 cm<sup>-1</sup>. HRMS (EI): *m/z* [M + H] calcd for C<sub>15</sub>H<sub>11</sub>FNO<sub>3</sub> 272.07230, found 272.08226.

**(Z)-2-(4-azido-3,5-difluorobenzylidene)-4-hydroxybenzofuran-3(2H)-one (6f):** Reaction scale

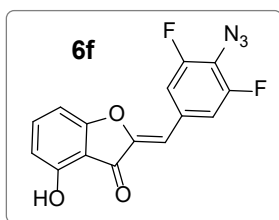

(0.36 mmol), Yield: 70% (80 mg); yellow solid, mp 165-170 °C. <sup>1</sup>H NMR

(300 MHz, DMSO-D<sub>6</sub>) δ 11.27 (s, 1H), 7.75 (d, *J* = 10.0 Hz, 2H), 7.56 (t, *J* = 8.0 Hz, 1H), 6.92 (d, *J* = 8.0 Hz, 1H), 6.76 (s, 1H), 6.65 (d, *J* = 8.0 Hz, 1H). <sup>13</sup>C NMR (125 MHz, DMSO-D<sub>6</sub>) δ 180.9, 165.8, 157.2, 154.9 (d, <sup>1</sup>*J*<sub>C-F</sub> = 245.9, 4.6 Hz), 147.2, 138.9, 129.68 (t, <sup>3</sup>*J*<sub>C-F</sub> = 9.8 Hz), 117.32 (t, <sup>2</sup>*J*<sub>C-F</sub>

= 14.0 Hz), 114.22 (dd, <sup>2</sup>*J*<sub>C-F</sub> = 19.2, 4.7 Hz), 111.0, 108.6, 106.8, 102.5. IR (neat) 3379, 2121, 1696, 1607, 1495, 1339, 1305, 1179, 1041, 799 cm<sup>-1</sup>.

**(Z)-2-(4-amino-3,5-difluorobenzylidene)-4-hydroxybenzofuran-3(2H)-one (7f):** Reaction scale

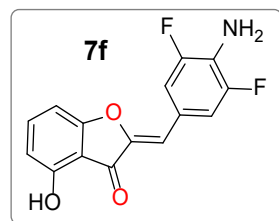

(13 mg, 0.041 mmol), Yield: 84% (10 mg); red solid, mp 222-225 °C. <sup>1</sup>H

NMR (500 MHz, DMSO-D<sub>6</sub>) δ 7.44 (dd, *J* = 8.0, 2.1 Hz, 2H), 7.08 (t, *J* = 8.0 Hz, 1H), 6.33 (s, 1H), 6.00 (d, *J* = 8.0 Hz, 2H), 5.74 (s, 2H). <sup>13</sup>C NMR (125 MHz, DMSO-D<sub>6</sub>) δ 181.2, 165.8, 150.6 (dd, <sup>1</sup>*J*<sub>C-F</sub> = 238.4, 9.8 Hz), 149.6 (d, *J*<sub>C-F</sub> = 10.4), 147.4, 136.6, 126.3 (t, <sup>2</sup>*J*<sub>C-F</sub> = 11.2 Hz), 119.5, 112.7

(d, <sup>2</sup>*J*<sub>C-F</sub> = 16.7 Hz), 109.9, 104.9, 104.8, 104.7. IR (neat) 3346, 1689, 1596, 1566, 1566, 1480, 1354, 1235, 1115, 1000, 803 cm<sup>-1</sup>. HRMS (EI): *m/z* [M + H] calcd for C<sub>15</sub>H<sub>10</sub>F<sub>2</sub>NO<sub>3</sub> 290.06288, found 290.06290.

**(Z)-2-(4-azidobenzylidene)-5-fluorobenzofuran-3(2H)-one (6g):** Reaction scale (0.40 mmol),

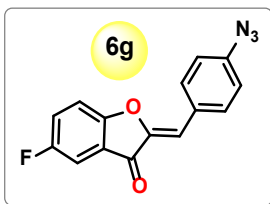

Yield: 80% (90 mg); yellow solid, mp 137-138 °C.  $^1\text{H}$  NMR (500 MHz,  $\text{CDCl}_3$ )  $\delta$  7.89 (d,  $J = 8.5$  Hz, 2H), 7.45 (dd,  $J = 7.0, 3.0$  Hz, 1H), 7.38 (td,  $J = 8.5, 3.0$  Hz, 1H), 7.29 (dd,  $J = 9.0, 3.5$  Hz, 1H), 7.10 (d,  $J = 9.0$  Hz, 2H), 6.85 (s, 1H).  $^{13}\text{C}$  NMR (125 MHz,  $\text{CDCl}_3$ )  $\delta$  183.9, 162.1, 159.02 (d,  $^1J_{\text{C-F}} = 244.7$  Hz), 147.4, 141.9, 133.3, 129.0, 124.4 (d,  $^2J_{\text{C-F}} = 26.1$  Hz),

122.5 (d,  $^3J_{\text{C-F}} = 8.0$  Hz), 119.7, 114.21 (d,  $^3J_{\text{C-F}} = 7.8$  Hz), 113.08, 110.36 (d,  $^2J_{\text{C-F}} = 24.3$  Hz). IR (neat) 2128, 1707, 1655, 1598, 1484, 1305, 1268, 1190, 892, 832  $\text{cm}^{-1}$ .

**(Z)-2-(4-aminobenzylidene)-5-fluorobenzofuran-3(2H)-one (7g):** Reaction scale (18 mg, 0.064

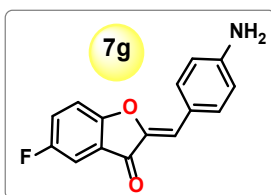

mmol), Yield: 73% (12 mg); red solid, mp 178-180 °C.  $^1\text{H}$  NMR (500 MHz,  $\text{DMSO-D}_6$ )  $\delta$  7.74 (d,  $J = 8.5$  Hz, 2H), 7.65 – 7.58 (m, 2H), 7.57 (dd,  $J = 7.0, 2.4$  Hz, 1H), 6.88 (s, 1H), 6.66 (d,  $J = 8.5$  Hz, 2H), 6.16 (s, 2H).  $^{13}\text{C}$  NMR (76 MHz,  $\text{DMSO-D}_6$ )  $\delta$  181.64, 160.5, 158.18 (d,  $^1J_{\text{C-F}} =$

240.9 Hz), 152.1, 144.3, 134.2, 123.7 (d,  $^2J_{\text{C-F}} = 26.0$  Hz), 122.6 (d,  $^3J_{\text{C-F}} = 8.0$  Hz), 118.7, 116.2, 114.72 (d,  $^3J_{\text{C-F}} = 8.1$  Hz), 113.9, 109.48 (d,  $^2J_{\text{C-F}} = 24.2$  Hz). IR (neat) 3420, 3320, 3216, 1689, 1633, 1562, 1514, 1480, 1272, 1156, 817, 762  $\text{cm}^{-1}$ . HRMS (EI):  $m/z$  [M + H] calcd for  $\text{C}_{15}\text{H}_{11}\text{FNO}_2$  256.0774, observed 256.0071.

## References

1. Gottlieb, H. E.; Kotlyar, V.; Nudelman, A. NMR Chemical Shifts of Common Laboratory Solvents as Trace Impurities. *J. Org. Chem.* **1997**, 62, 7512-7515.
2. Geissman, A. T.; Harborne, J. B. Anthochlor pigment. X. Aureusin and cernuoside. *J. Am. Chem. Soc.* **1955**, 77, 4622-4624.

### **UV-visible absorption and emission spectra**

The 10 mM stock solution of all the 4'-azidoaurones **6a-g** and corresponding amines **7a-g** were prepared in DMSO. Unless otherwise stated 1X, pH = 7.4 PBS was used for the preparation of samples. All the UV-absorption and emission spectra were collected using a 50  $\mu$ M solution of the compounds in different solvent systems (90% DMSO/10% PBS, 5% DMSO in PBS, and 0.5% DMSO in PBS) in the presence or absence of CTAB.

#### **Sample preparation for UV-Vis absorption**

- a) **50  $\mu$ M solution of **6g** and **7g** in 0.5% DMSO in PBS**  
15  $\mu$ L 10 mM stock solution of **6g** or **7g** in DMSO was diluted with 2985  $\mu$ L of PBS (1x pH = 7.4) in a 3 mL cuvette.
- b) **50  $\mu$ M solution of **6g** and **7g** in 5% DMSO in PBS**  
150  $\mu$ L 1.0 mM stock solution of **6g** or **7g** in DMSO was diluted with 2850  $\mu$ L of PBS (1x pH = 7.4) in a 3 mL cuvette.
- c) **50  $\mu$ M solution of **6g** and **7g** in 90% DMSO in PBS**  
150  $\mu$ L 1.0 mM stock solution of **6g** or **7g** in DMSO was diluted with 2550  $\mu$ L DMSO and 300 PBS (1x pH = 7.4) in a 3 mL cuvette.
- d) **50  $\mu$ M solution of **6g** v **7g** in 0.5% DMSO in PBS and 1mM CTAB (in PBS)**  
To a 15  $\mu$ L 10 mM **6g** and **7g**, 600  $\mu$ L of CTAB (5 mM stock solution in PBS) and 2385  $\mu$ L of PBS in a 3 mL cuvette.

Similarly, for collecting the emission spectra the 50  $\mu$ M solutions of **6g** and **7g** in a 1.5 mL cuvette were excited at their respective absorption maxima ( $\lambda_{max}$ ) obtained for the specific solvent condition e.g., **6g** and **7g** were excited at 405 and 460 nm respectively in 0.5% v/v DMSO in PBS with 1mM CTAB.

#### **Effect of pH on spectral properties of **6g** and **7g****

The effect of pH on the absorption and fluorescence behavior of probe **6g** and the corresponding amine **7g** in the presence or absence of 1 mM CTAB was studied. This study was done in 0.5% v/v DMSO in PBS (1X) solvent. For the study, five different PBS (1X) solutions of pH = 3, 4.8, 7.5, 9.15, and 11 were prepared by adjusting pH using a pH meter. Five different 10 mM stock solution of CTAB (pH = 3, 4.8, 7.5, 9.15, and 11) were prepared using the corresponding PBS (1X, pH = 3,



4.8, 7.5, 9.15, and 11) solutions. The UV-Vis absorption spectra of **6g** and **7g** were collected with and without the inclusion of 1mM CTAB in 0.5% v/v DMSO in PBS (1X) of the specific pH as described above.

#### Sample preparation (example)

1. 50  $\mu$ M solution of **6g** and **7g** in 0.5% DMSO in PBS (pH = 3) with 1mM CTAB

To a 15  $\mu$ L 10 mM stock solution of **6g** and **7g**, 600  $\mu$ L of CTAB (5 mM stock solution in PBS, pH =3) and 2385  $\mu$ L of PBS (pH = 3) were mixed in a 3 mL cuvette and excited at the corresponding  $\lambda_{max}$  to collect the emission spectra.

Similarly, the emission spectra of **6g** and **7g** at specific pH were collected by preparing and exciting their 50  $\mu$ M solution in a 1.5 mL cuvette at their corresponding absorption maxima ( $\lambda_{max}$ ).

#### Determination of detection limit

Using the stock solutions of **7g** the emission spectra of its various concentrations (0.1 - 50  $\mu$ M) were collected in either 0.5% v/v DMSO in PBS/ 1 mM CTAB or 90% v/v DMSO/ 10% v/v PBS (1X, pH 7.4) solvent systems. Each solution of **7g** (0.1, 0.5, 1, 2, 5, 10, 15, 20, 25, 30, 40 and 50  $\mu$ M) prepared in a particular solvent system in a 1.5 mL cuvette was excited at the 465 nm. For each concentration, at least three independent trials were performed. The corresponding emission intensity observed at 560 nm was then plotted as a function of [**7g**] to obtain the linear range of detection. This generated the calibration curve for each solvent condition revealing the useful working range of **7g**.

#### Sample preparation in 0.5% DMSO in PBS (1X, pH = 7.4) with 1mM CTAB)

a) 0.1  $\mu$ M **7g** in 0.5% DMSO in PBS with 1mM CTAB

In a cuvette containing 3.0  $\mu$ L of **7g** (50  $\mu$ M stock in DMSO), 4.5  $\mu$ L DMSO, 300  $\mu$ L CTAB (5 mM in PBS) were added and diluted to the final volume of 1500  $\mu$ L with PBS (1192.5  $\mu$ L, 1X, pH = 7.4 )

b) 0.5  $\mu$ M **7g** in 0.5% DMSO in PBS with 1mM CTAB

In a cuvette containing 7.5  $\mu$ L of **7g** (100  $\mu$ M stock in DMSO), 300  $\mu$ L CTAB (5 mM in PBS) were added and diluted to the final volume of 1500  $\mu$ L with PBS (1192.5  $\mu$ L)

c) 1.0  $\mu$ M **7g** in 0.5% DMSO in PBS with 1mM CTAB

In a cuvette containing 7.5  $\mu$ L of **7g** (200  $\mu$ M stock in DMSO), 300  $\mu$ L CTAB (5 mM in PBS) were added and diluted to the final volume of 1500  $\mu$ L with PBS (1192.5  $\mu$ L)

- d) 2.0  $\mu$ M 7g in 0.5% DMSO in PBS with 1mM CTAB  
In a cuvette containing 3.0  $\mu$ L of 7g (1 mM stock in DMSO), 4.5  $\mu$ L DMSO, 300  $\mu$ L CTAB (5 mM in PBS) were added and diluted to the final volume of 1500  $\mu$ L with PBS (1192.5  $\mu$ L)
- e) 5.0  $\mu$ M 7g in 0.5% DMSO in PBS with 1mM CTAB  
In a cuvette containing 7.5  $\mu$ L of 7g (1 mM stock in DMSO), 300  $\mu$ L CTAB (5 mM in PBS) were added and diluted to the final volume of 1500  $\mu$ L with PBS (1192.5  $\mu$ L)
- f) 10  $\mu$ M 7g in 0.5% DMSO in PBS with 1mM CTAB  
In a cuvette containing 3.0  $\mu$ L of 7g (5 mM stock in DMSO), 4.5  $\mu$ L DMSO, 300  $\mu$ L CTAB (5 mM in PBS) were added and diluted to the final volume of 1500  $\mu$ L with PBS (1192.5  $\mu$ L)
- g) 15  $\mu$ M 7g in 0.5% DMSO in PBS with 1mM CTAB  
In a cuvette containing 4.5  $\mu$ L of 7g (5 mM stock in DMSO), 3.0  $\mu$ L DMSO, 300  $\mu$ L CTAB (5 mM in PBS) were added and diluted to the final volume of 1500  $\mu$ L with PBS (1192.5  $\mu$ L)
- h) 20  $\mu$ M 7g in 0.5% DMSO in PBS with 1mM CTAB  
In a cuvette containing 3.0  $\mu$ L of 7g (10 mM stock in DMSO), 4.5  $\mu$ L DMSO, 300  $\mu$ L CTAB (5 mM in PBS) were added and diluted to the final volume of 1500  $\mu$ L with PBS (1192.5  $\mu$ L)
- i) 25  $\mu$ M 7g in 0.5% DMSO in PBS with 1mM CTAB  
In a cuvette containing 7.5  $\mu$ L of 7g (5 mM stock in DMSO), 300  $\mu$ L CTAB (5 mM in PBS) were added and diluted to the final volume of 1500  $\mu$ L with PBS (1192.5  $\mu$ L).
- j) 30  $\mu$ M 7g in 0.5% DMSO in PBS with 1mM CTAB  
In a cuvette containing 4.5  $\mu$ L of 7g (10 mM stock in DMSO), 3.0  $\mu$ L DMSO, 300  $\mu$ L CTAB (5 mM in PBS) were added and diluted to the final volume of 1500  $\mu$ L with PBS (1192.5  $\mu$ L).
- k) 40  $\mu$ M 7g in 0.5% DMSO in PBS with 1mM CTAB  
In a cuvette containing 6.0  $\mu$ L of 7g (10 mM stock in DMSO), 1.5  $\mu$ L DMSO, 300  $\mu$ L CTAB (5 mM in PBS) were added and diluted to the final volume of 1500  $\mu$ L with PBS (1192.5  $\mu$ L)

1) 50  $\mu$ M **7g** in 0.5% DMSO in PBS with 1mM CTAB

In a cuvette containing 7.5  $\mu$ L of **7g** (10 mM stock in DMSO), 300  $\mu$ L CTAB (5 mM in PBS) were added and diluted to the final volume of 1500  $\mu$ L with PBS (1192.5  $\mu$ L).

**Reaction kinetics study**

The time course reaction kinetics for the reduction of the azide (**6g**) to amine (**7g**) was performed by incubating 20  $\mu$ M **6g** with 100  $\mu$ M NaHS in either 0.5% v/v DMSO in PBS (1X, pH = 7.4) +/- 1 mM CTAB or 90% v/v DMSO/10% v/v PBS (1X, pH = 7.4) solvent systems. Samples were excited at 465 nm and emission spectra spanning from 480 to 700 nm were collected at 2-minute intervals.

**Sample preparation (solvent system 0.5% v/v DMSO in PBS (1X, pH = 7.4)/ 1 mM CTAB):**

In a cuvette, 3.0  $\mu$ L of **6g** (10 mM stock in DMSO) was added followed by 4.5  $\mu$ L DMSO, 300  $\mu$ L CTAB (5 mM in PBS), and 1042.5  $\mu$ L PBS (1X, pH = 7.4). To this solution, 150  $\mu$ L of NaHS (1 mM stock solution in PBS) was mixed and placed in the fluorescence spectrophotometer to monitor the progress of the reaction by exciting the sample at 465 nm. The emission spectra corresponding to the amine were collected every 2-minutes for 60 minutes. At least 3 trials were performed for each experiment. For the reaction that employed 90% v/v DMSO/10% v/v PBS (1X, pH = 7.4) solvent system, the emission spectra were collected every 2-minutes for 30 minutes

**Selectivity study**

To evaluate the reaction specificity, a series of fluorescence time courses were collected using the same methodology as described for the kinetics study. In place of NaHS, three potential sulfide-donors were substituted: L-cysteine, reduced glutathione, and 2-mercaptoethanol. All emission spectra reflect the reaction of 100  $\mu$ M sulfide-donor with 20  $\mu$ M **6g** in 0.5 % v/v DMSO, 99.5 % v/v PBS, and 1 mM CTAB. At least 3 trials were performed for each experiment.

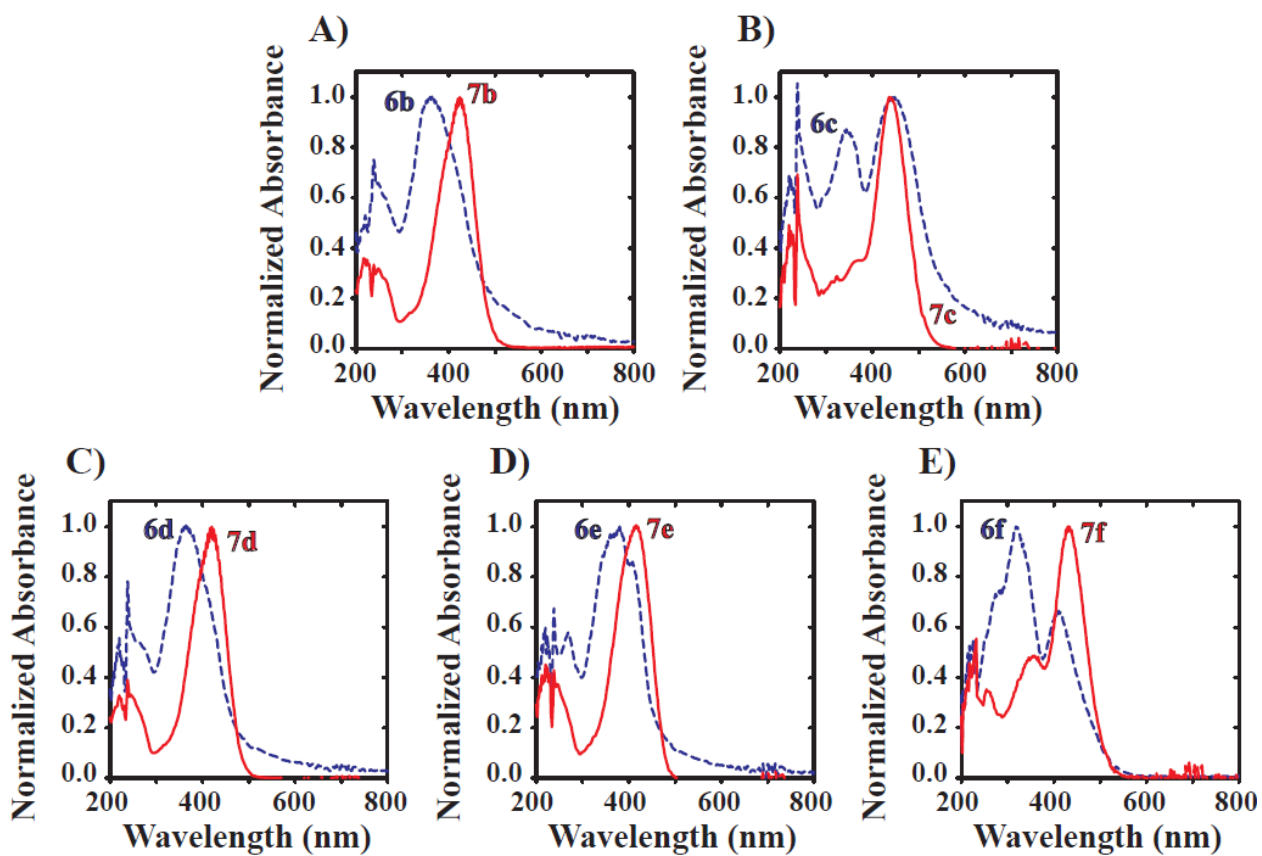

**Figure S1. UV-visible Spectra Illustrating Spectral Overlap.** Samples (50  $\mu\text{M}$ ) were prepared in 5% DMSO in PBS (v/v) for the study.

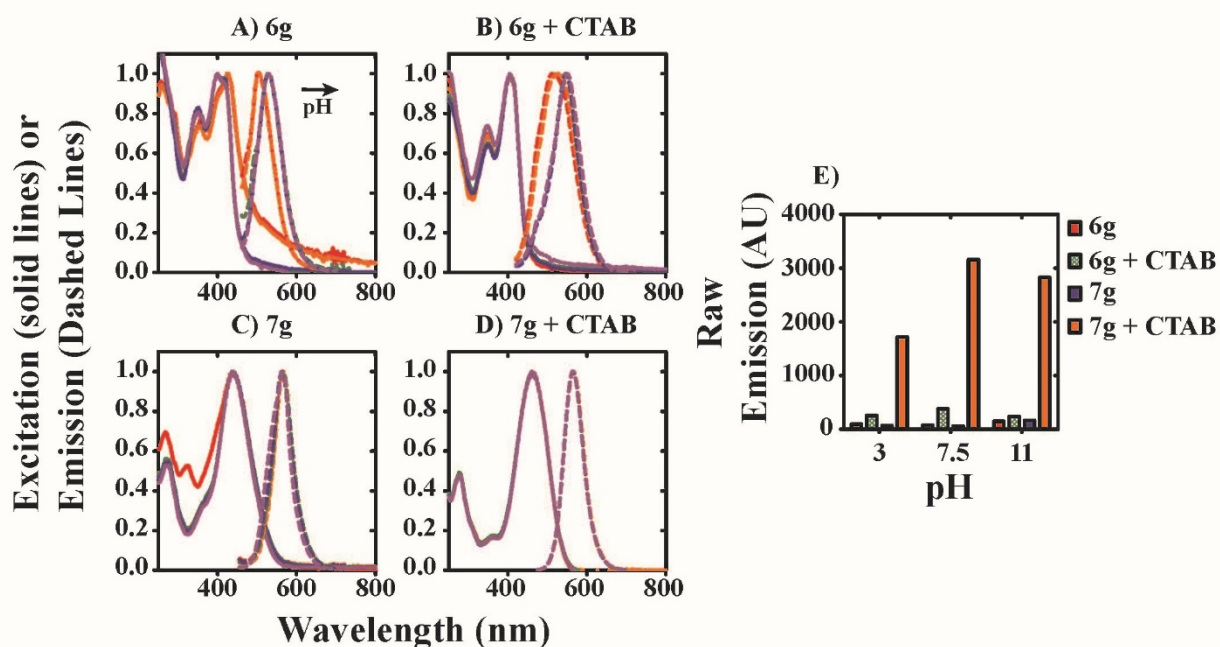

**Figure S2. Effects of pH on 6g/7g Spectral Properties.** Excitation spectra collected in 0.5 % DMSO/PBS buffer with pH adjusted to 3.0, 4.8, 7.5, 9.2, and 11.0 are represented as solid red, orange, green, blue, and purple lines, respectively. Corresponding emission spectra collected at pH = 3.0, 4.8, 7.5, 9.2, and 11.0 are represented as dashed red, orange, green, blue, and purple lines, respectively. Excitation/emission spectra were collected for (A) **6g** in the absence of CTAB, (B) **6g** in the presence of 1 mM CTAB, (C) **7g** in the absence of CTAB, and (D) **7g** in the presence of 1 mM CTAB. **6g** emission spectra were collected using excitation wavelengths of 425, 425, 405, 405, and 405 nm for conditions with pH = 3.0, 4.8, 7.5, 9.2, and 11.0, respectively, in the absence of CTAB. In the presence of CTAB, **6g** emission spectra were collected using an excitation wavelength equal to 405 nm at all pH values. **7g** emission spectra were generated using excitation wavelengths equal to 440 or 460 nm depending on whether 1 mM CTAB was absent or present, respectively. (E) Raw emission intensities plotted for **6g** without CTAB (red bars), **6g** with 1 mM CTAB (green bars), **7g** without CTAB (purple bars), and **7g** with 1 mM CTAB (orange bars) as a function of pH.

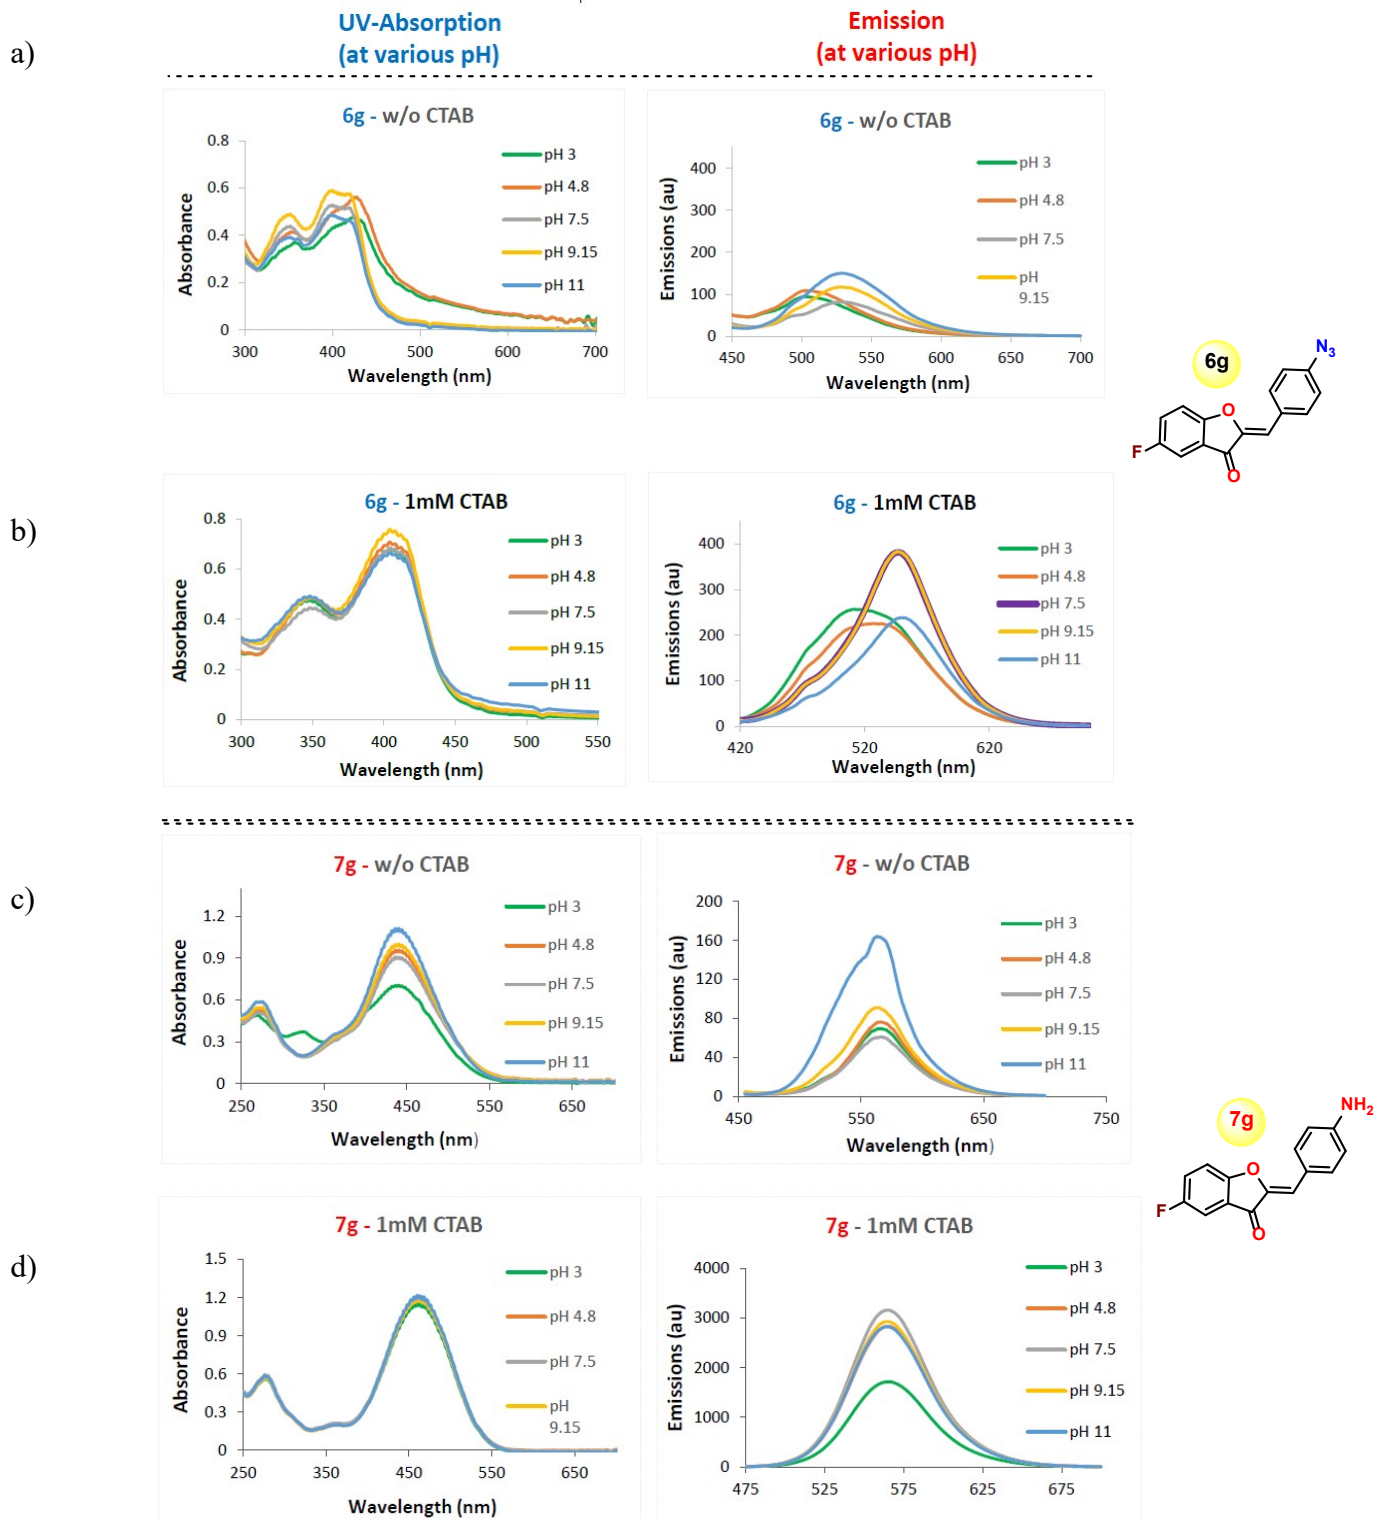

**Figure S3. Effects of CTAB on Fluorescence Intensity of 6g/7g at various pH. Solvent system; 0.5%v/v DMSO in PBS.**

AK\_3\_82\_2\_1H

7.926  
7.909  
7.815  
7.801  
7.677  
7.660  
7.646  
7.335  
7.319  
7.244  
7.229  
7.214  
7.109  
7.092  
6.851

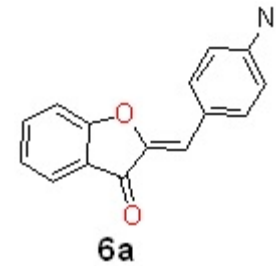

2.15  
1.03  
1.11  
1.06  
1.09  
2.06  
1.00

12 11 10 9 8 7 6 5 4 3 2 1 0 -1 -2

f1 (ppm)

AK\_3\_82\_2\_13C

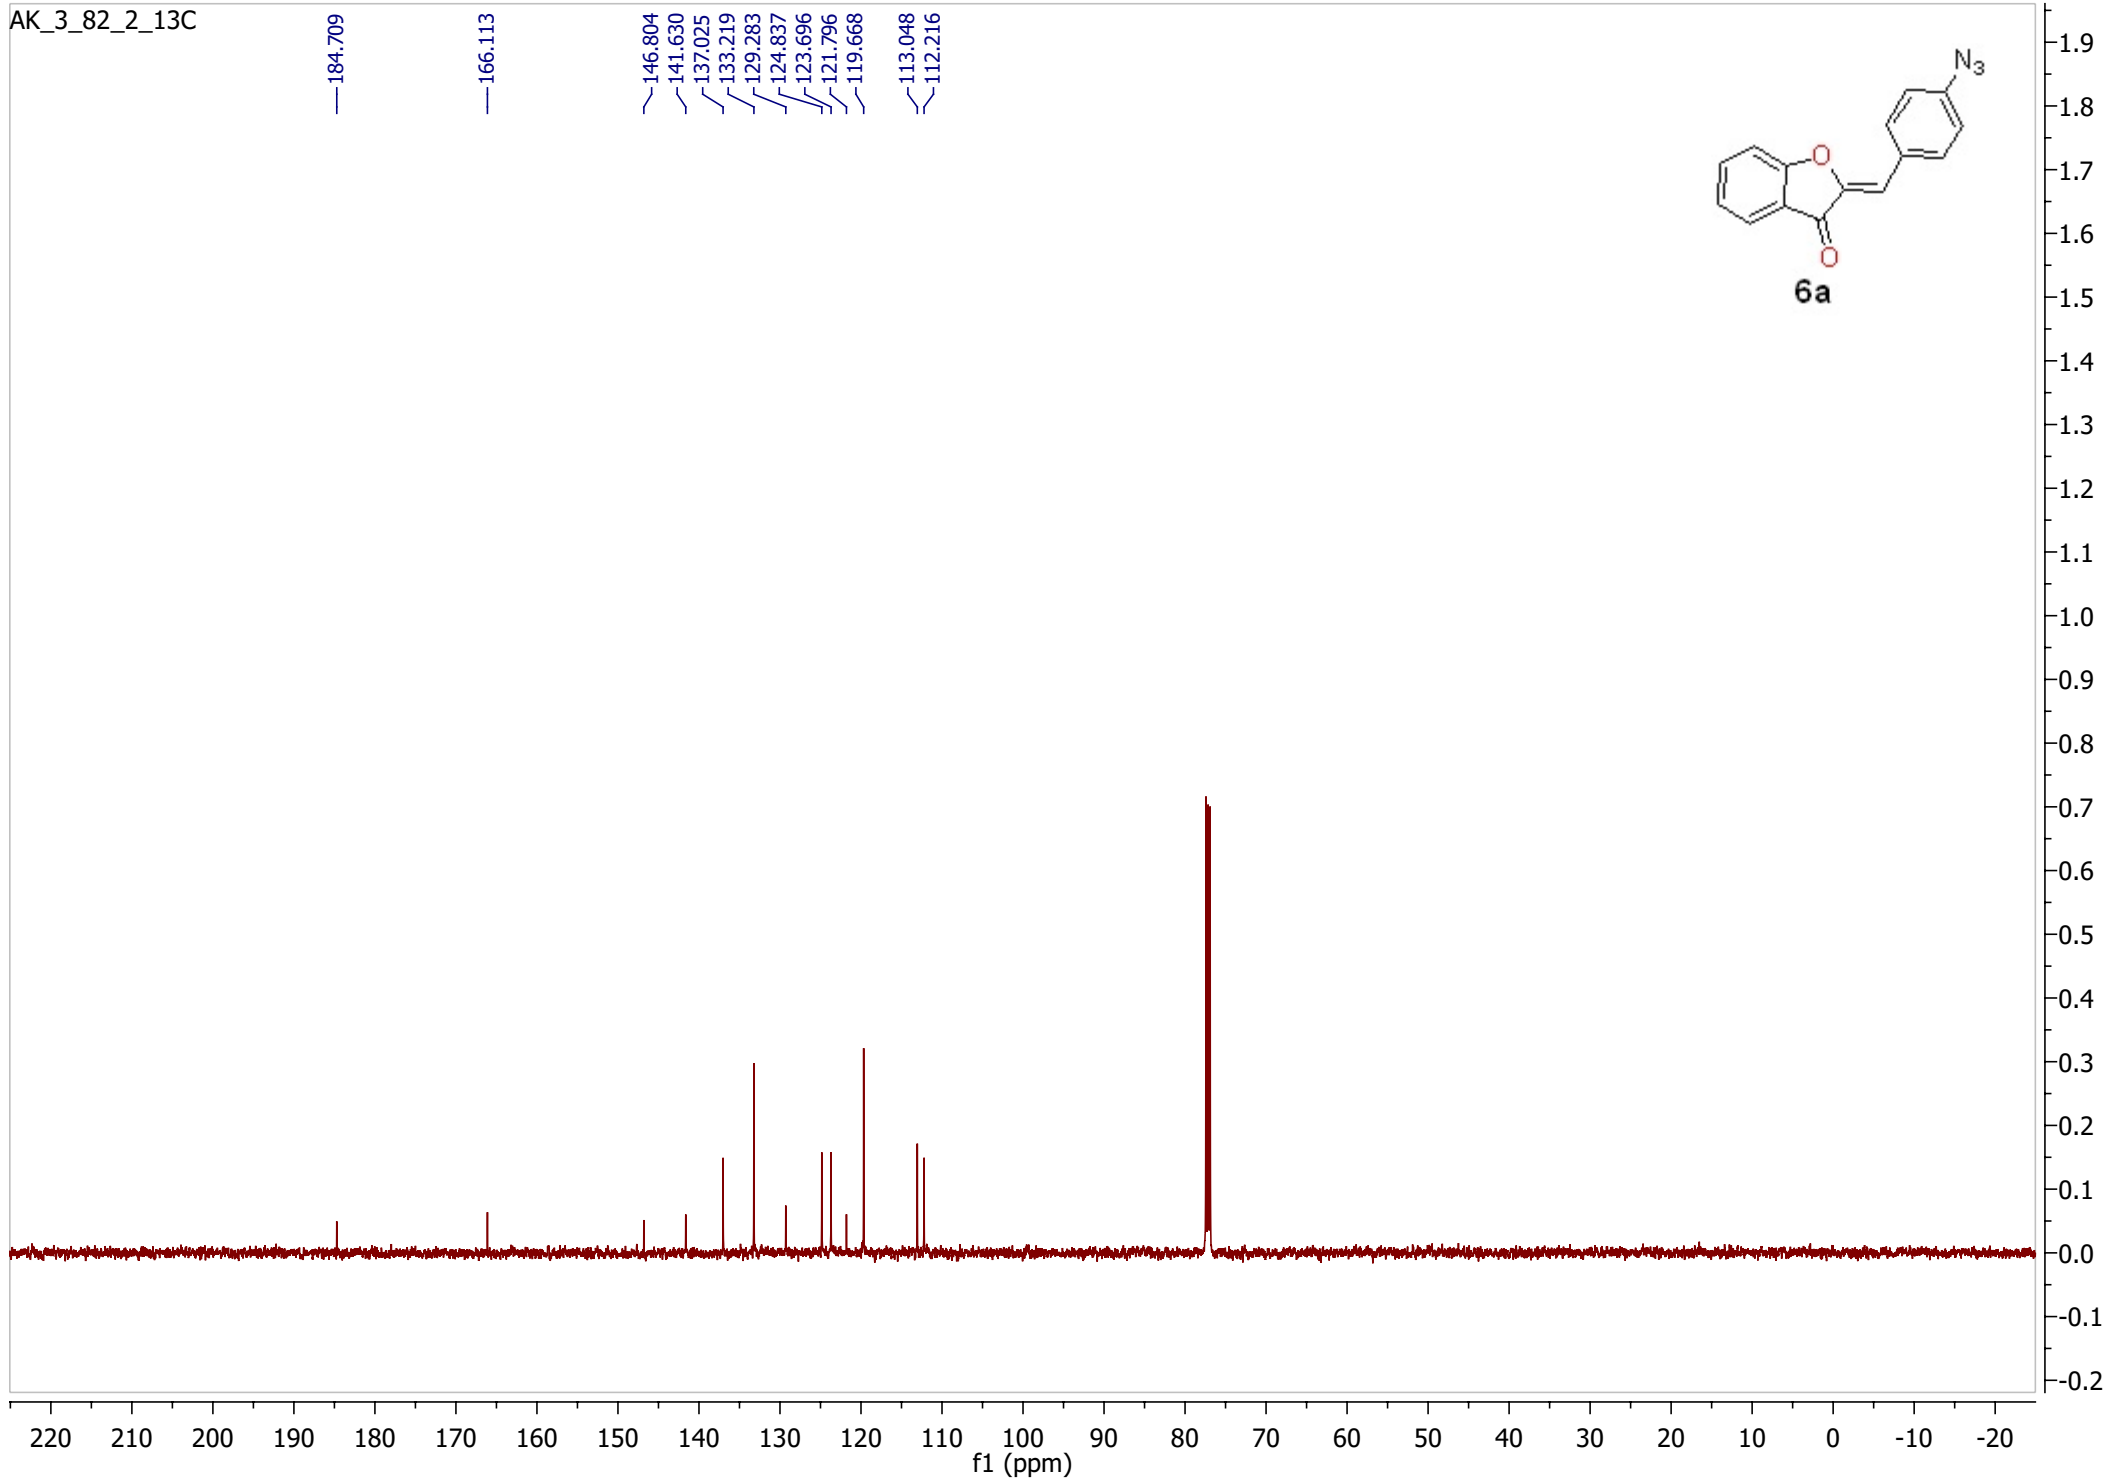



AK\_3\_109\_2\_1H

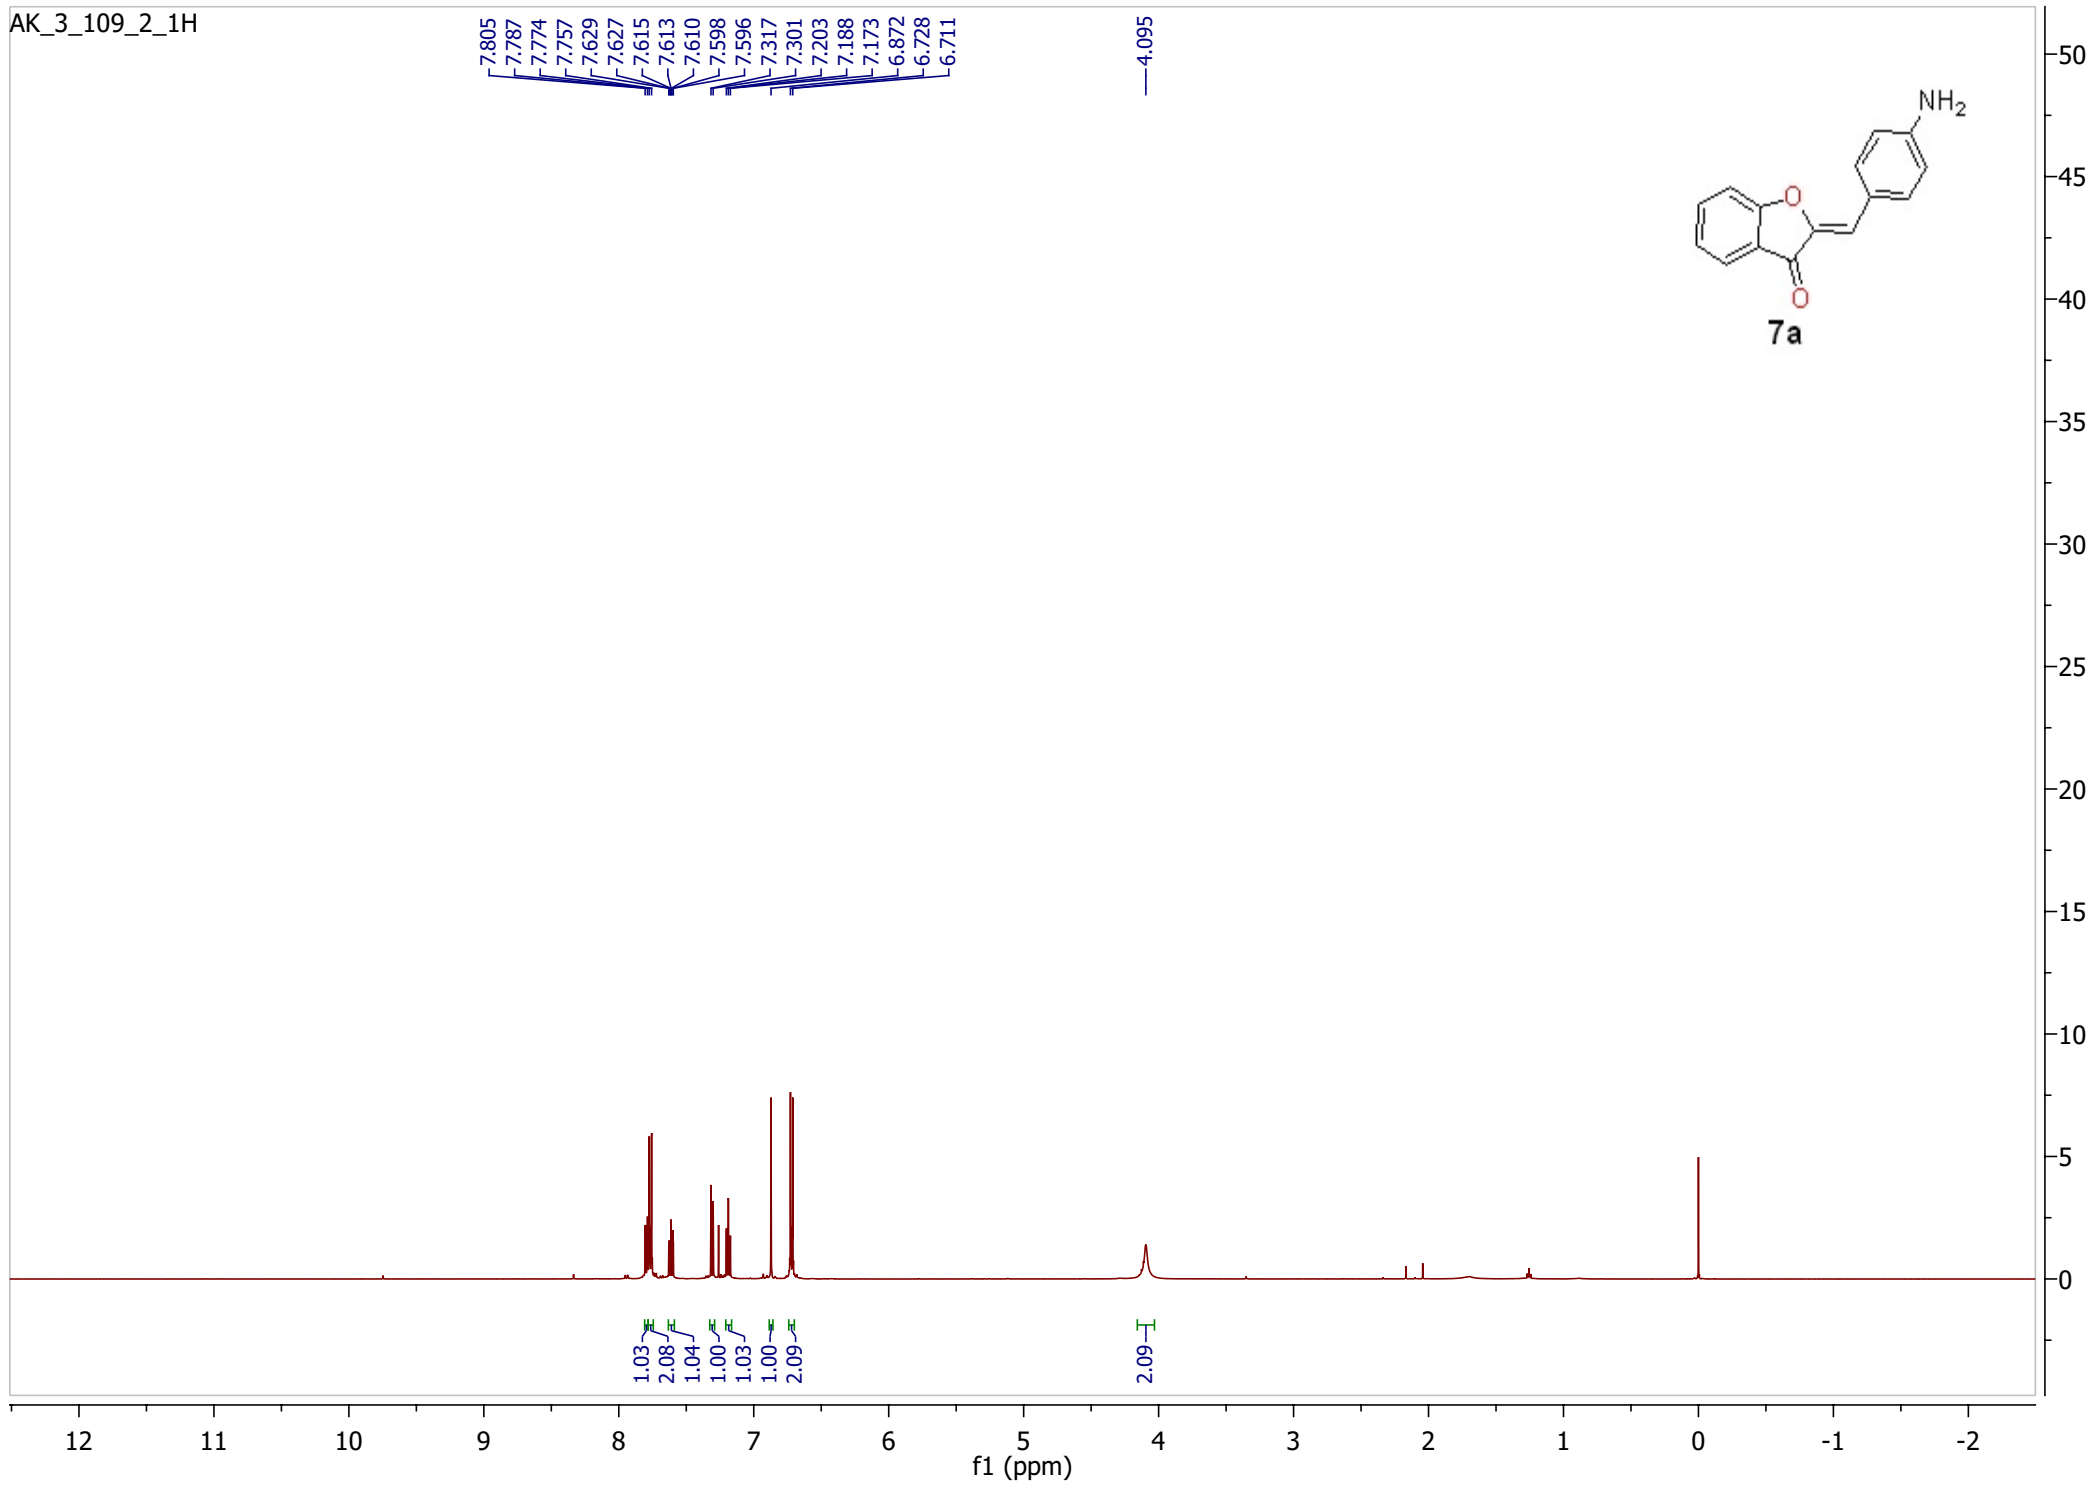

AK\_3\_109\_2\_13C

—184.449  
—165.649  
—148.743  
—145.373  
—136.276  
—133.877  
—124.527  
—123.168  
—122.532  
—122.336  
—115.057  
—114.789  
—112.941

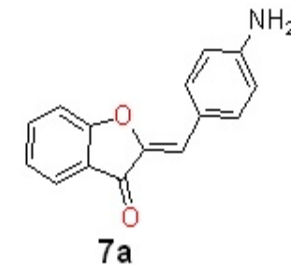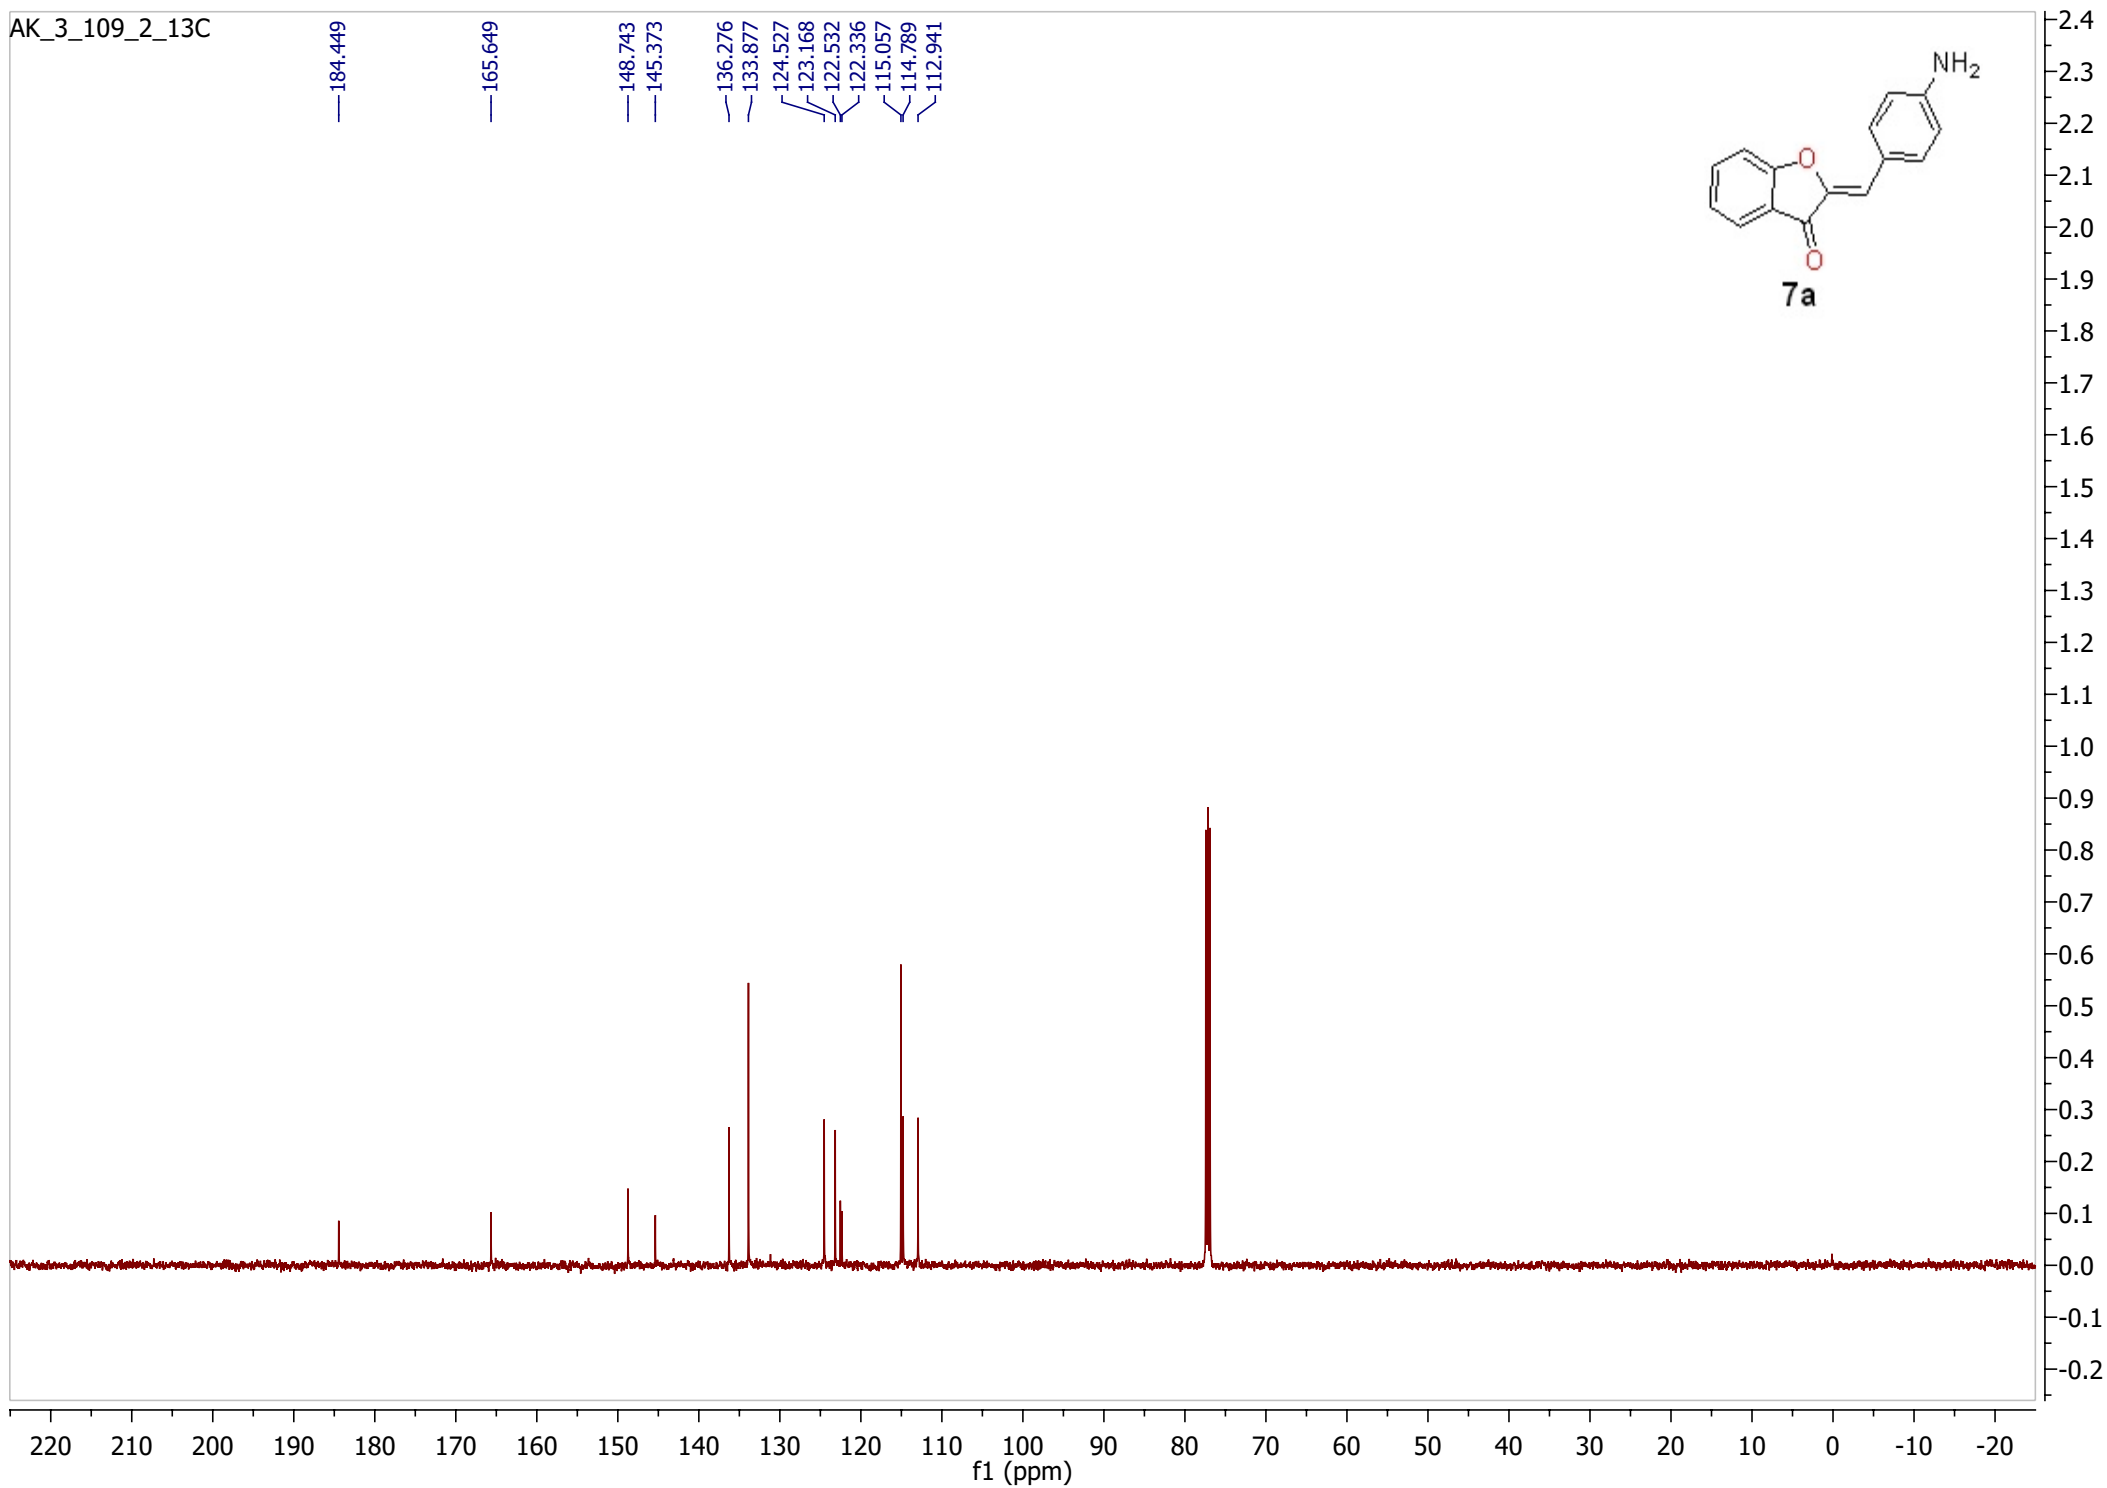

AK\_5\_33\_1H

11.229

8.000  
7.983  
7.636  
7.619  
7.246  
7.229  
6.807  
6.794  
6.790  
6.733  
6.730  
6.717  
6.713

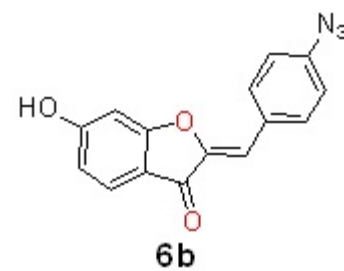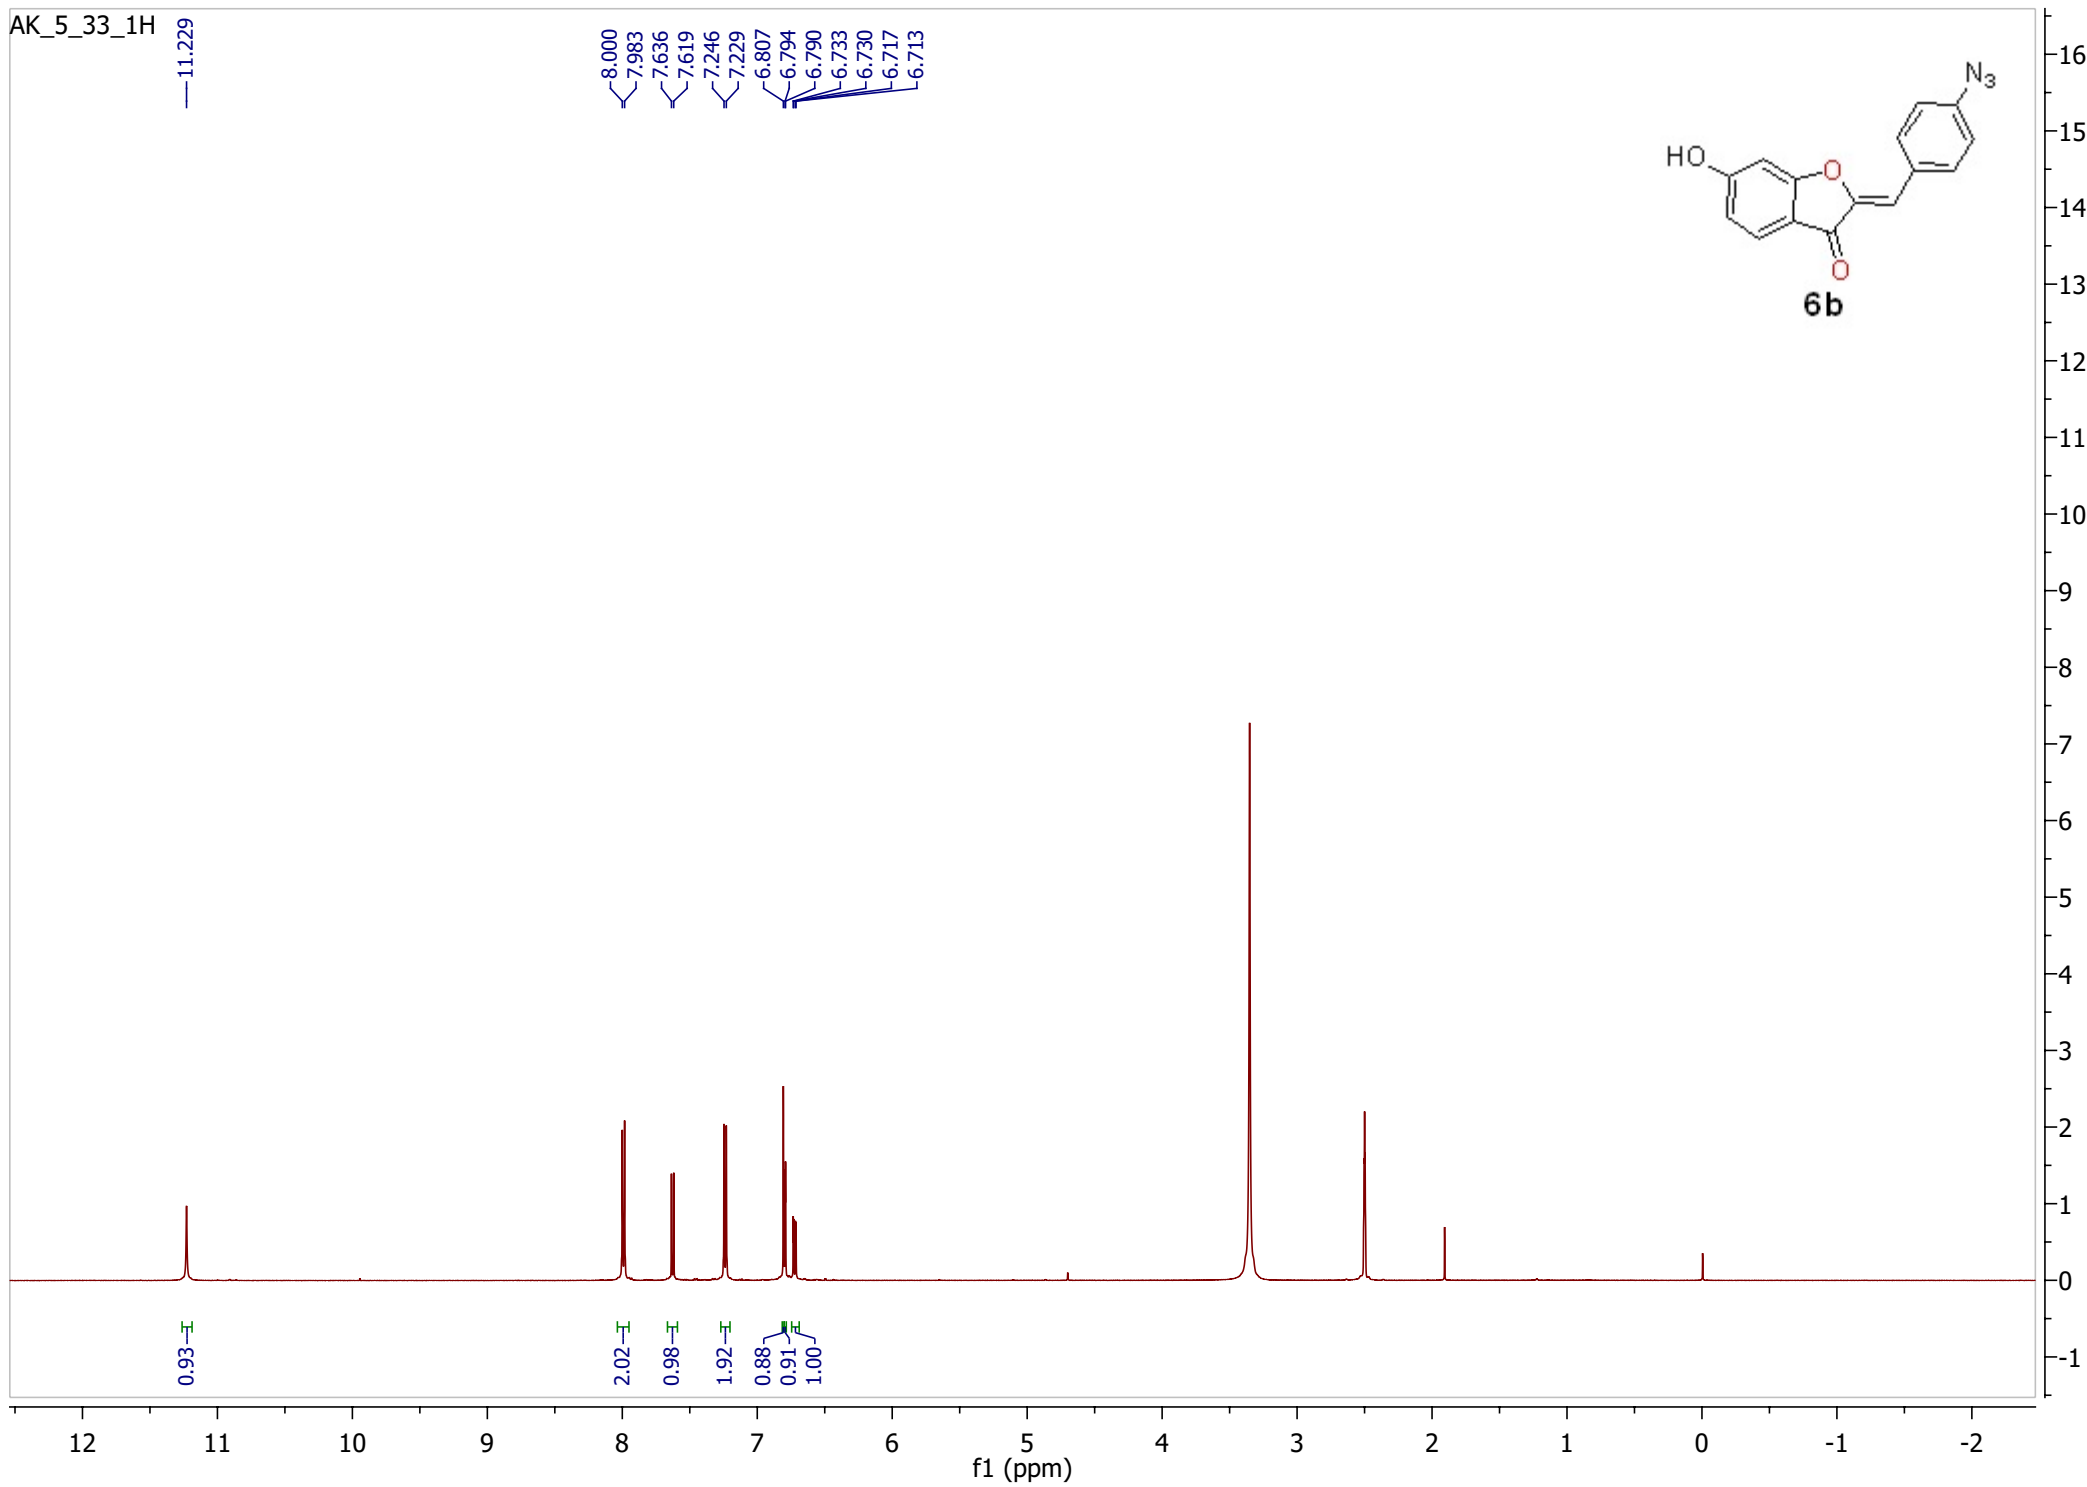

AK\_5\_33\_13C

181.255  
167.773  
166.513  
147.097  
140.481  
132.688  
128.971  
125.902  
119.654  
113.053  
112.781  
109.555  
98.580

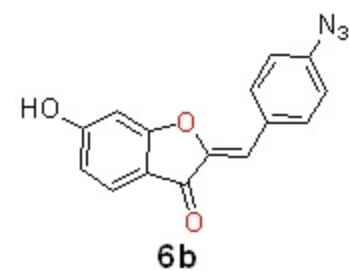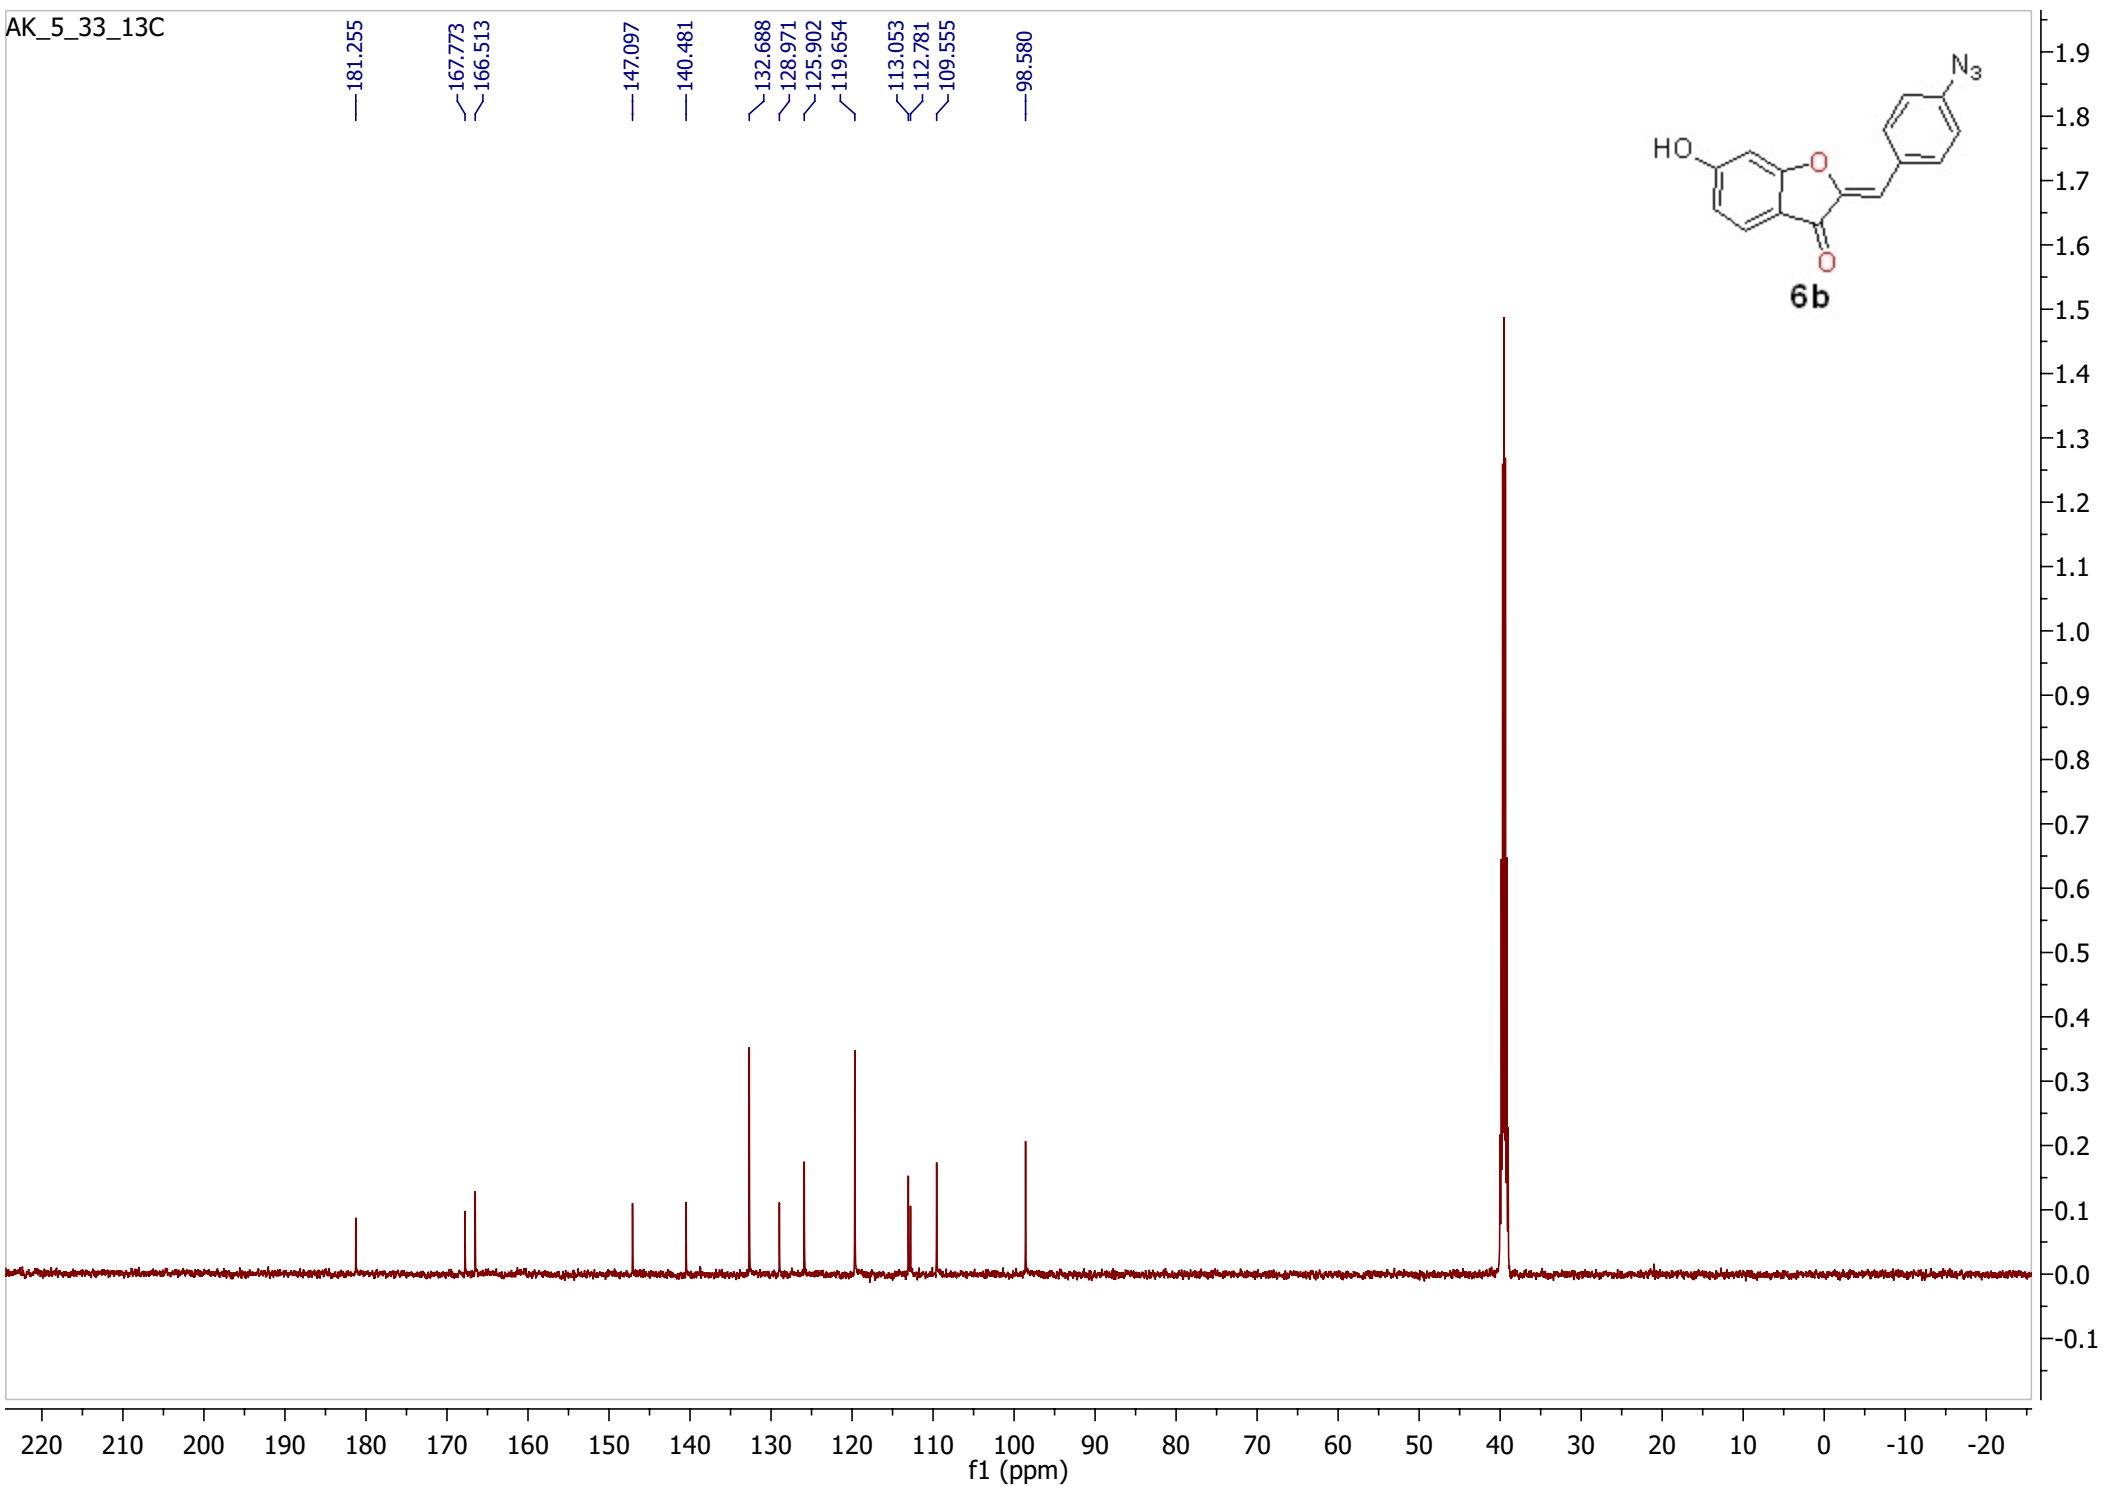

AK\_4\_46\_1H\_DMSO

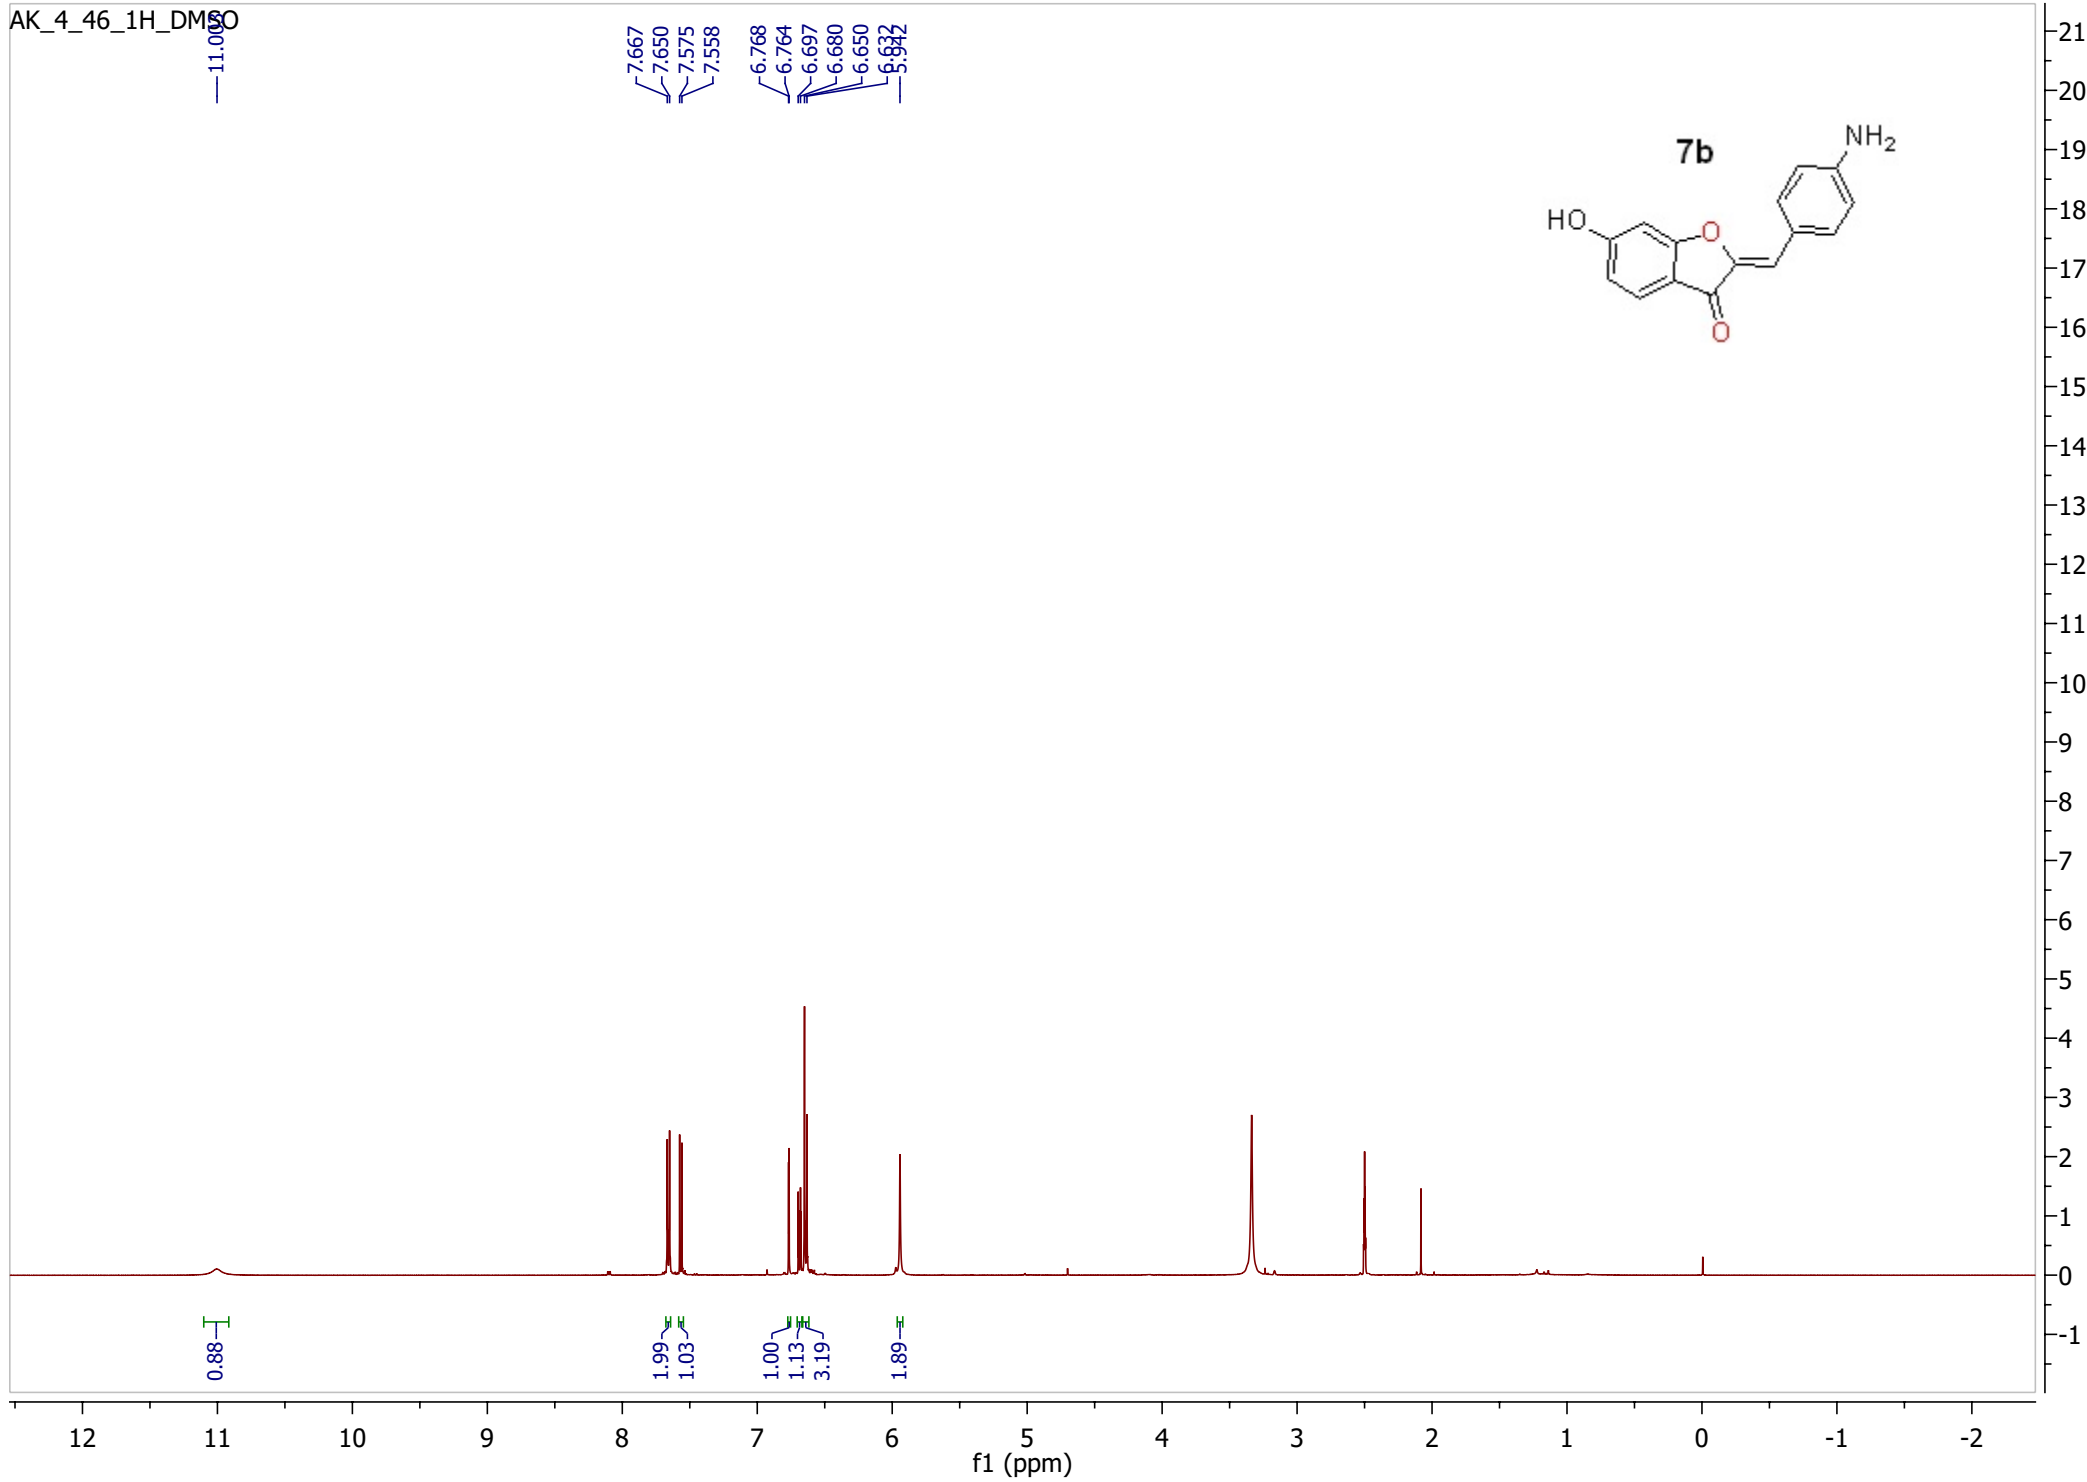

AK\_4\_46\_13C\_DMSO

180.727  
166.889  
165.570  
151.092  
144.541  
133.287  
125.323  
118.991  
113.809  
113.598  
112.929  
112.547  
98.378

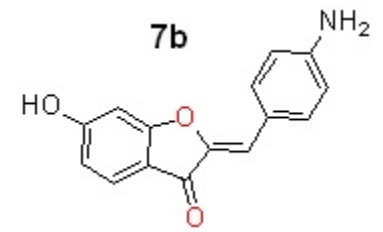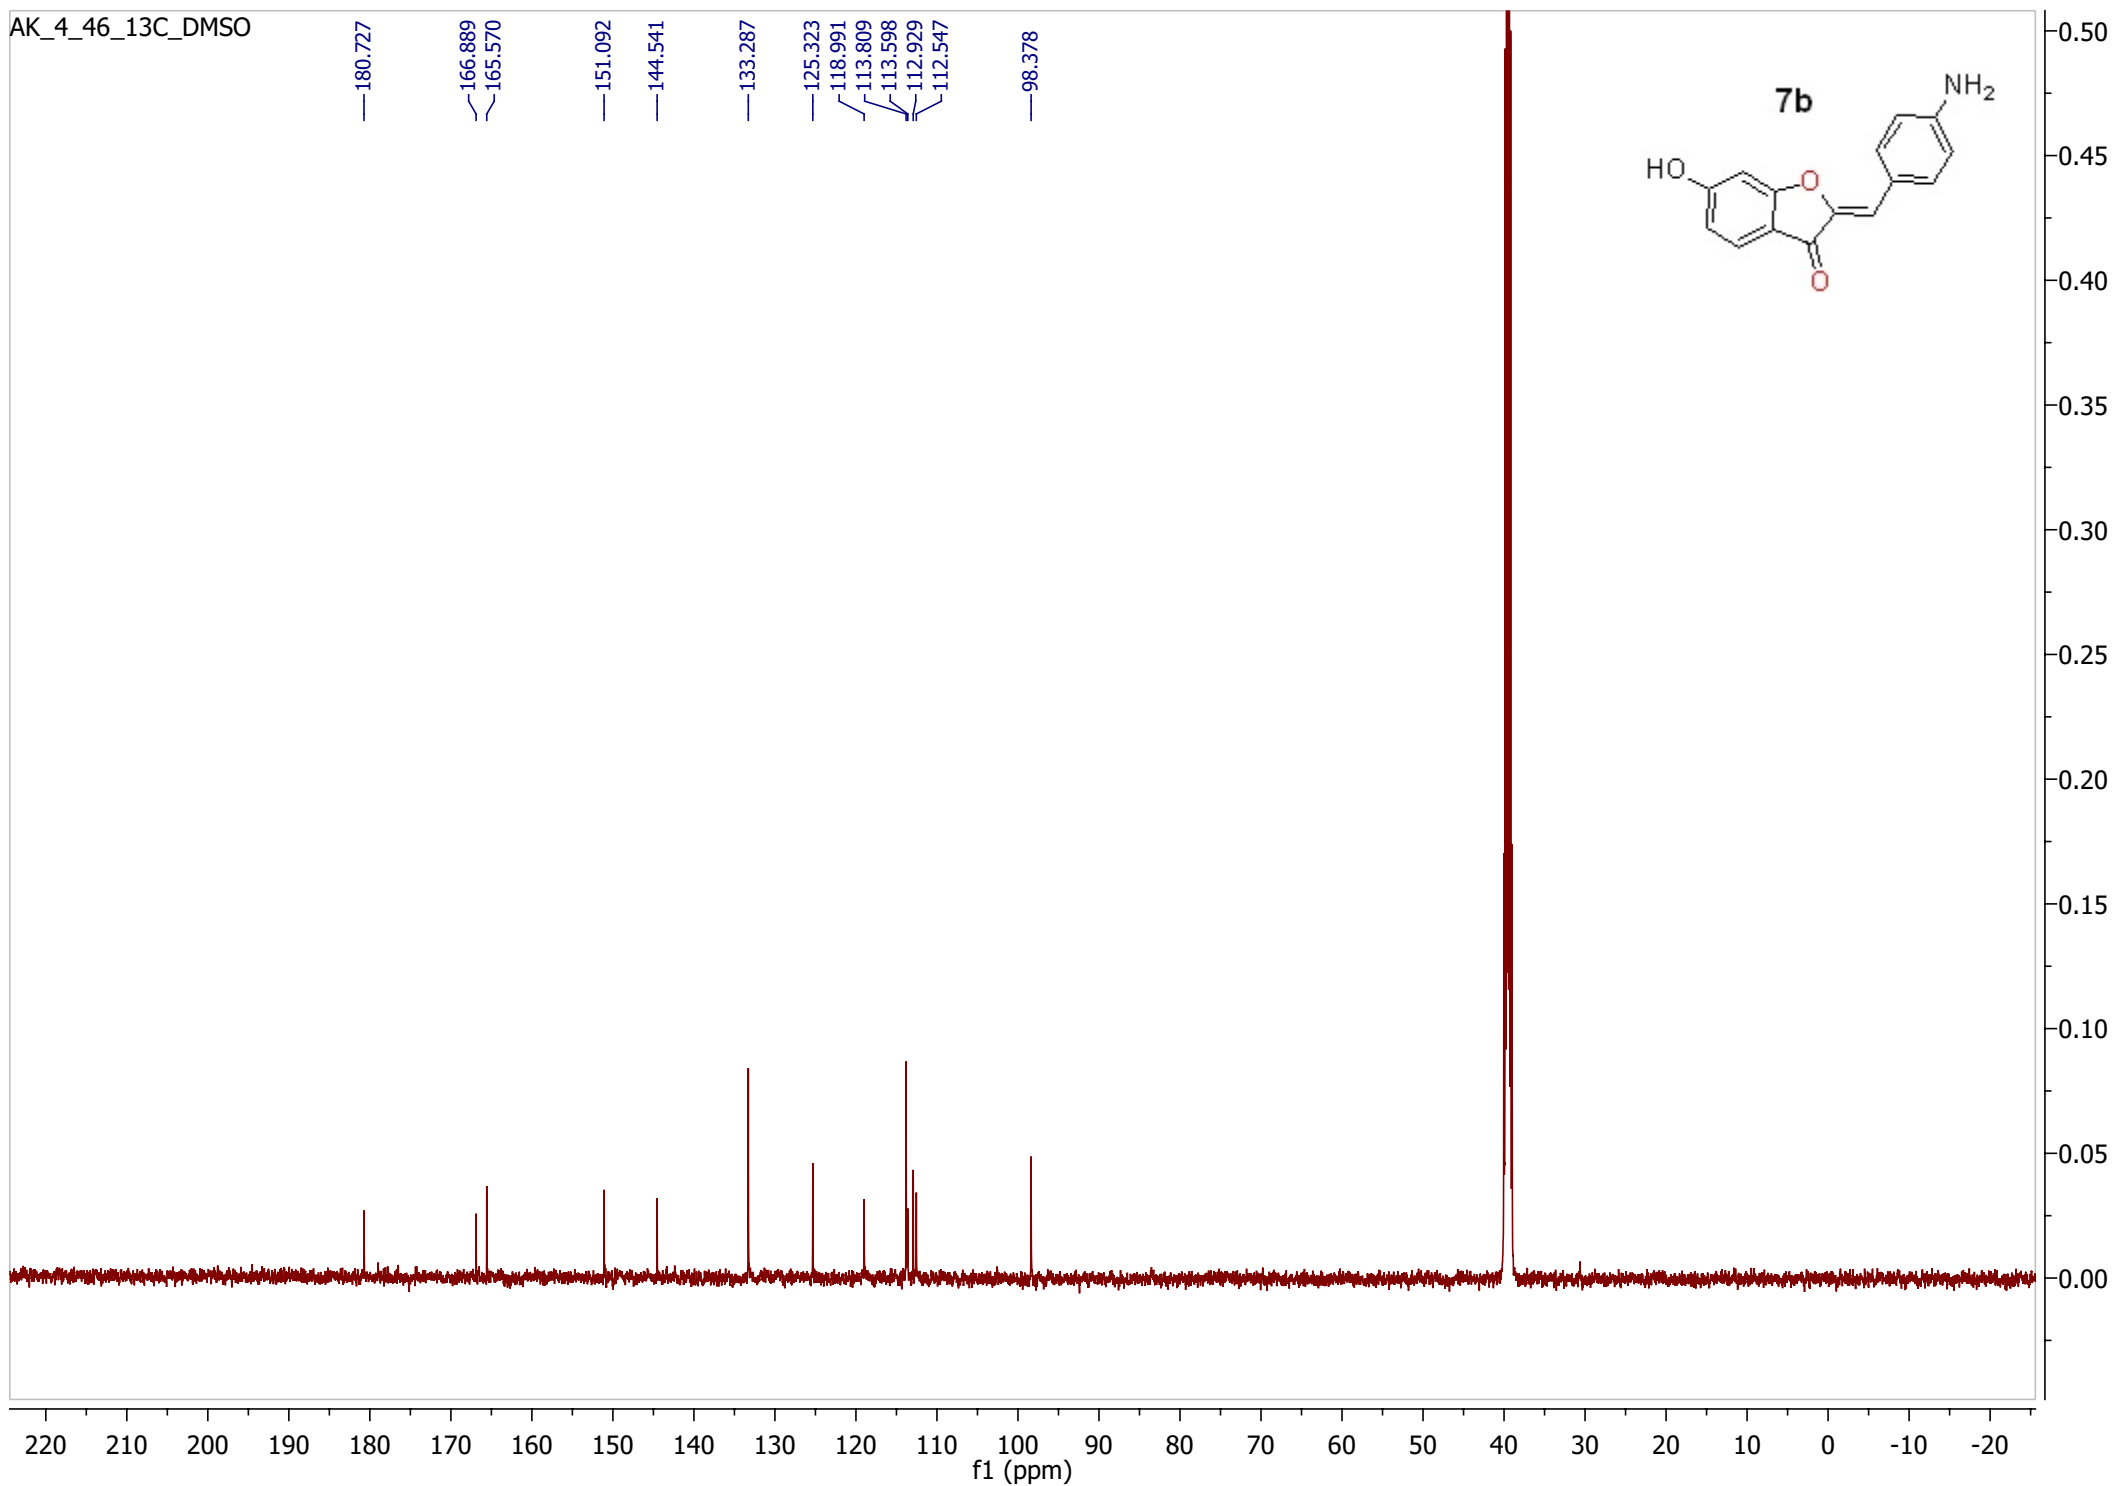

AK\_5\_35

11.159  
0.81

7.989  
7.972  
7.552  
7.536  
7.519  
7.238  
7.220  
6.859  
6.843  
6.772  
6.648  
6.632  
2.02  
1.04  
1.99  
1.00  
1.00  
1.03

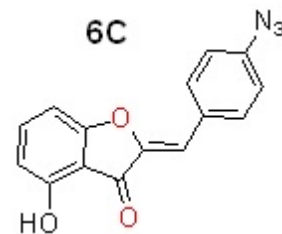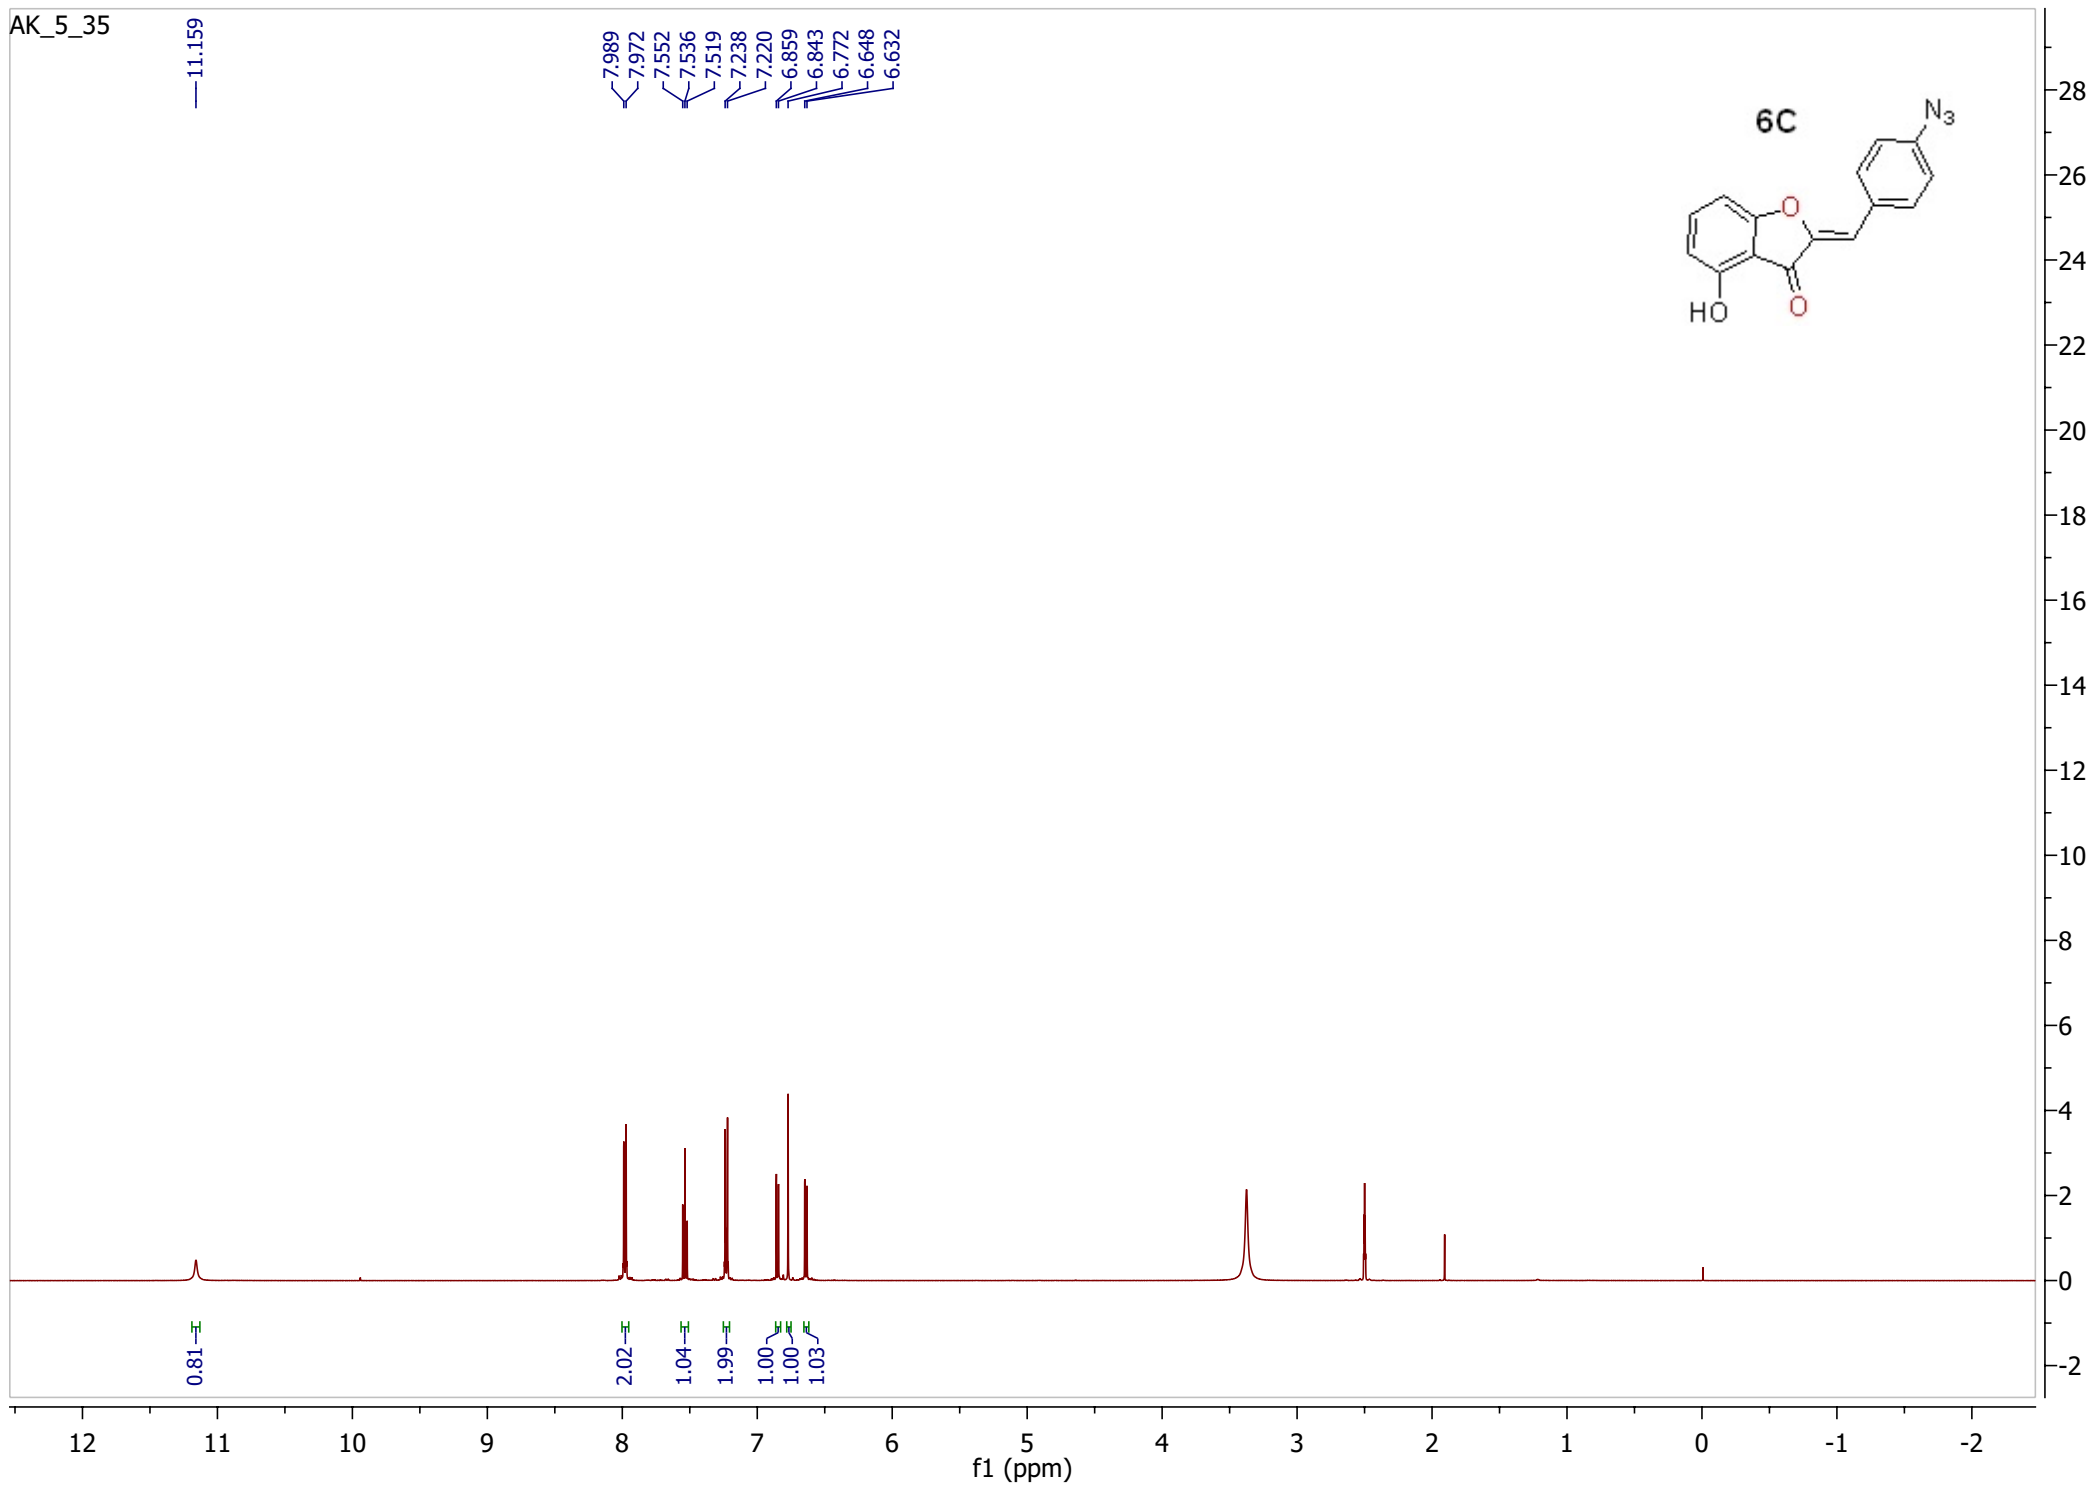

AK\_5\_35\_13C

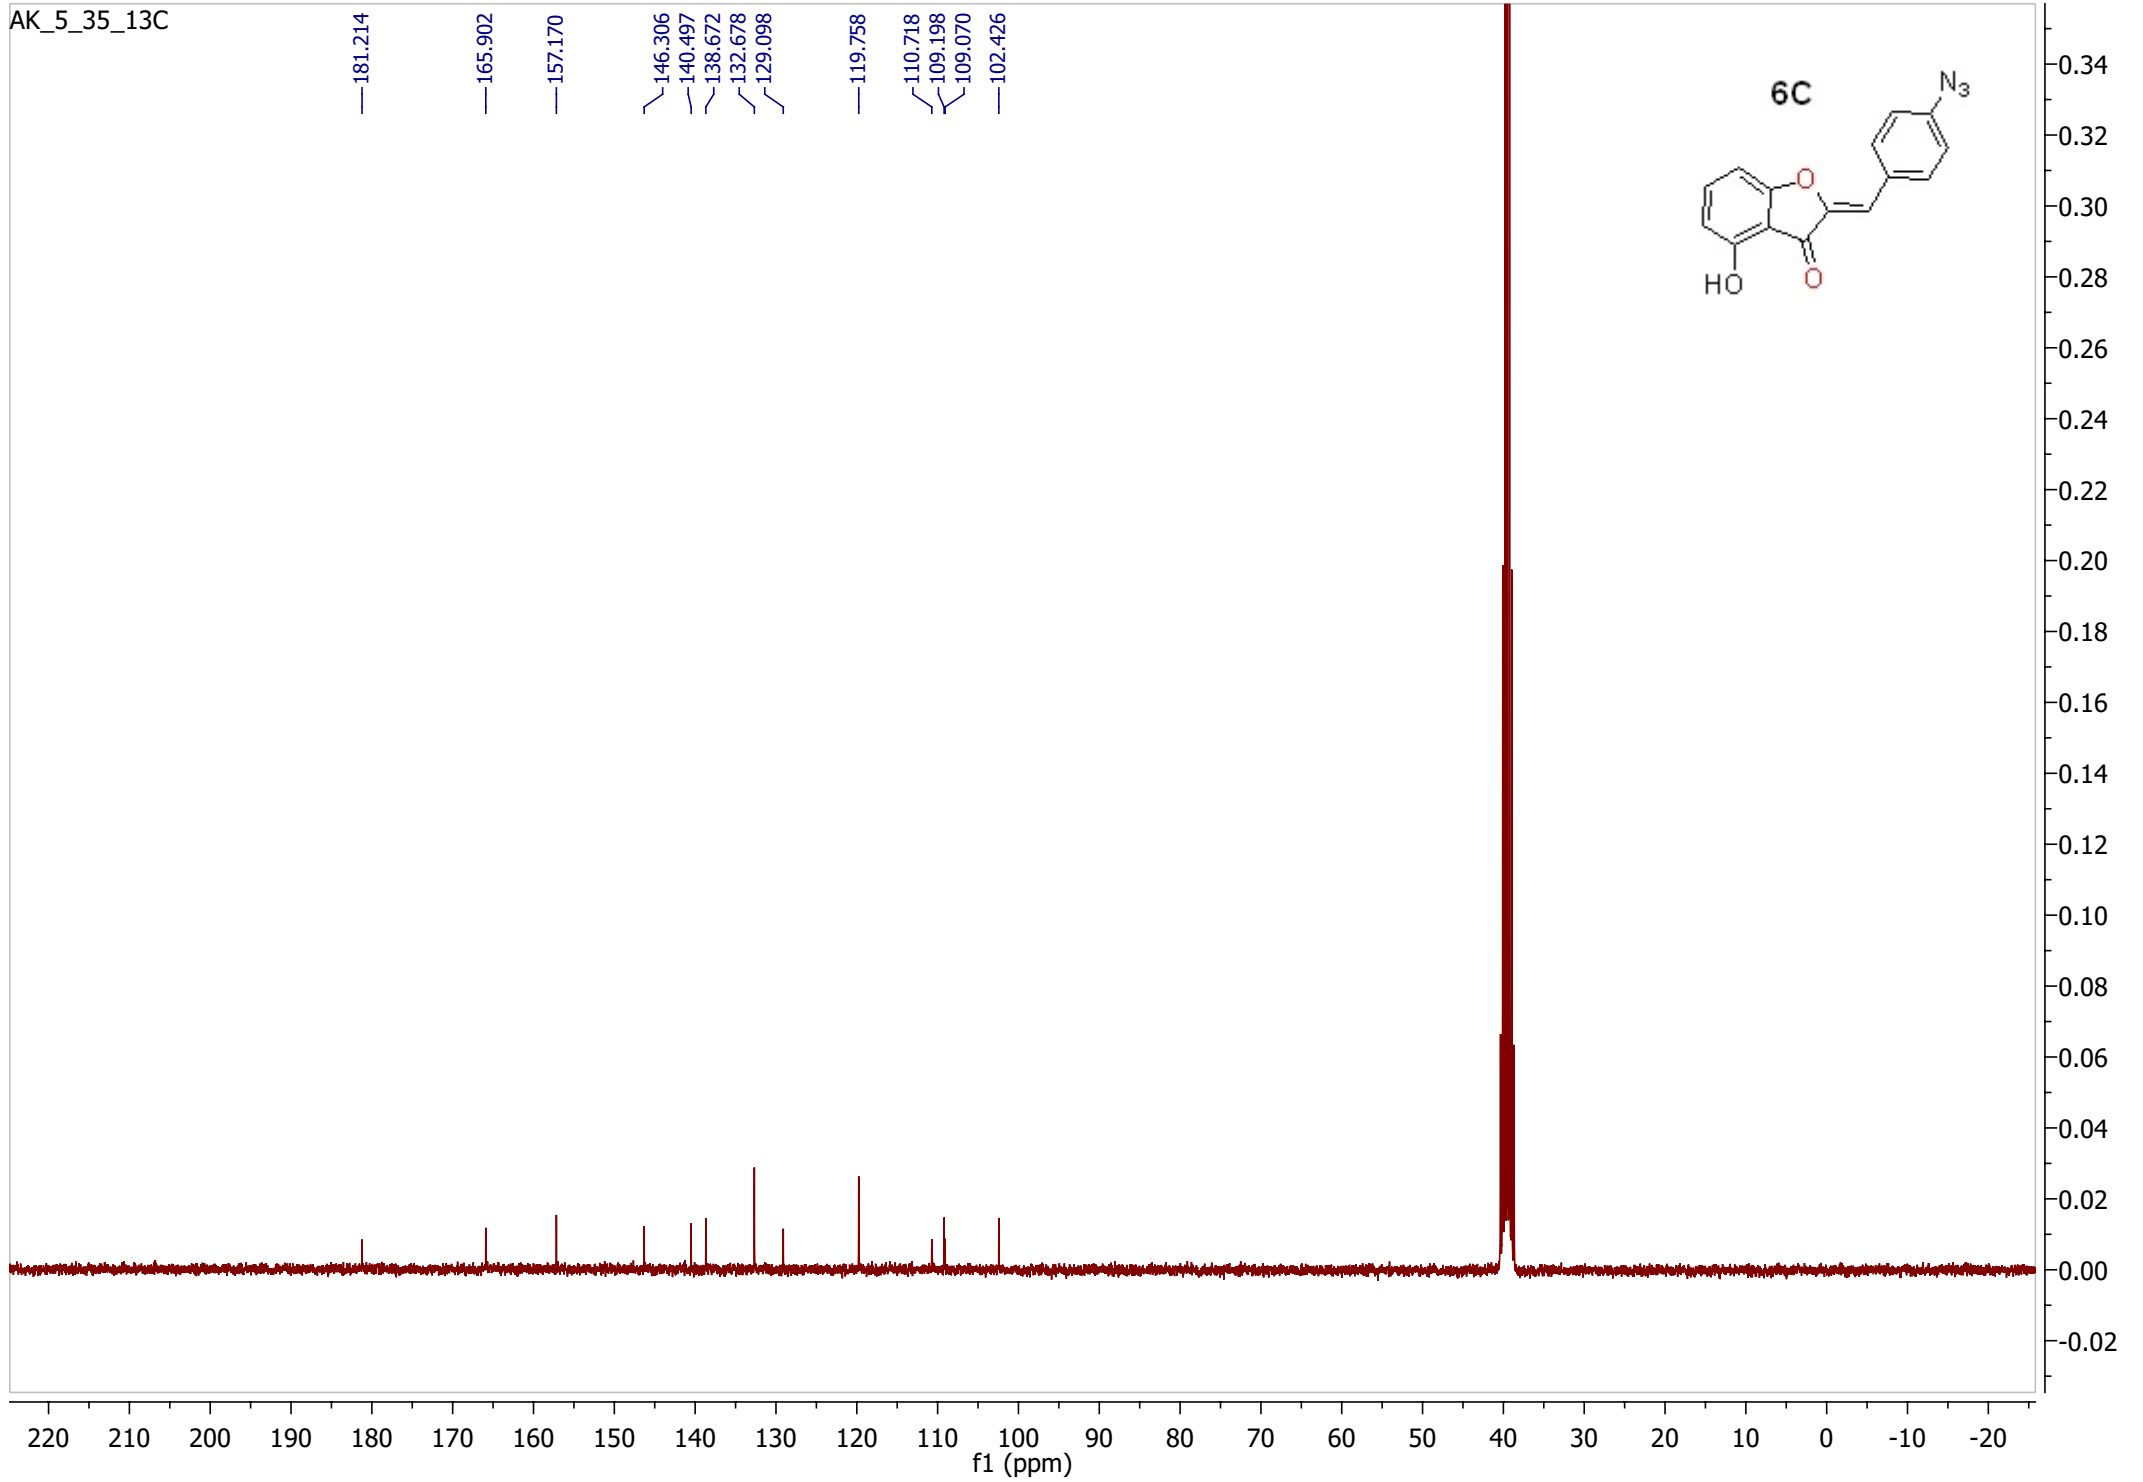



AK\_5\_47\_1H

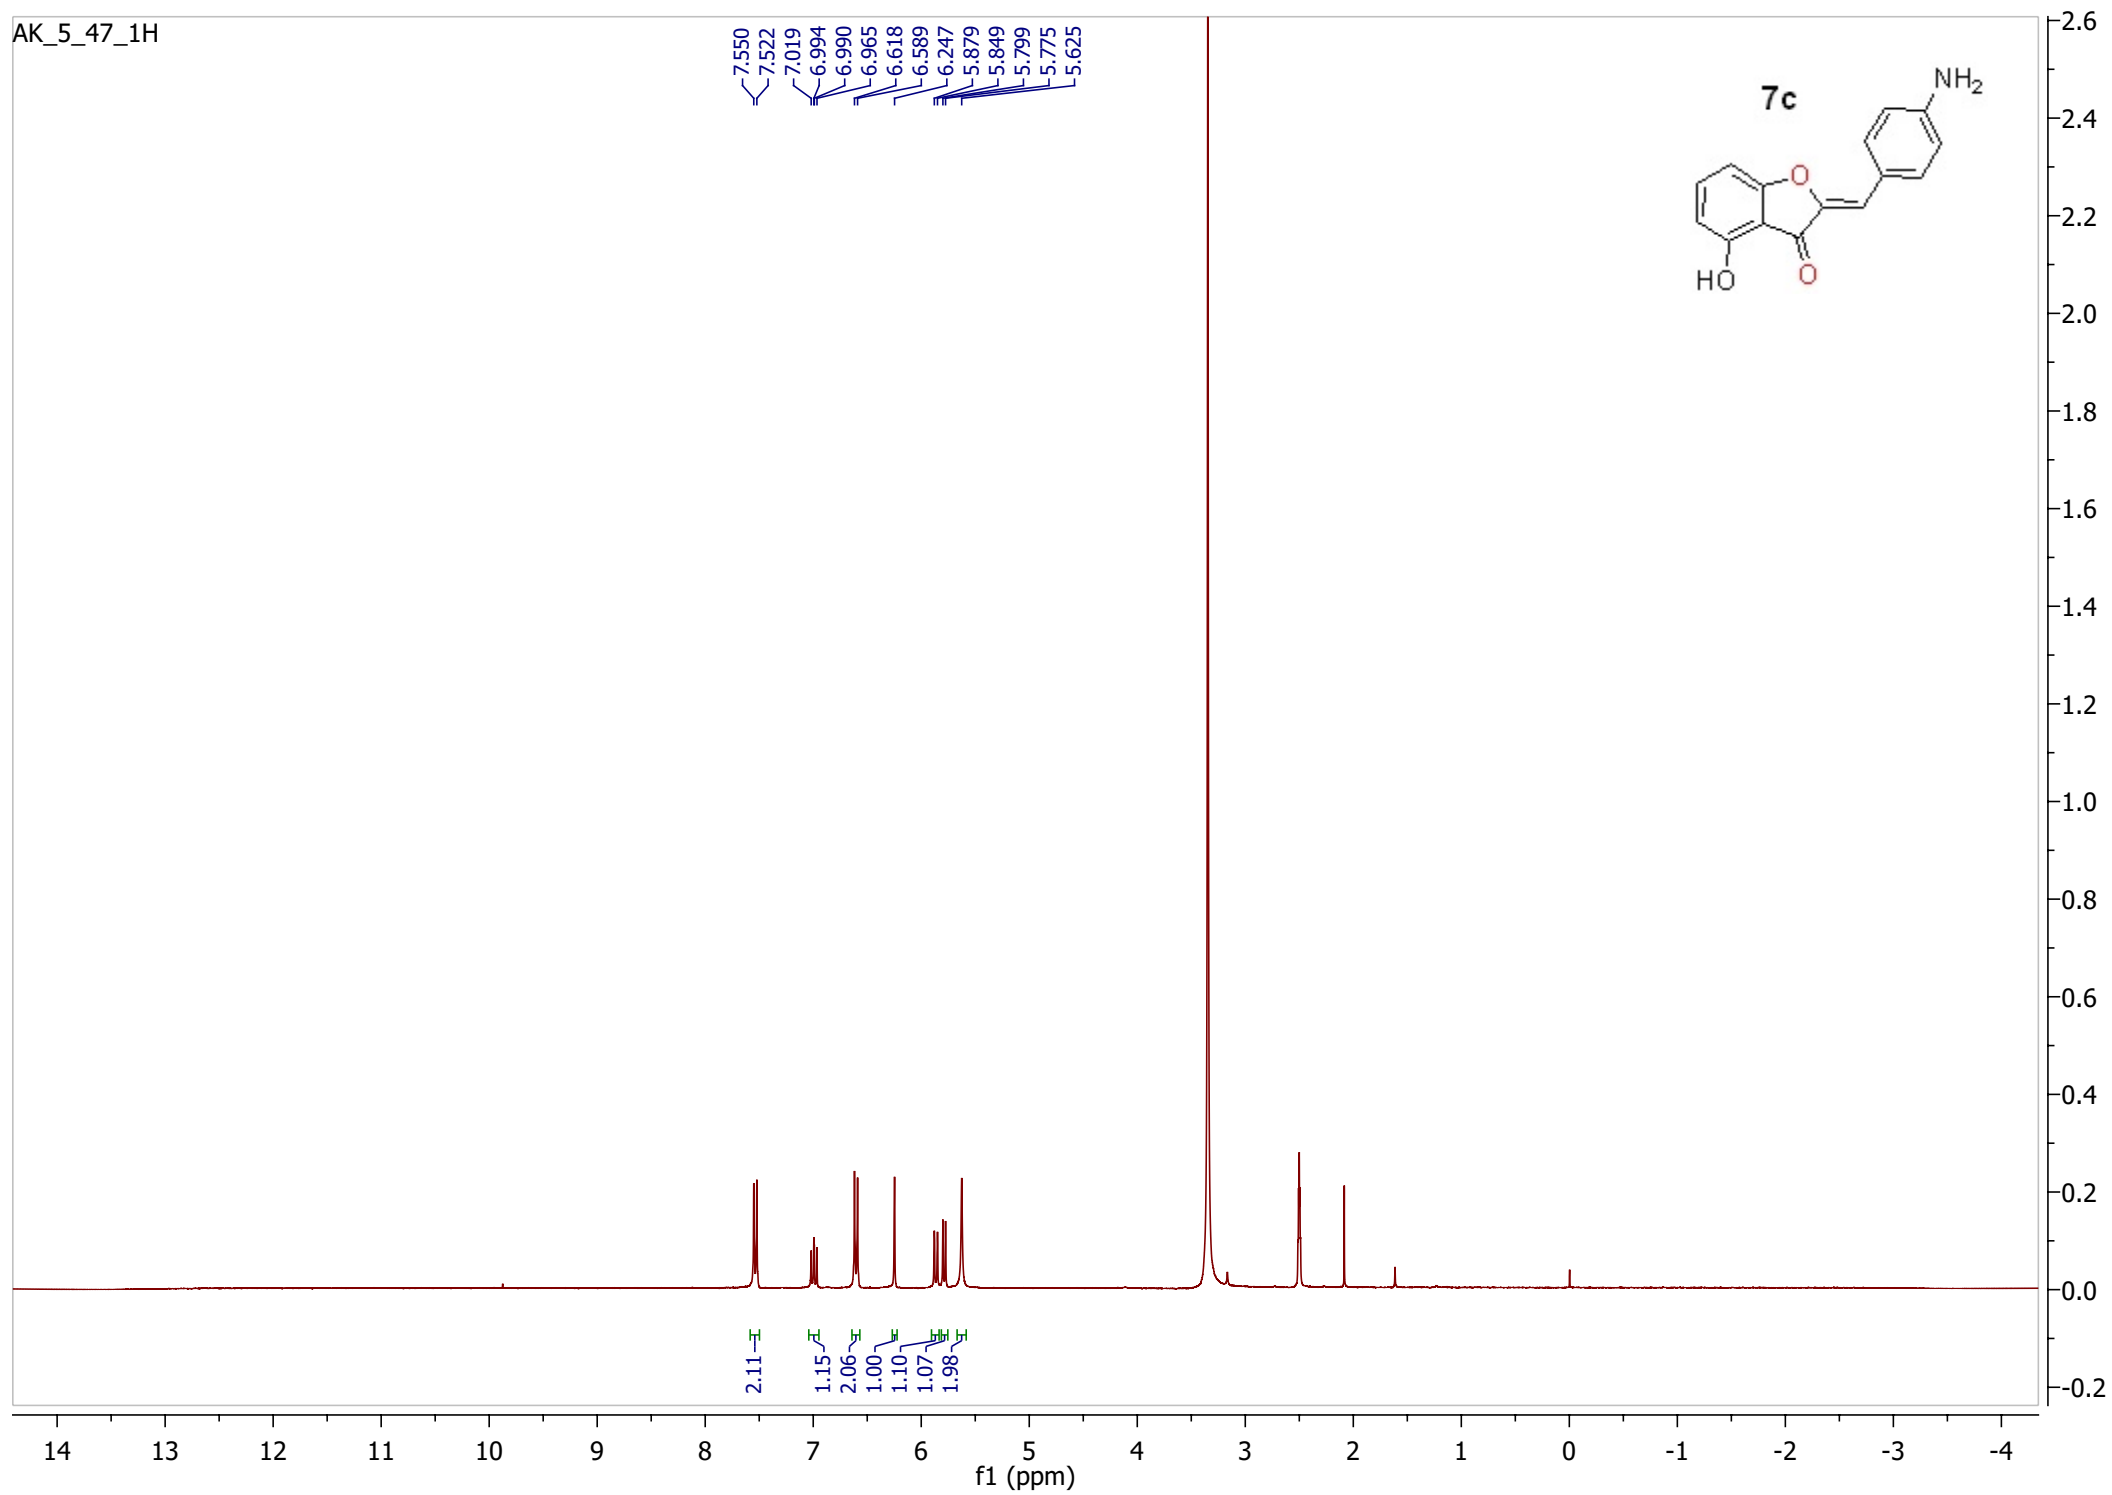

AK\_5\_47\_13C

—182.115  
—173.907  
—165.885  
  
—149.678  
—145.870  
  
—136.455  
—131.934  
  
—120.454  
—117.709  
—113.838  
—110.699  
—107.510  
  
—89.348

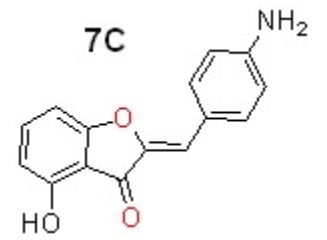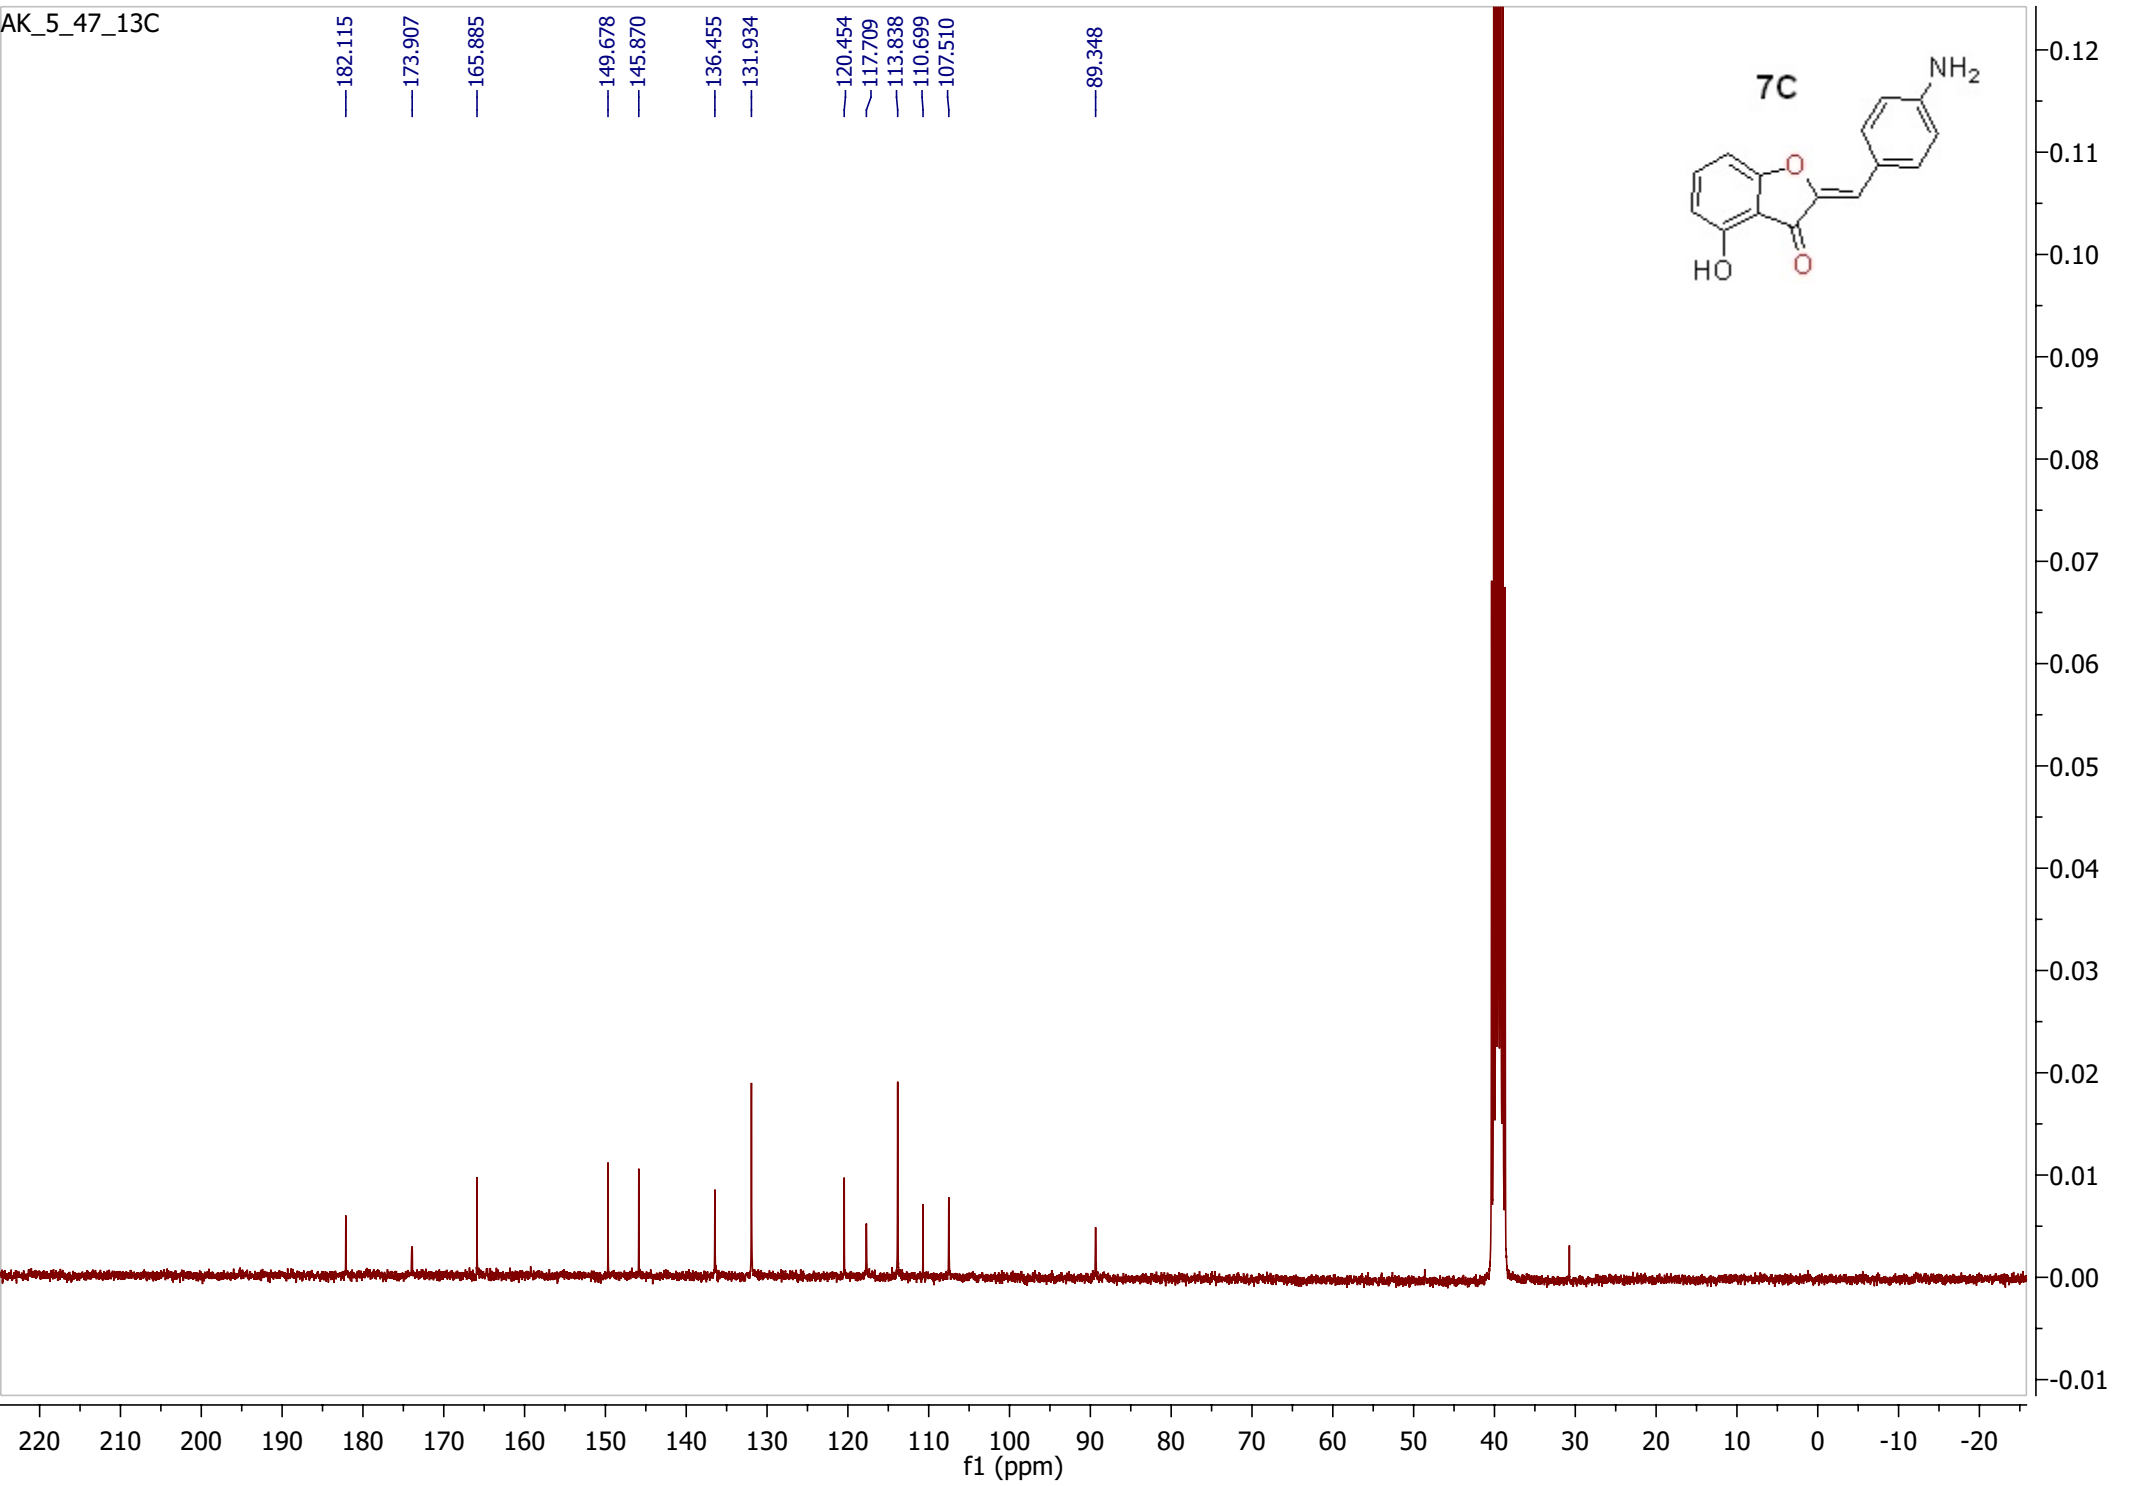

AK\_4\_40A

11.239

7.814  
7.789  
7.755  
7.737  
7.600  
7.584  
7.354  
7.337  
7.320  
6.778  
6.774  
6.733  
6.715  
6.712  
6.699  
6.695

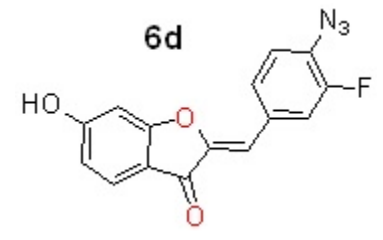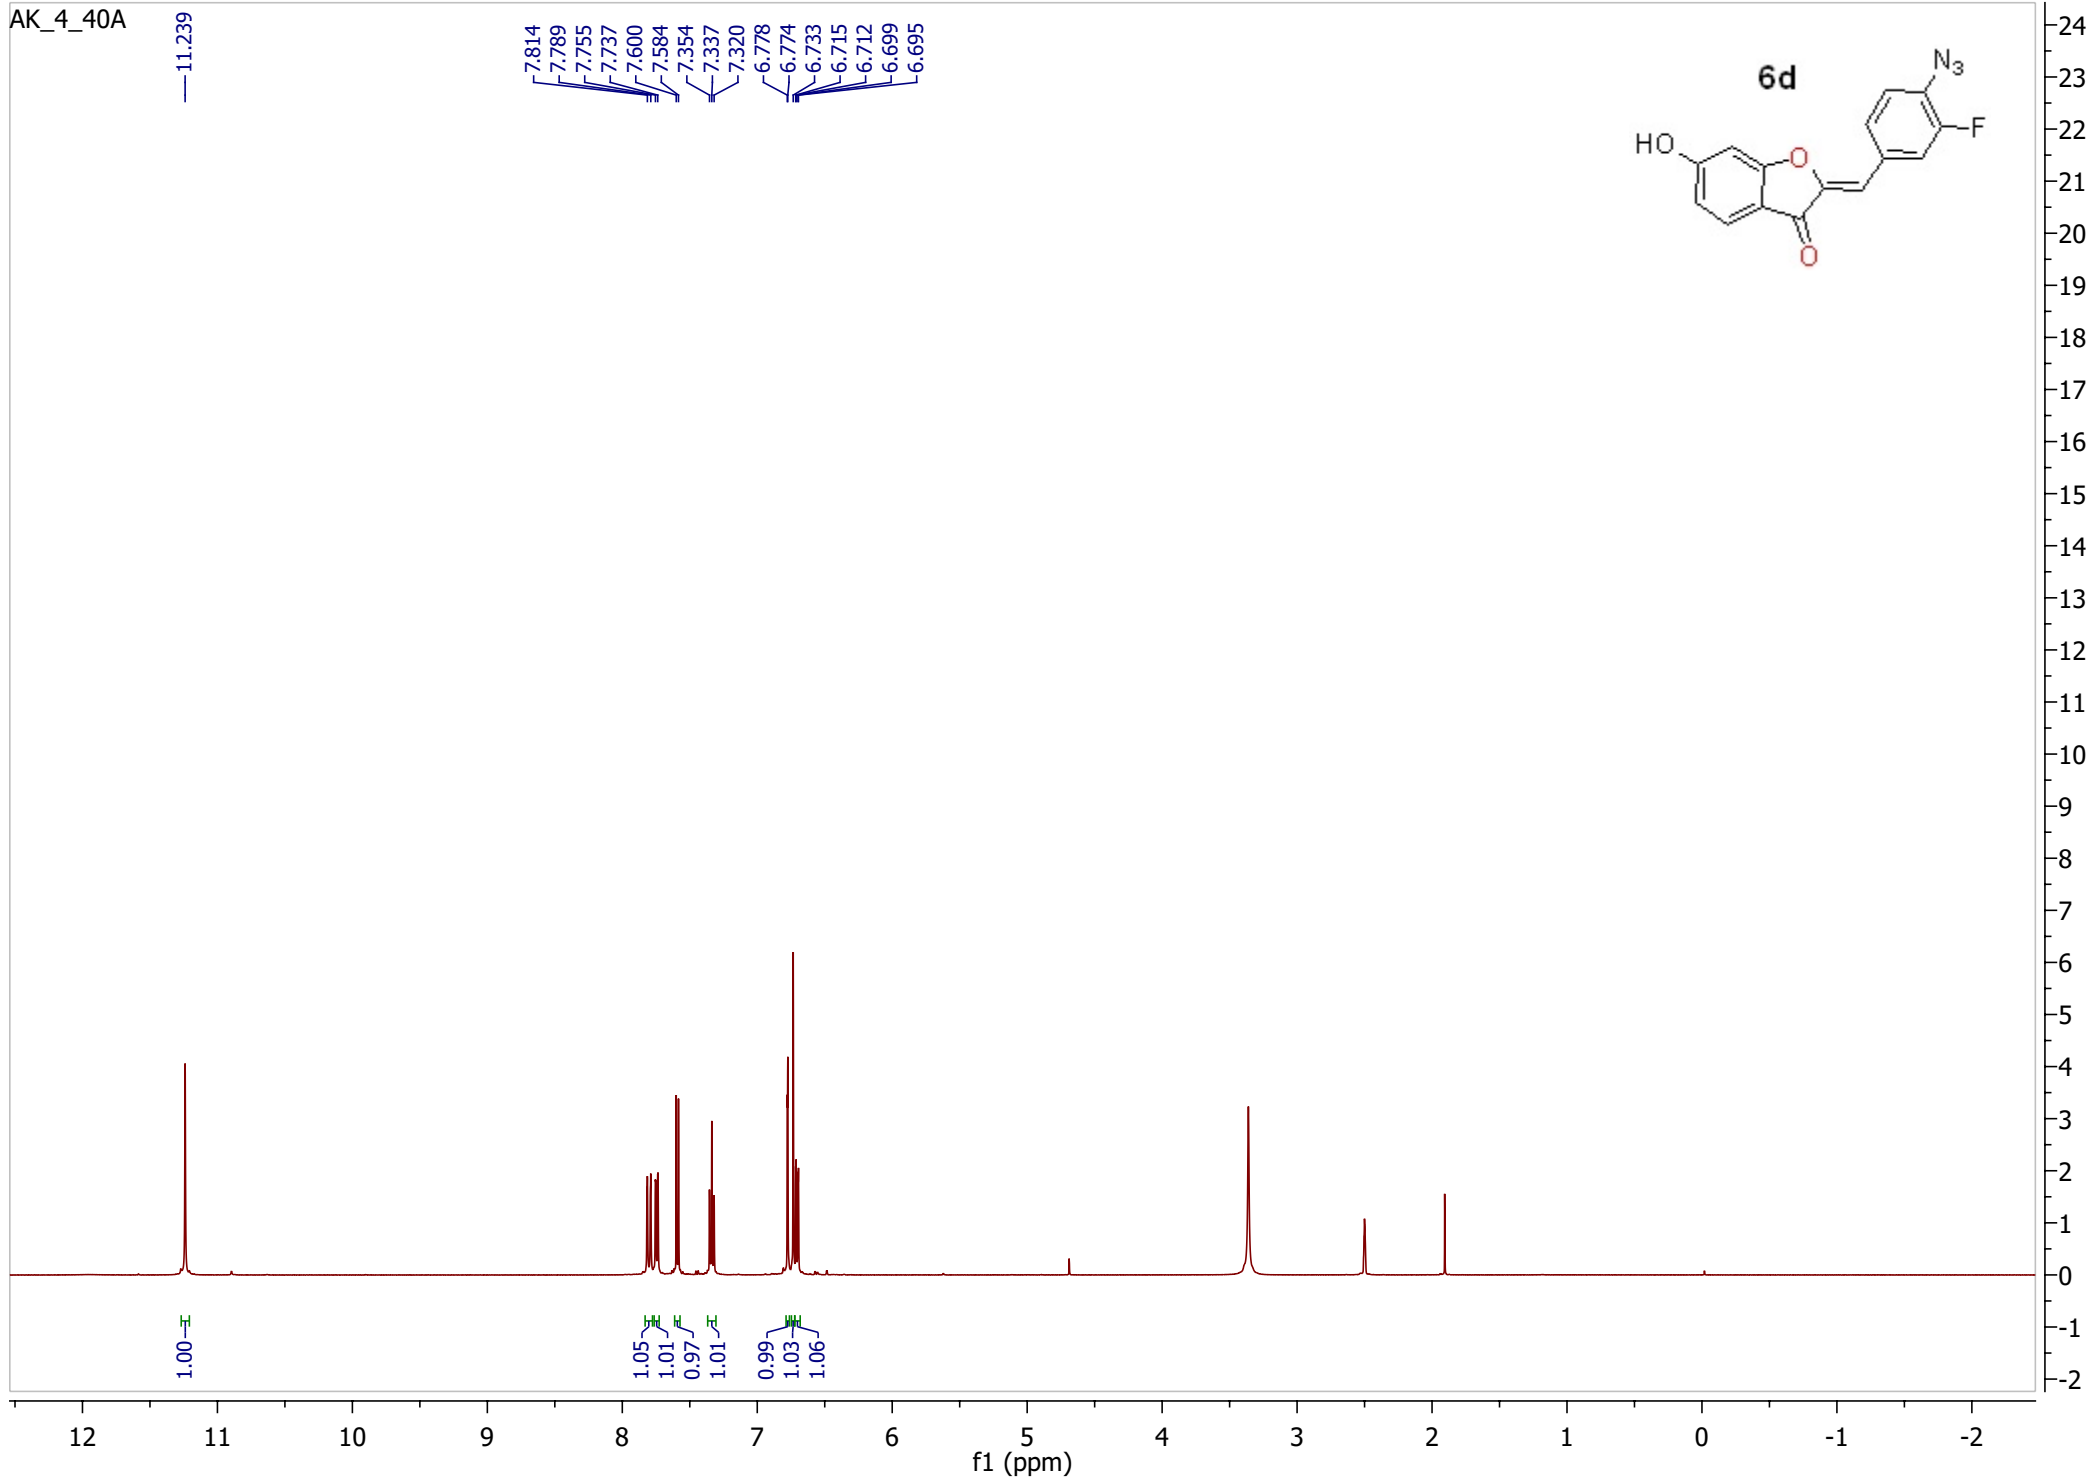

AK\_4\_40A\_13C

181.204  
167.880  
166.709  
155.157  
151.885  
147.588  
130.326  
130.223  
128.278  
128.232  
128.136  
126.001  
121.754  
118.430  
118.164  
113.179  
112.610  
108.448  
108.416  
98.742

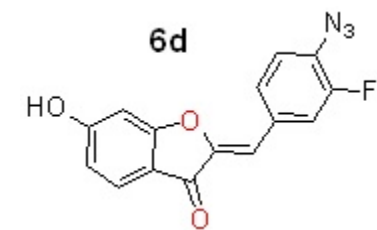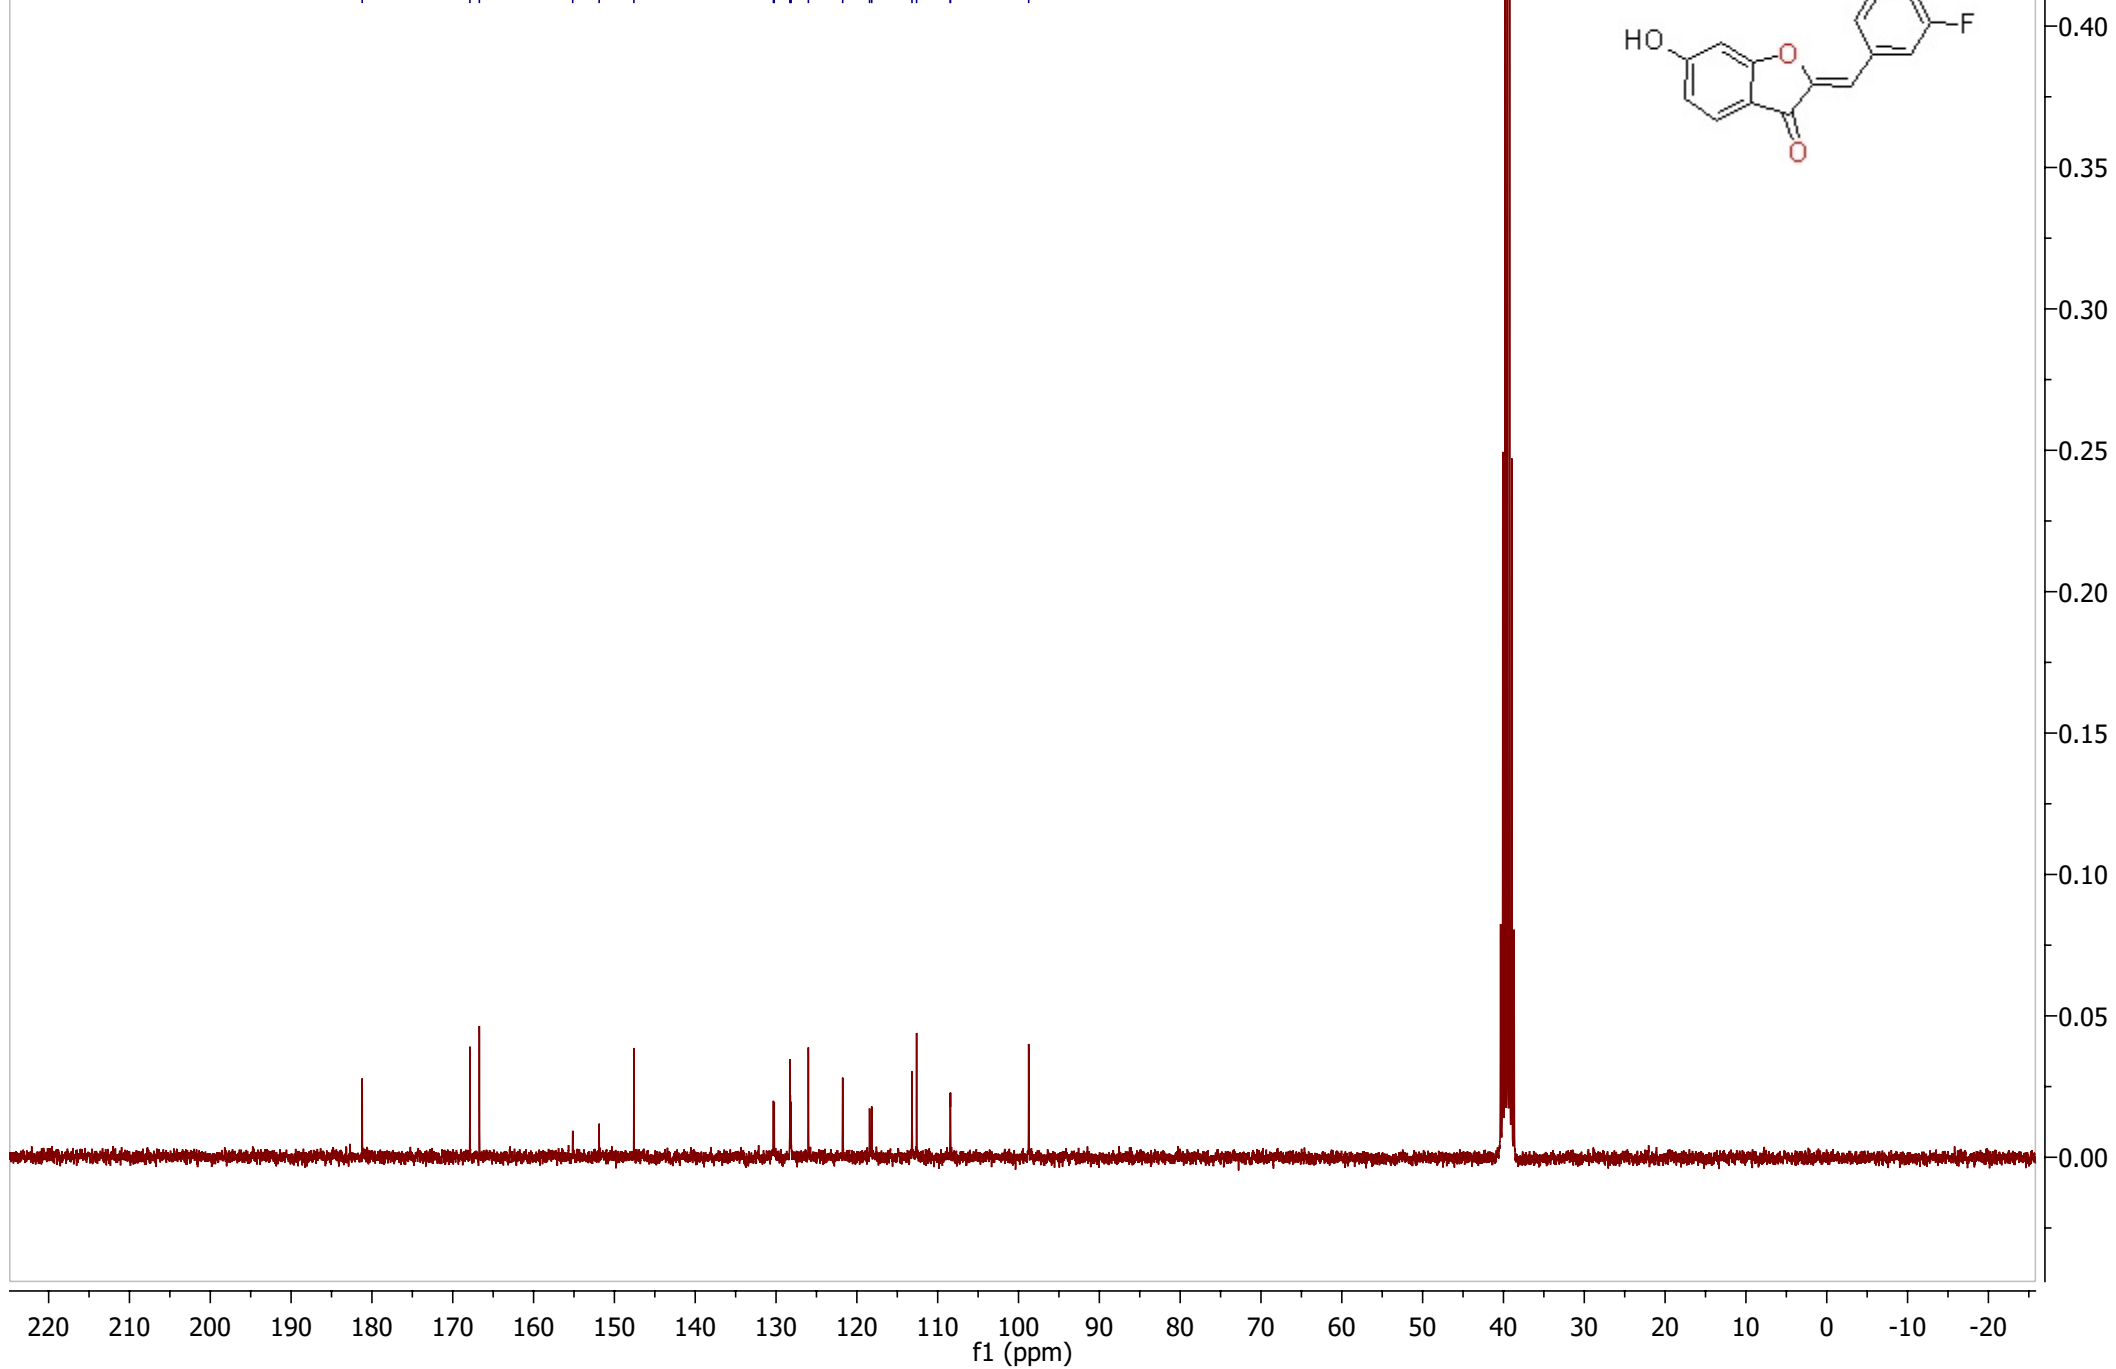

AK\_4\_40B

7.652  
7.627  
7.590  
7.584  
7.573  
7.567  
7.510  
7.494  
6.836  
6.823  
6.792  
6.685  
5.961

1.987  
1.853

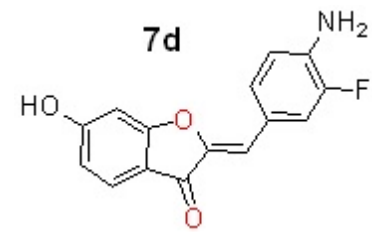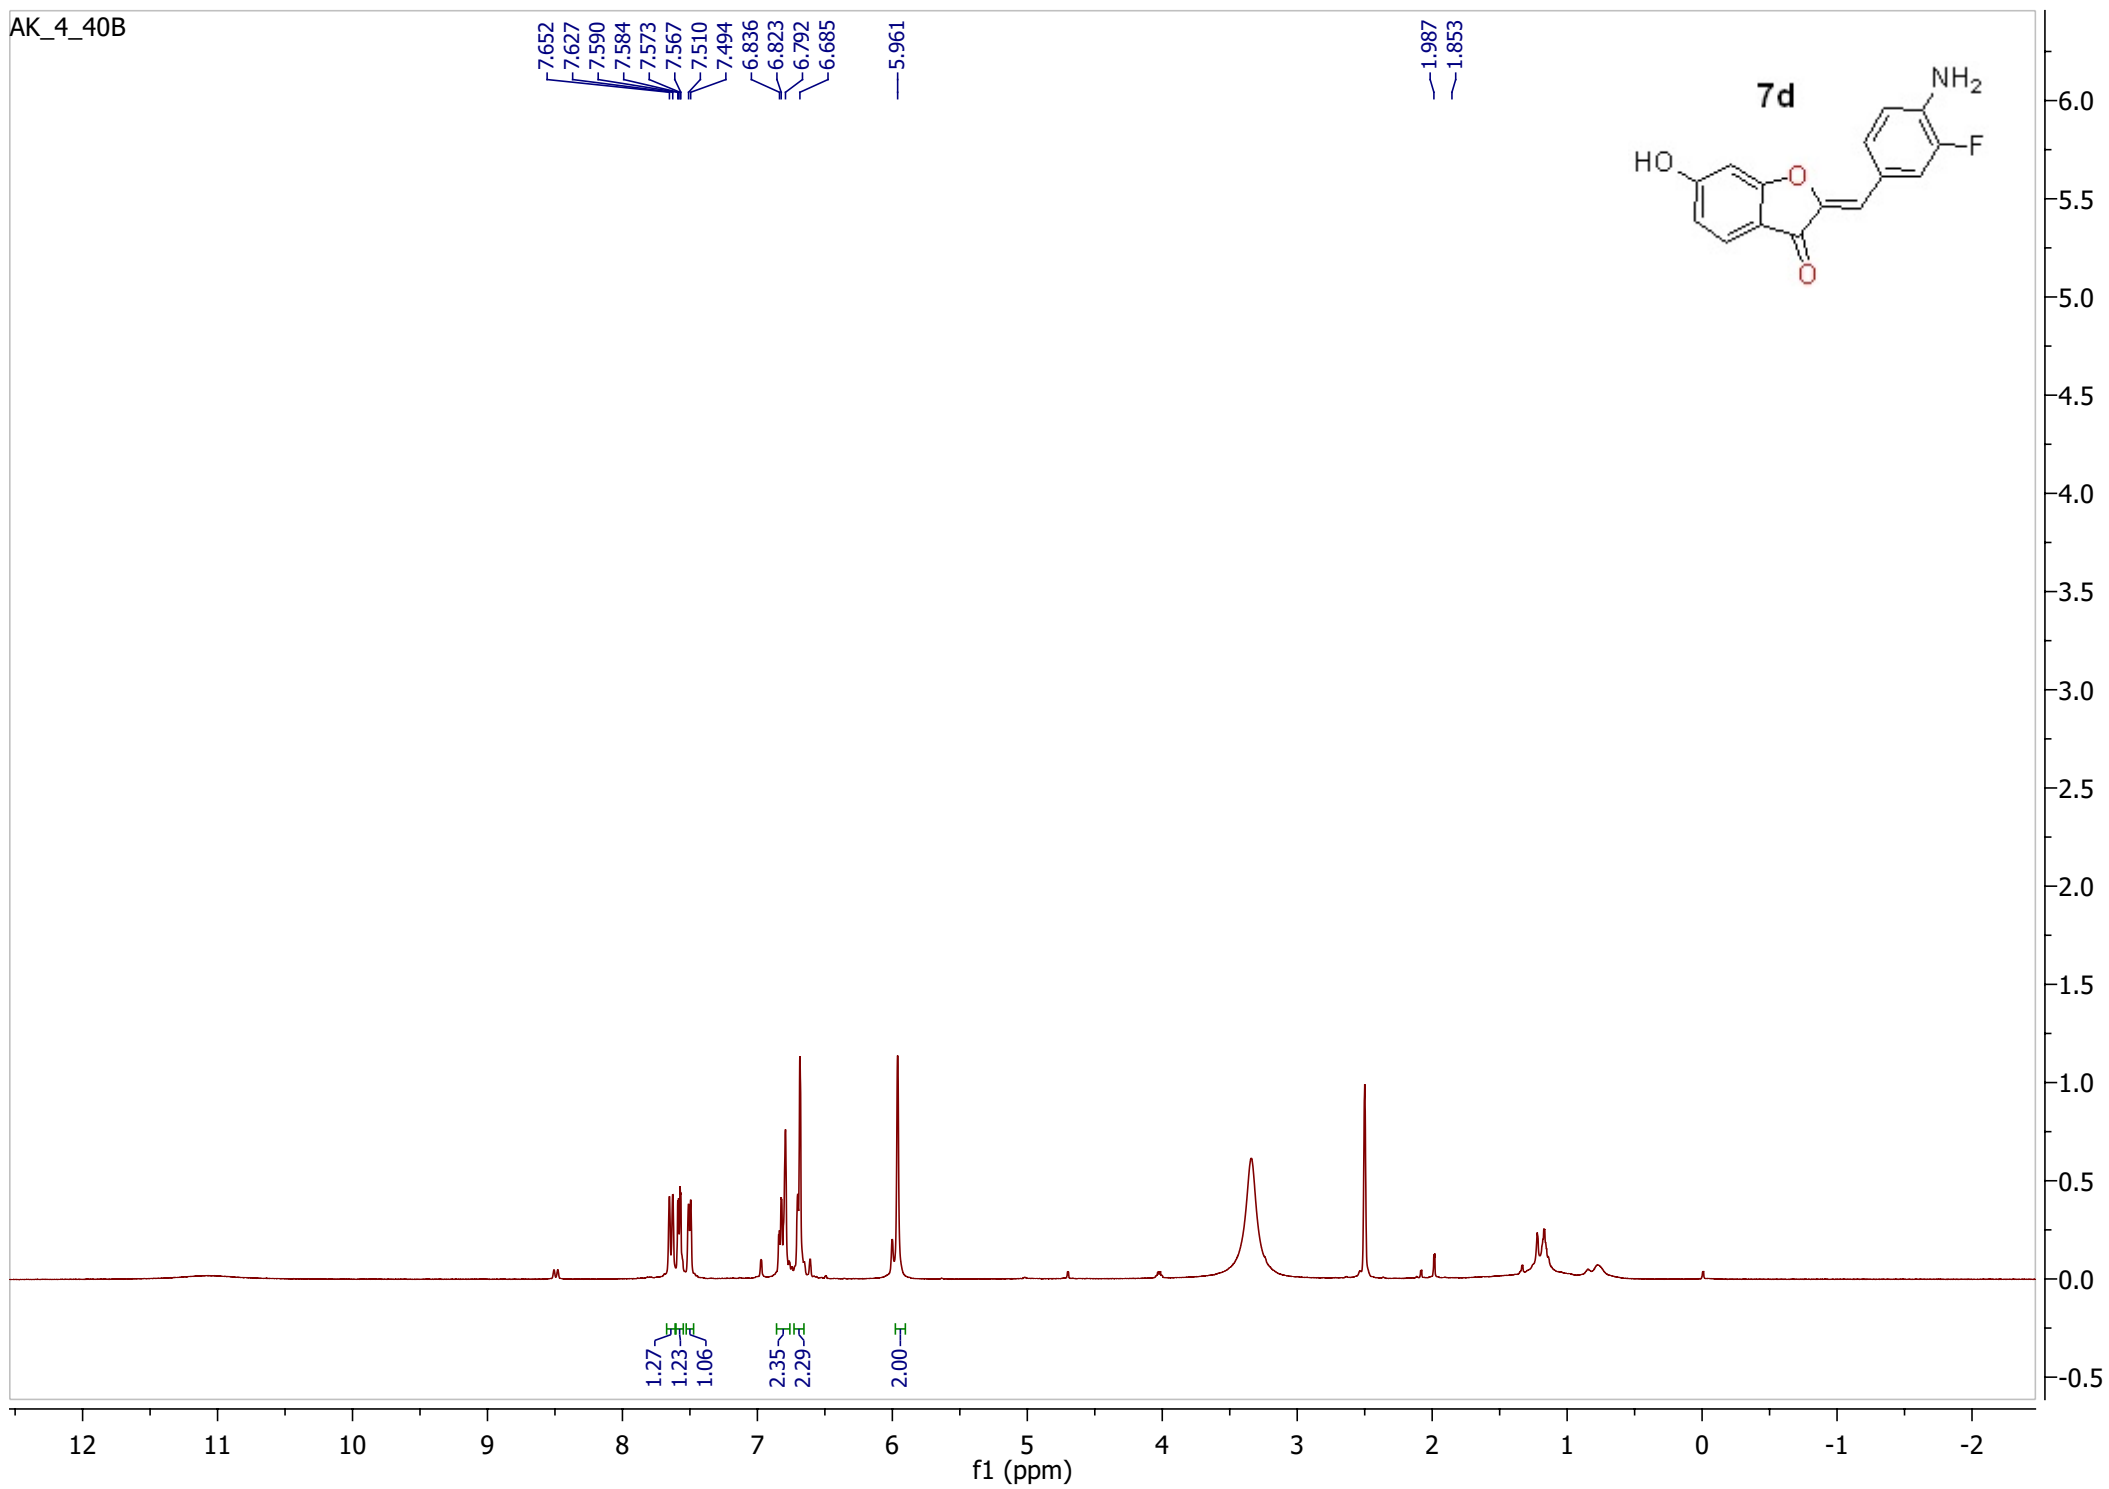

AK\_4\_40B\_13C

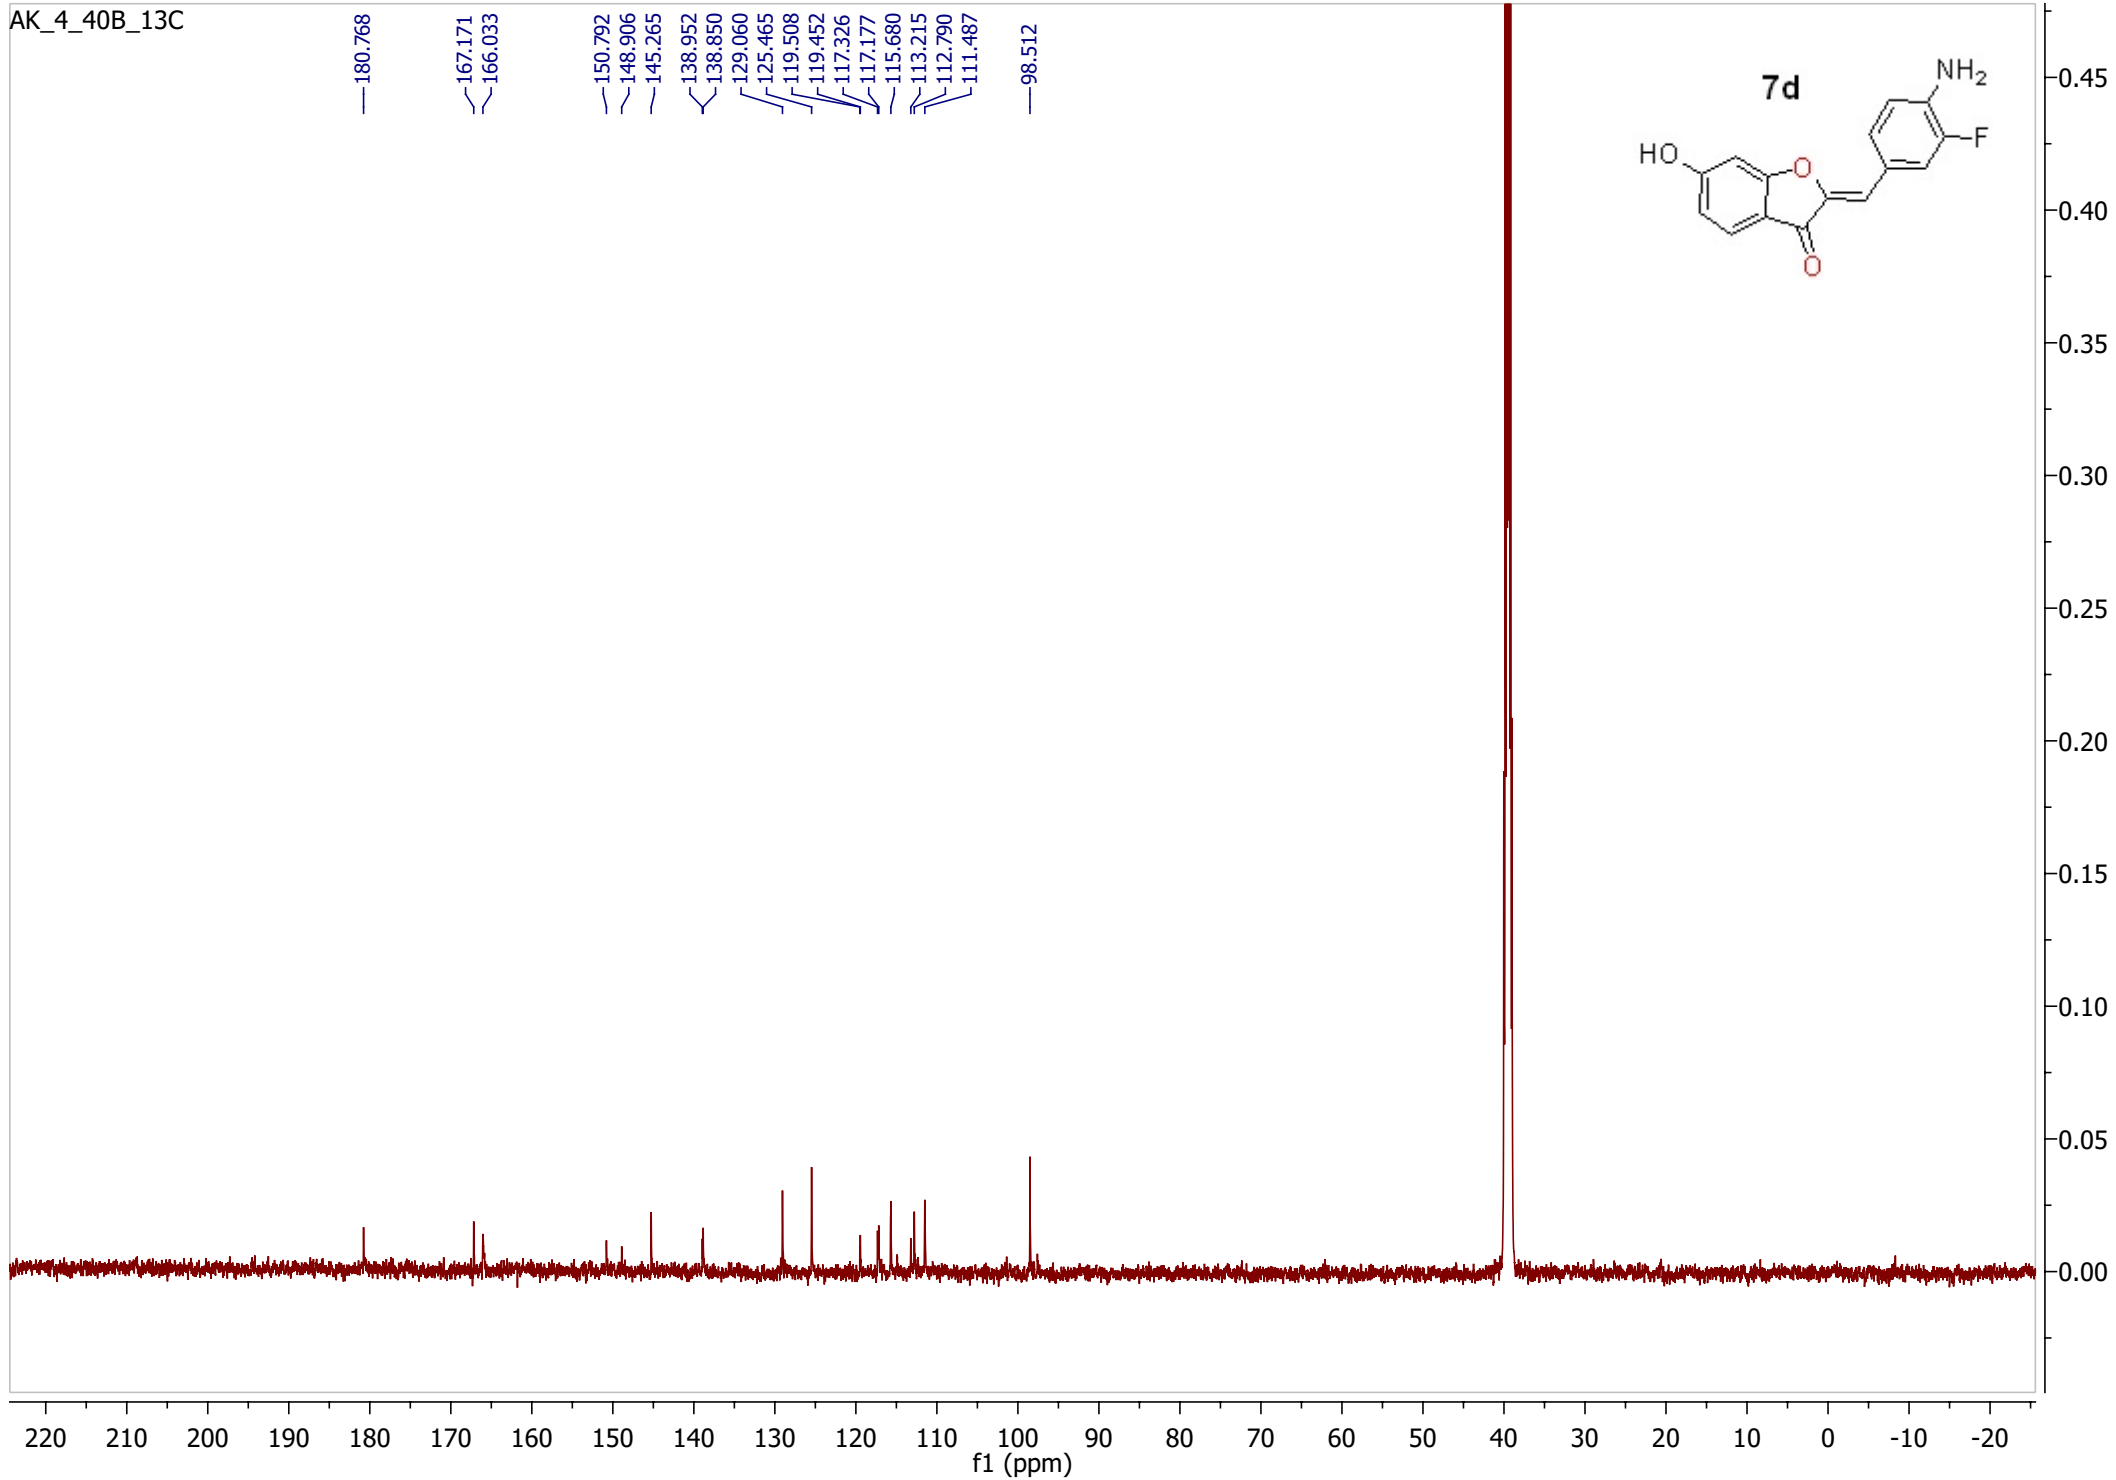

AK\_4\_33\_1H

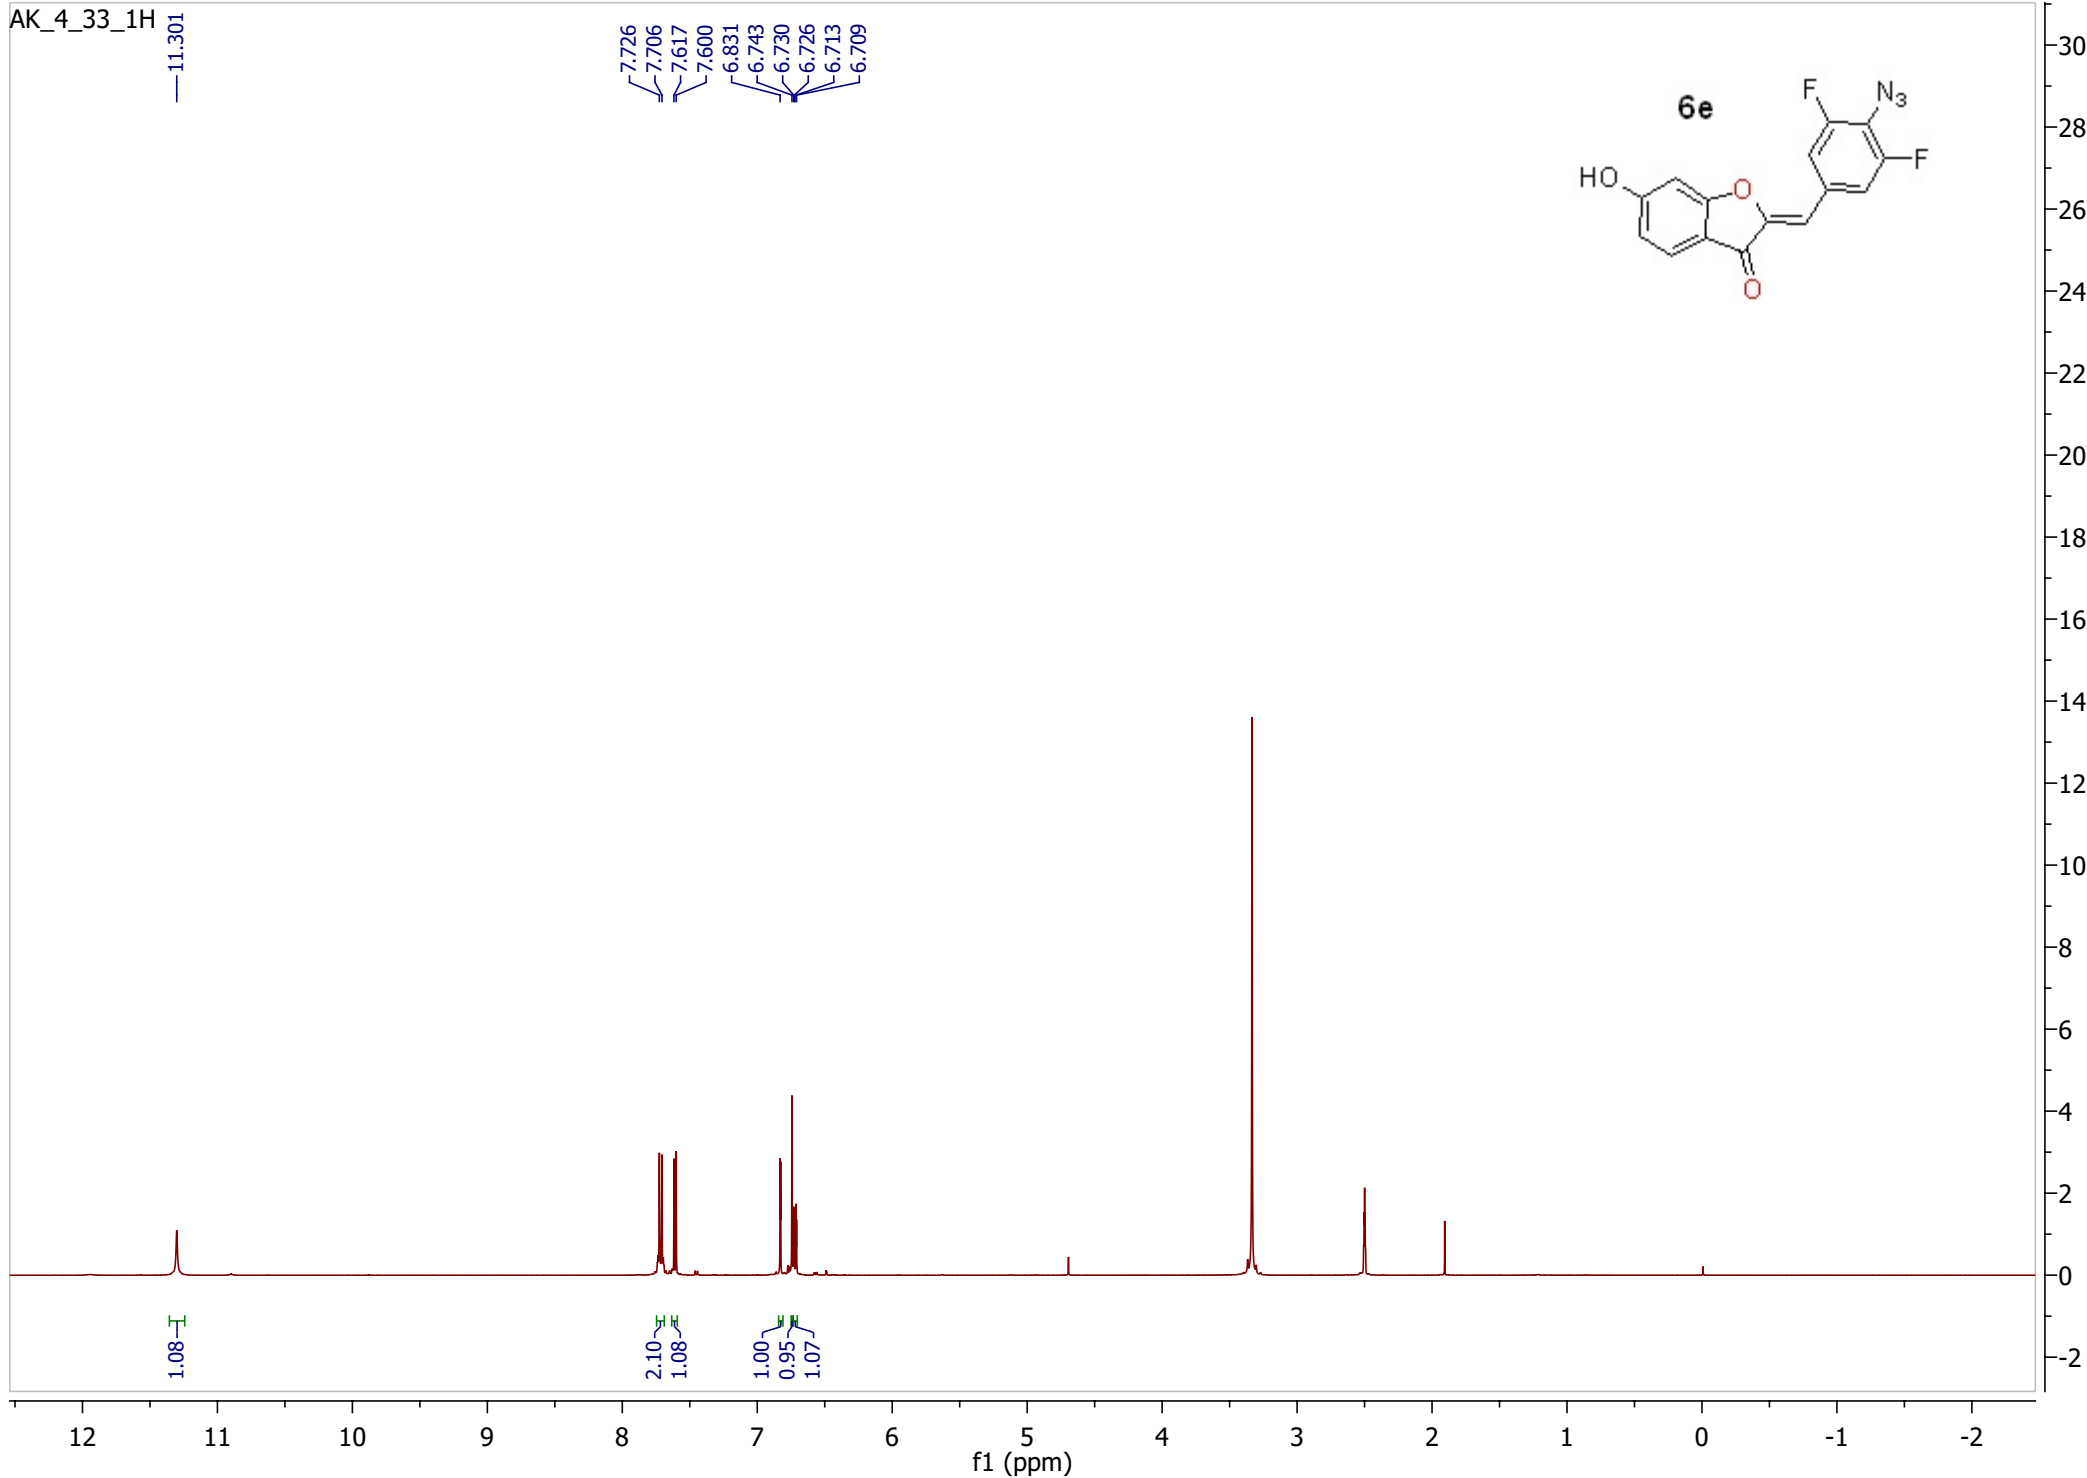

AK\_4\_33\_13C

181.017  
167.922  
166.828  
155.694  
153.727  
148.044  
129.668  
129.588  
129.508  
125.963  
114.366  
114.210  
113.239  
112.345  
107.266  
98.826

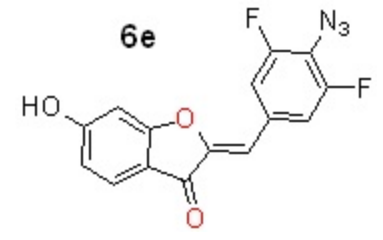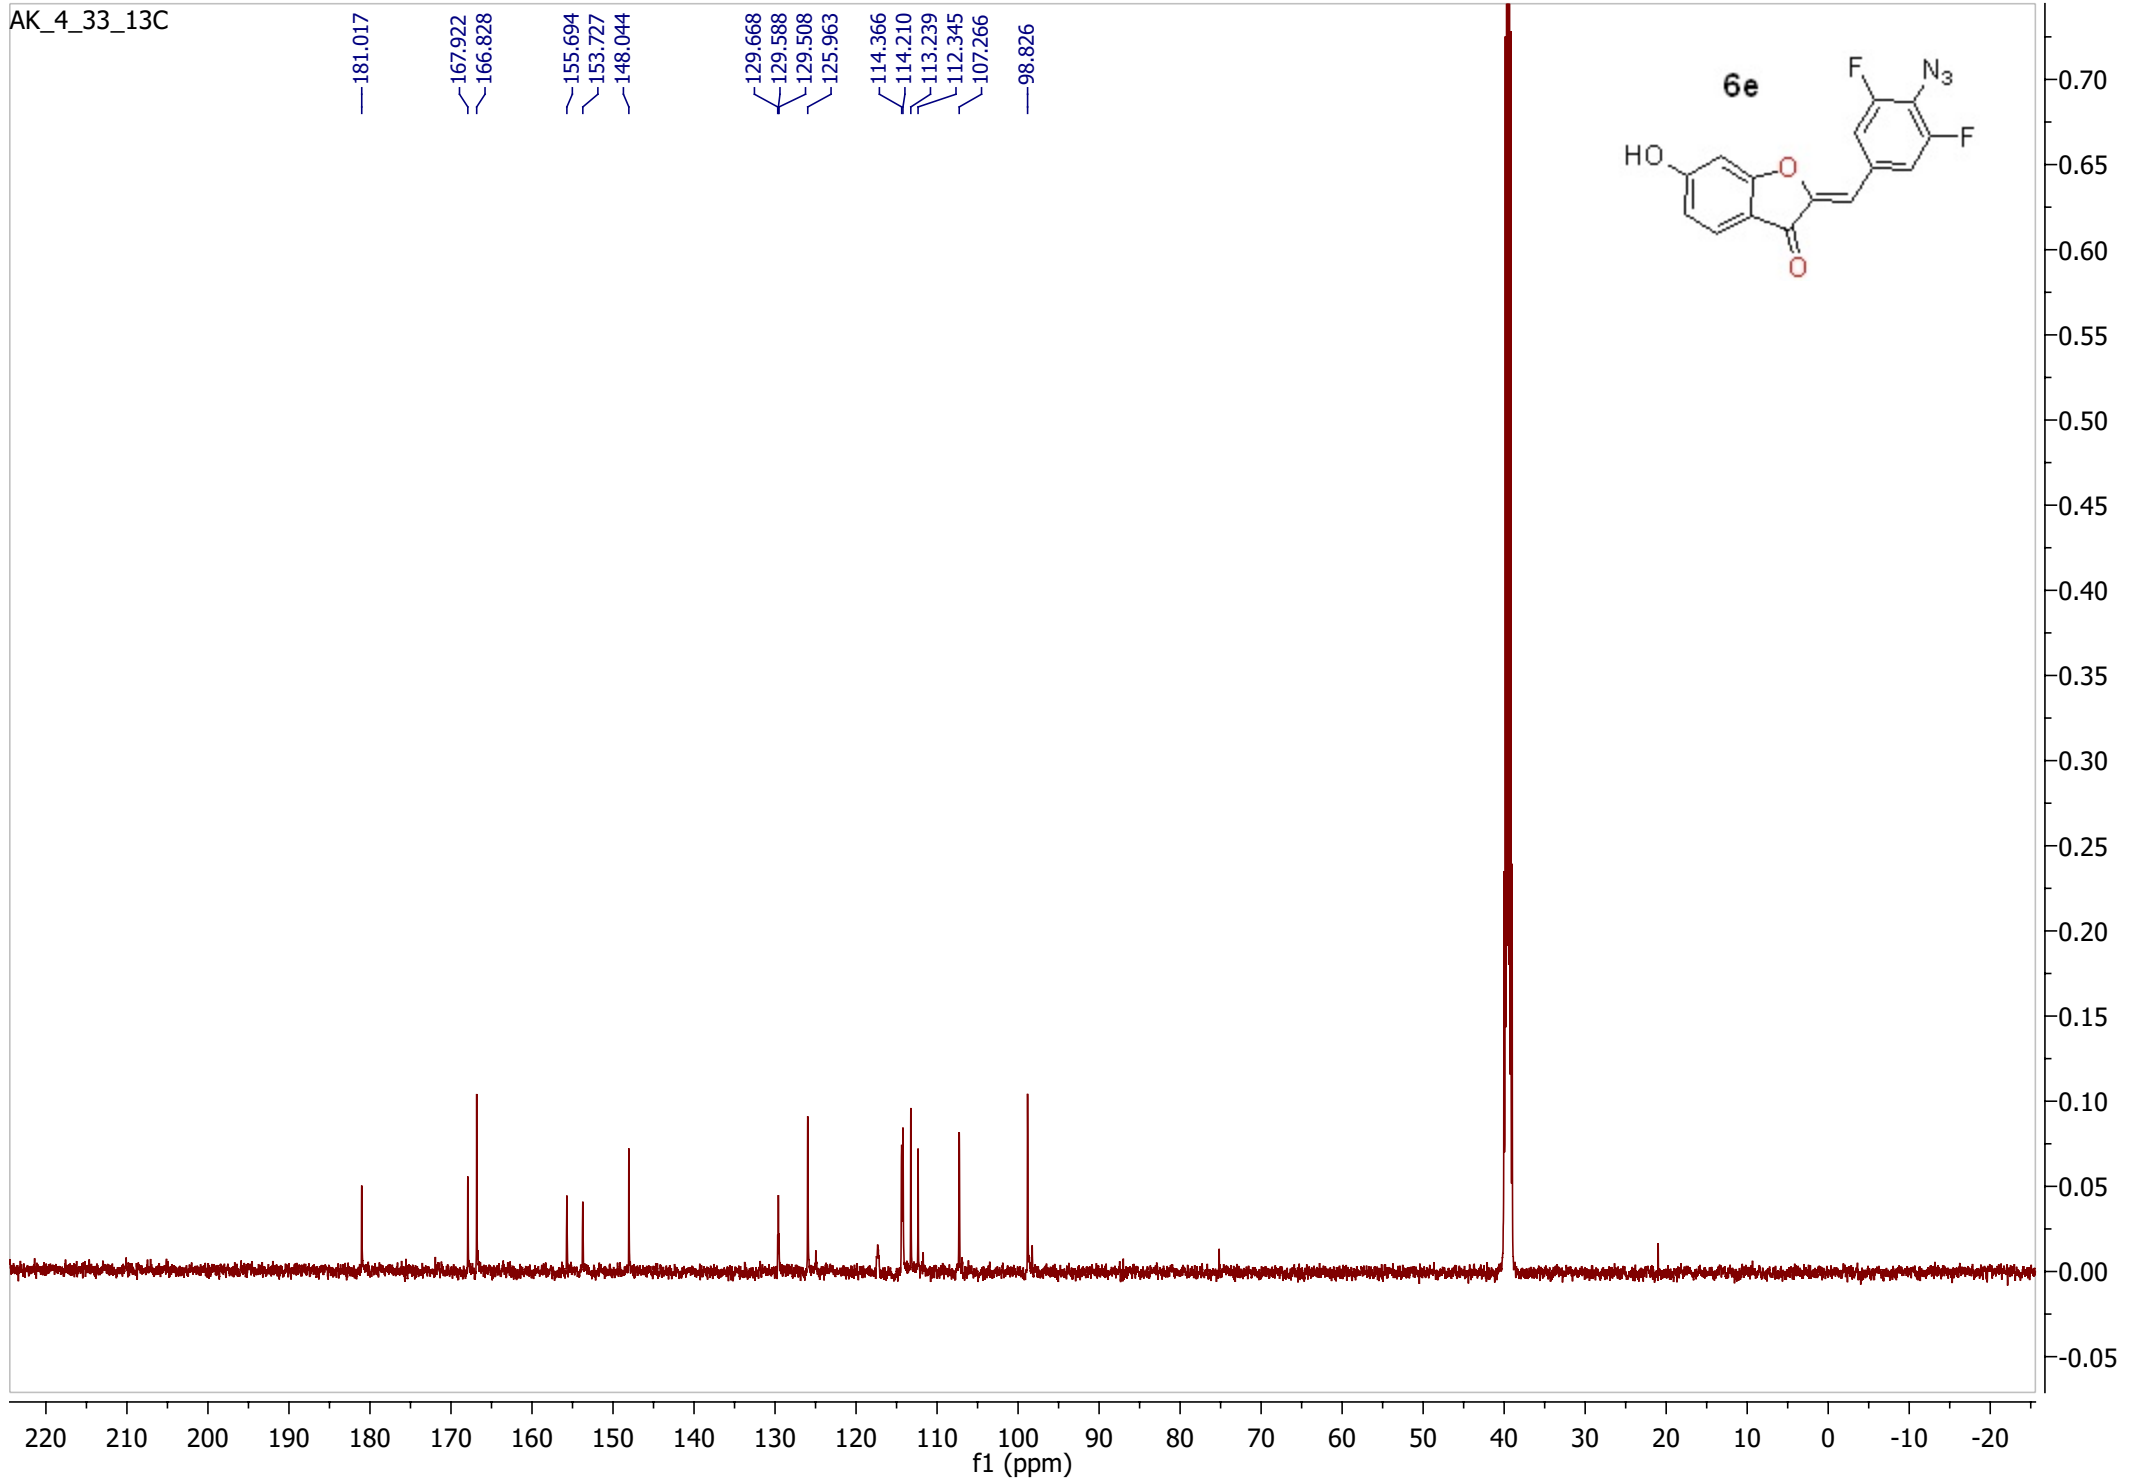



AK\_5\_39

11.375

7.593  
7.564  
7.555  
7.536  
7.528  
6.811  
6.805  
6.710  
6.688

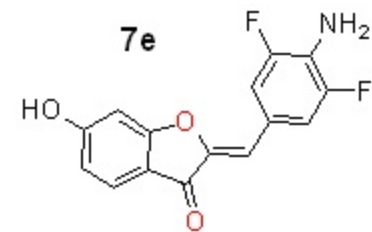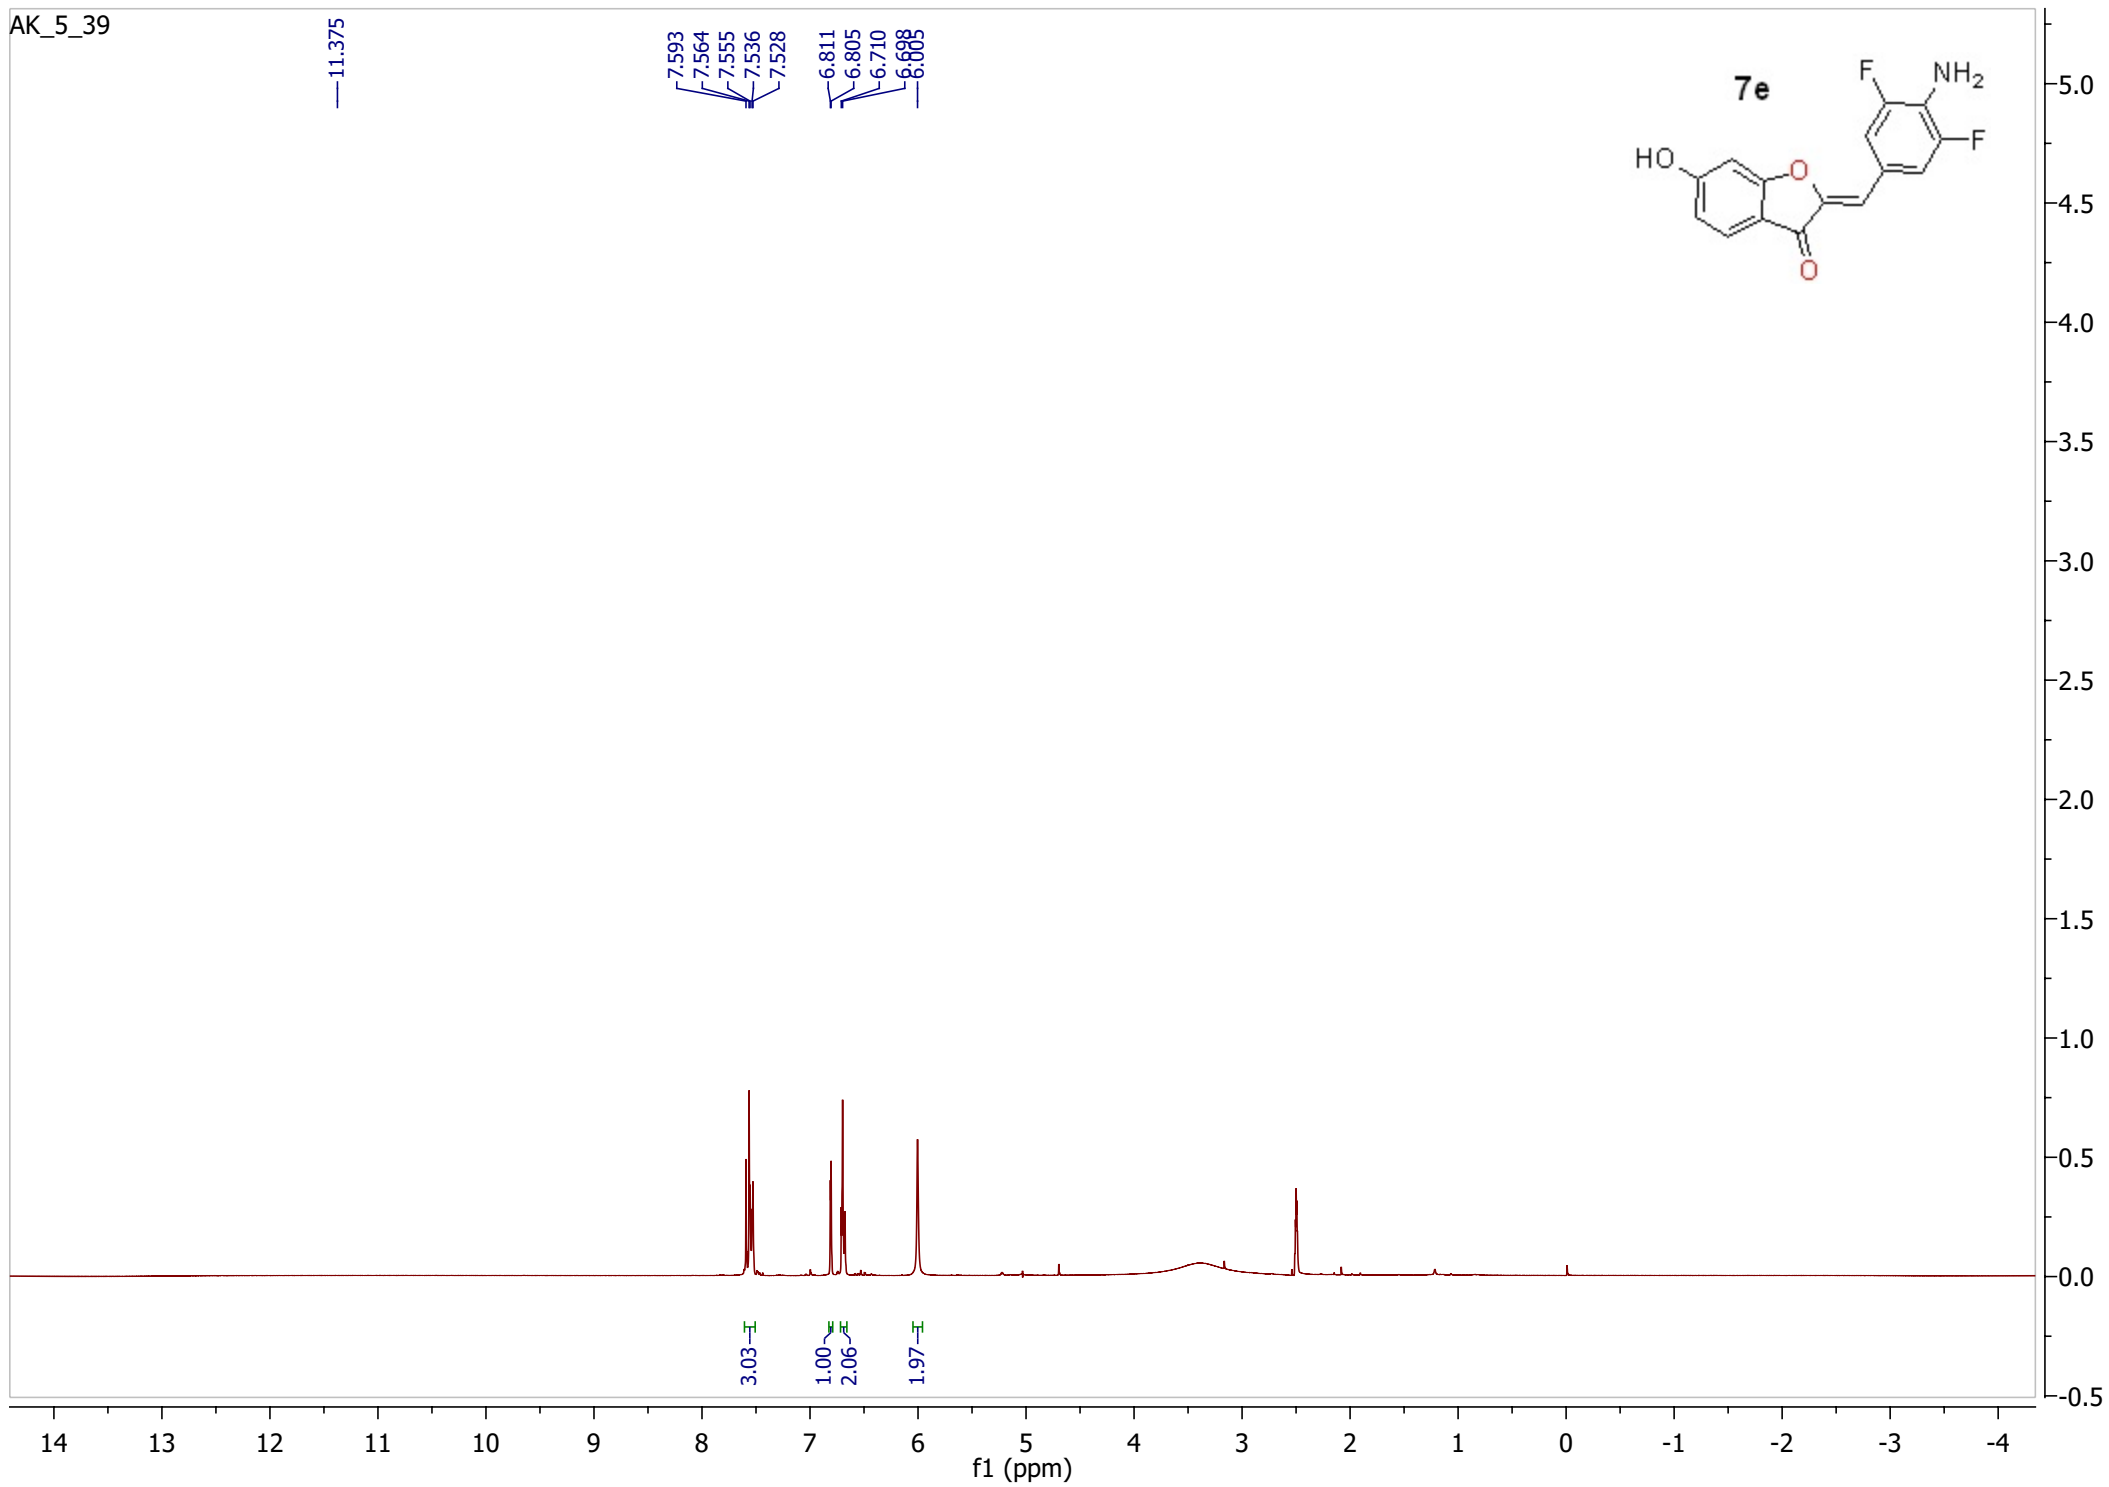

AK\_5\_39\_C13

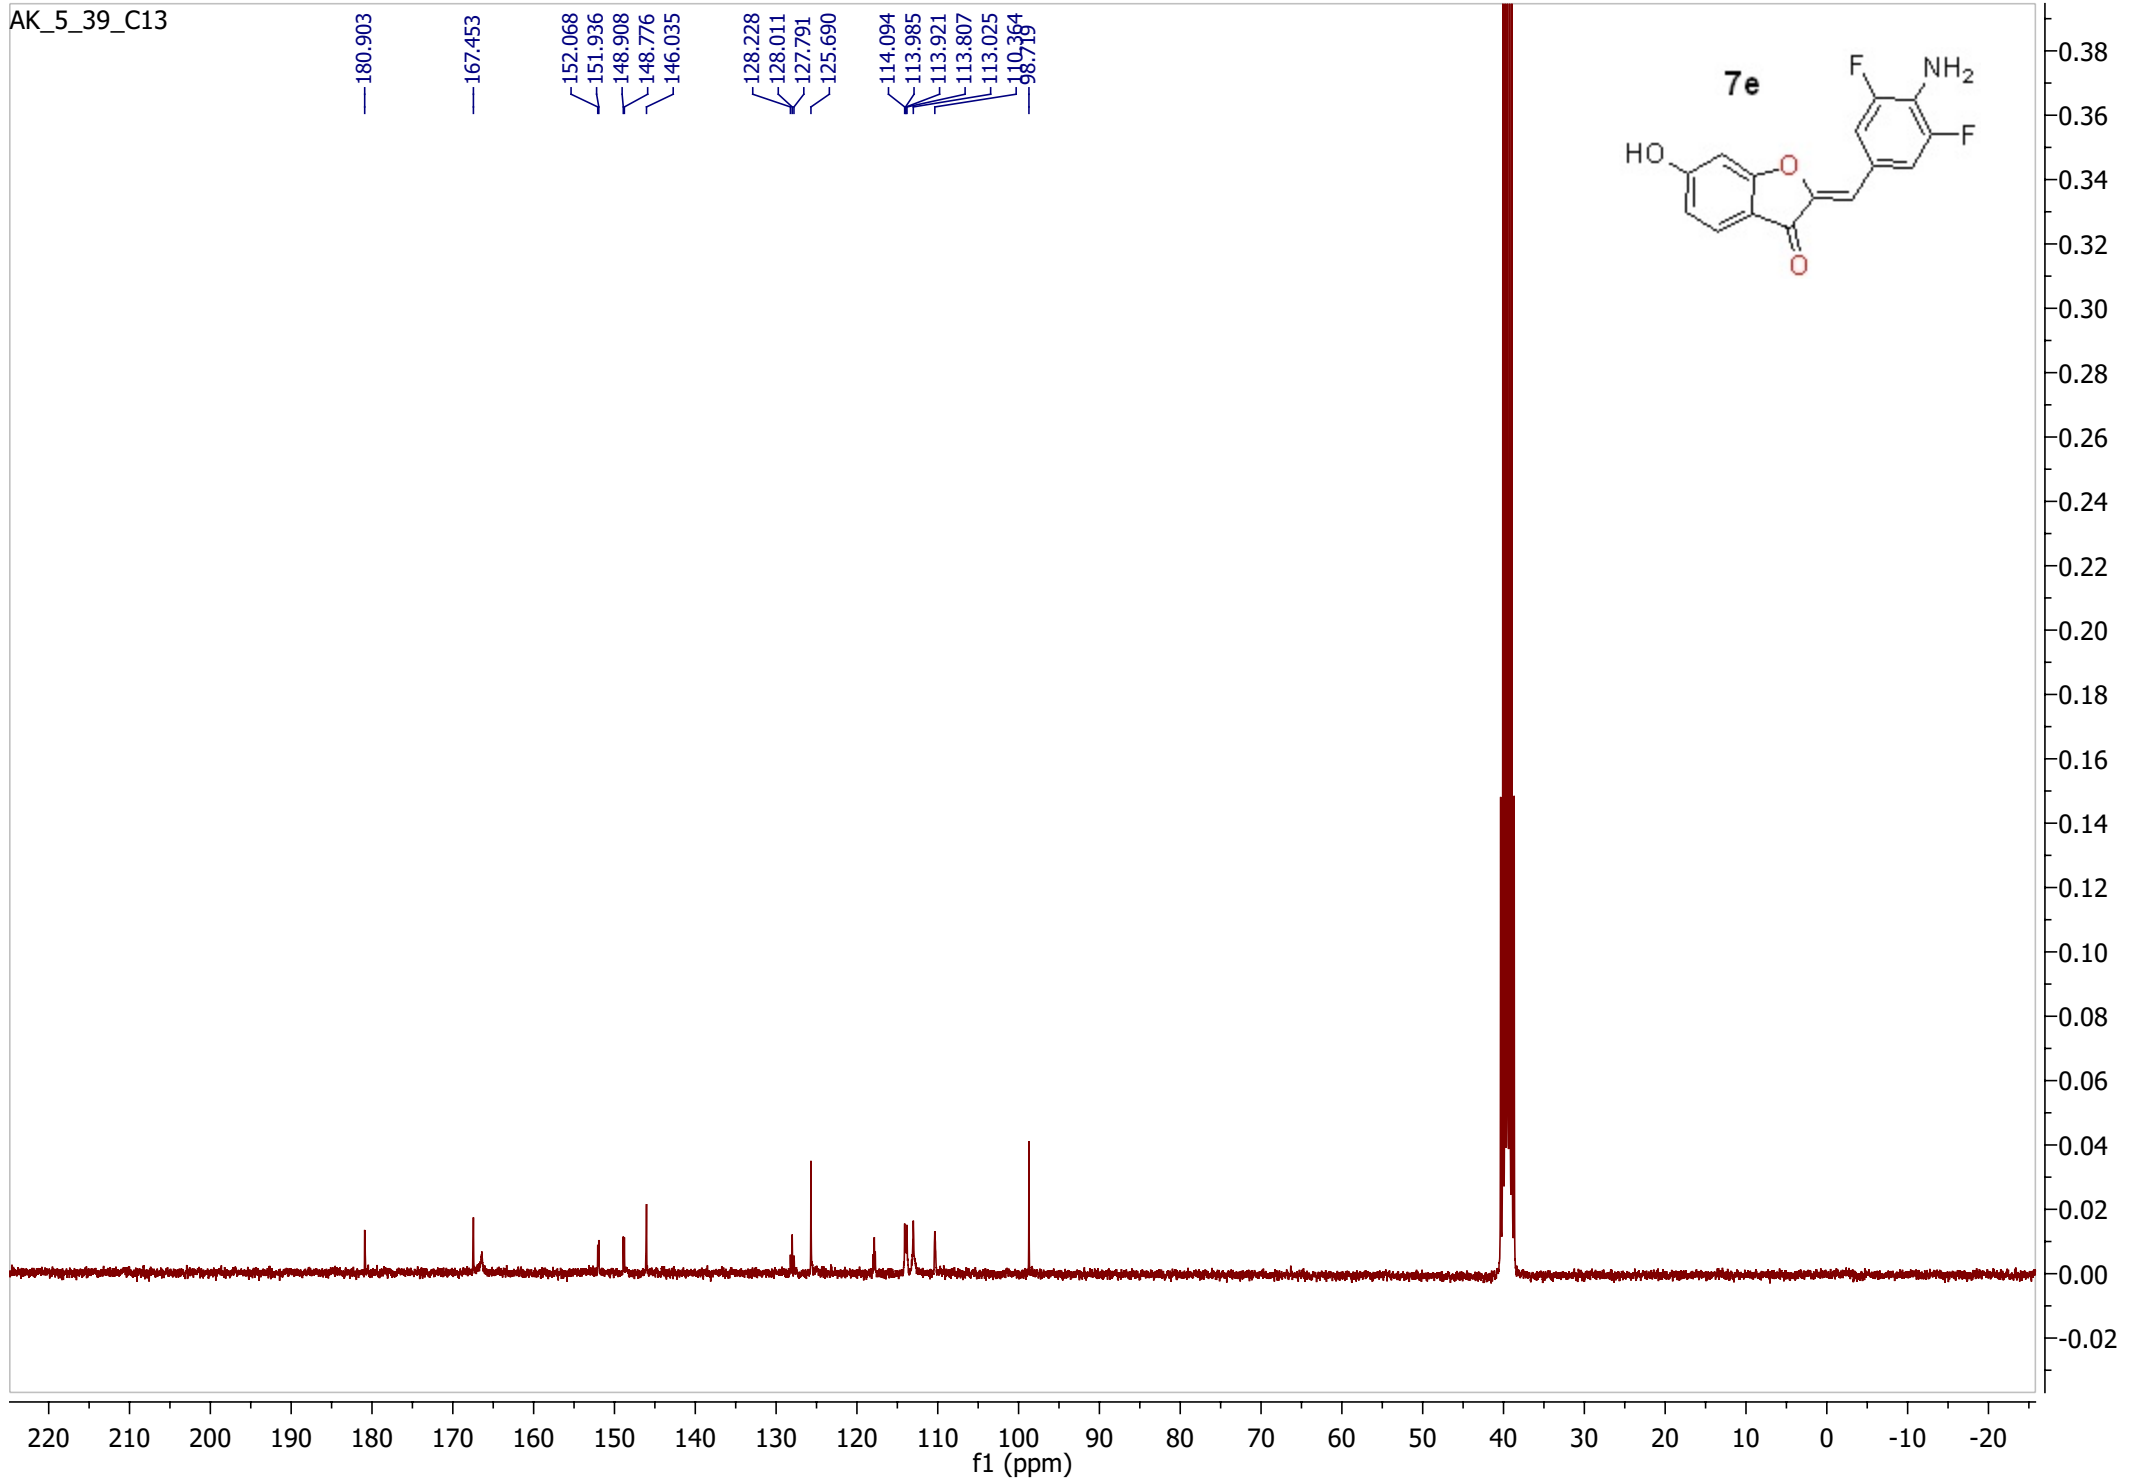

AK-4-32-1H-dmso

11.271  
1.03

7.770  
7.737  
7.585  
7.558  
7.531  
6.938  
6.911  
6.761  
6.666  
6.639  
1.84  
1.15  
1.08  
1.00  
1.10

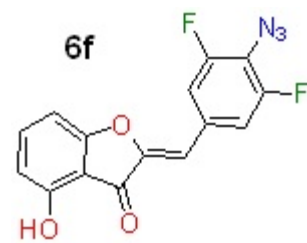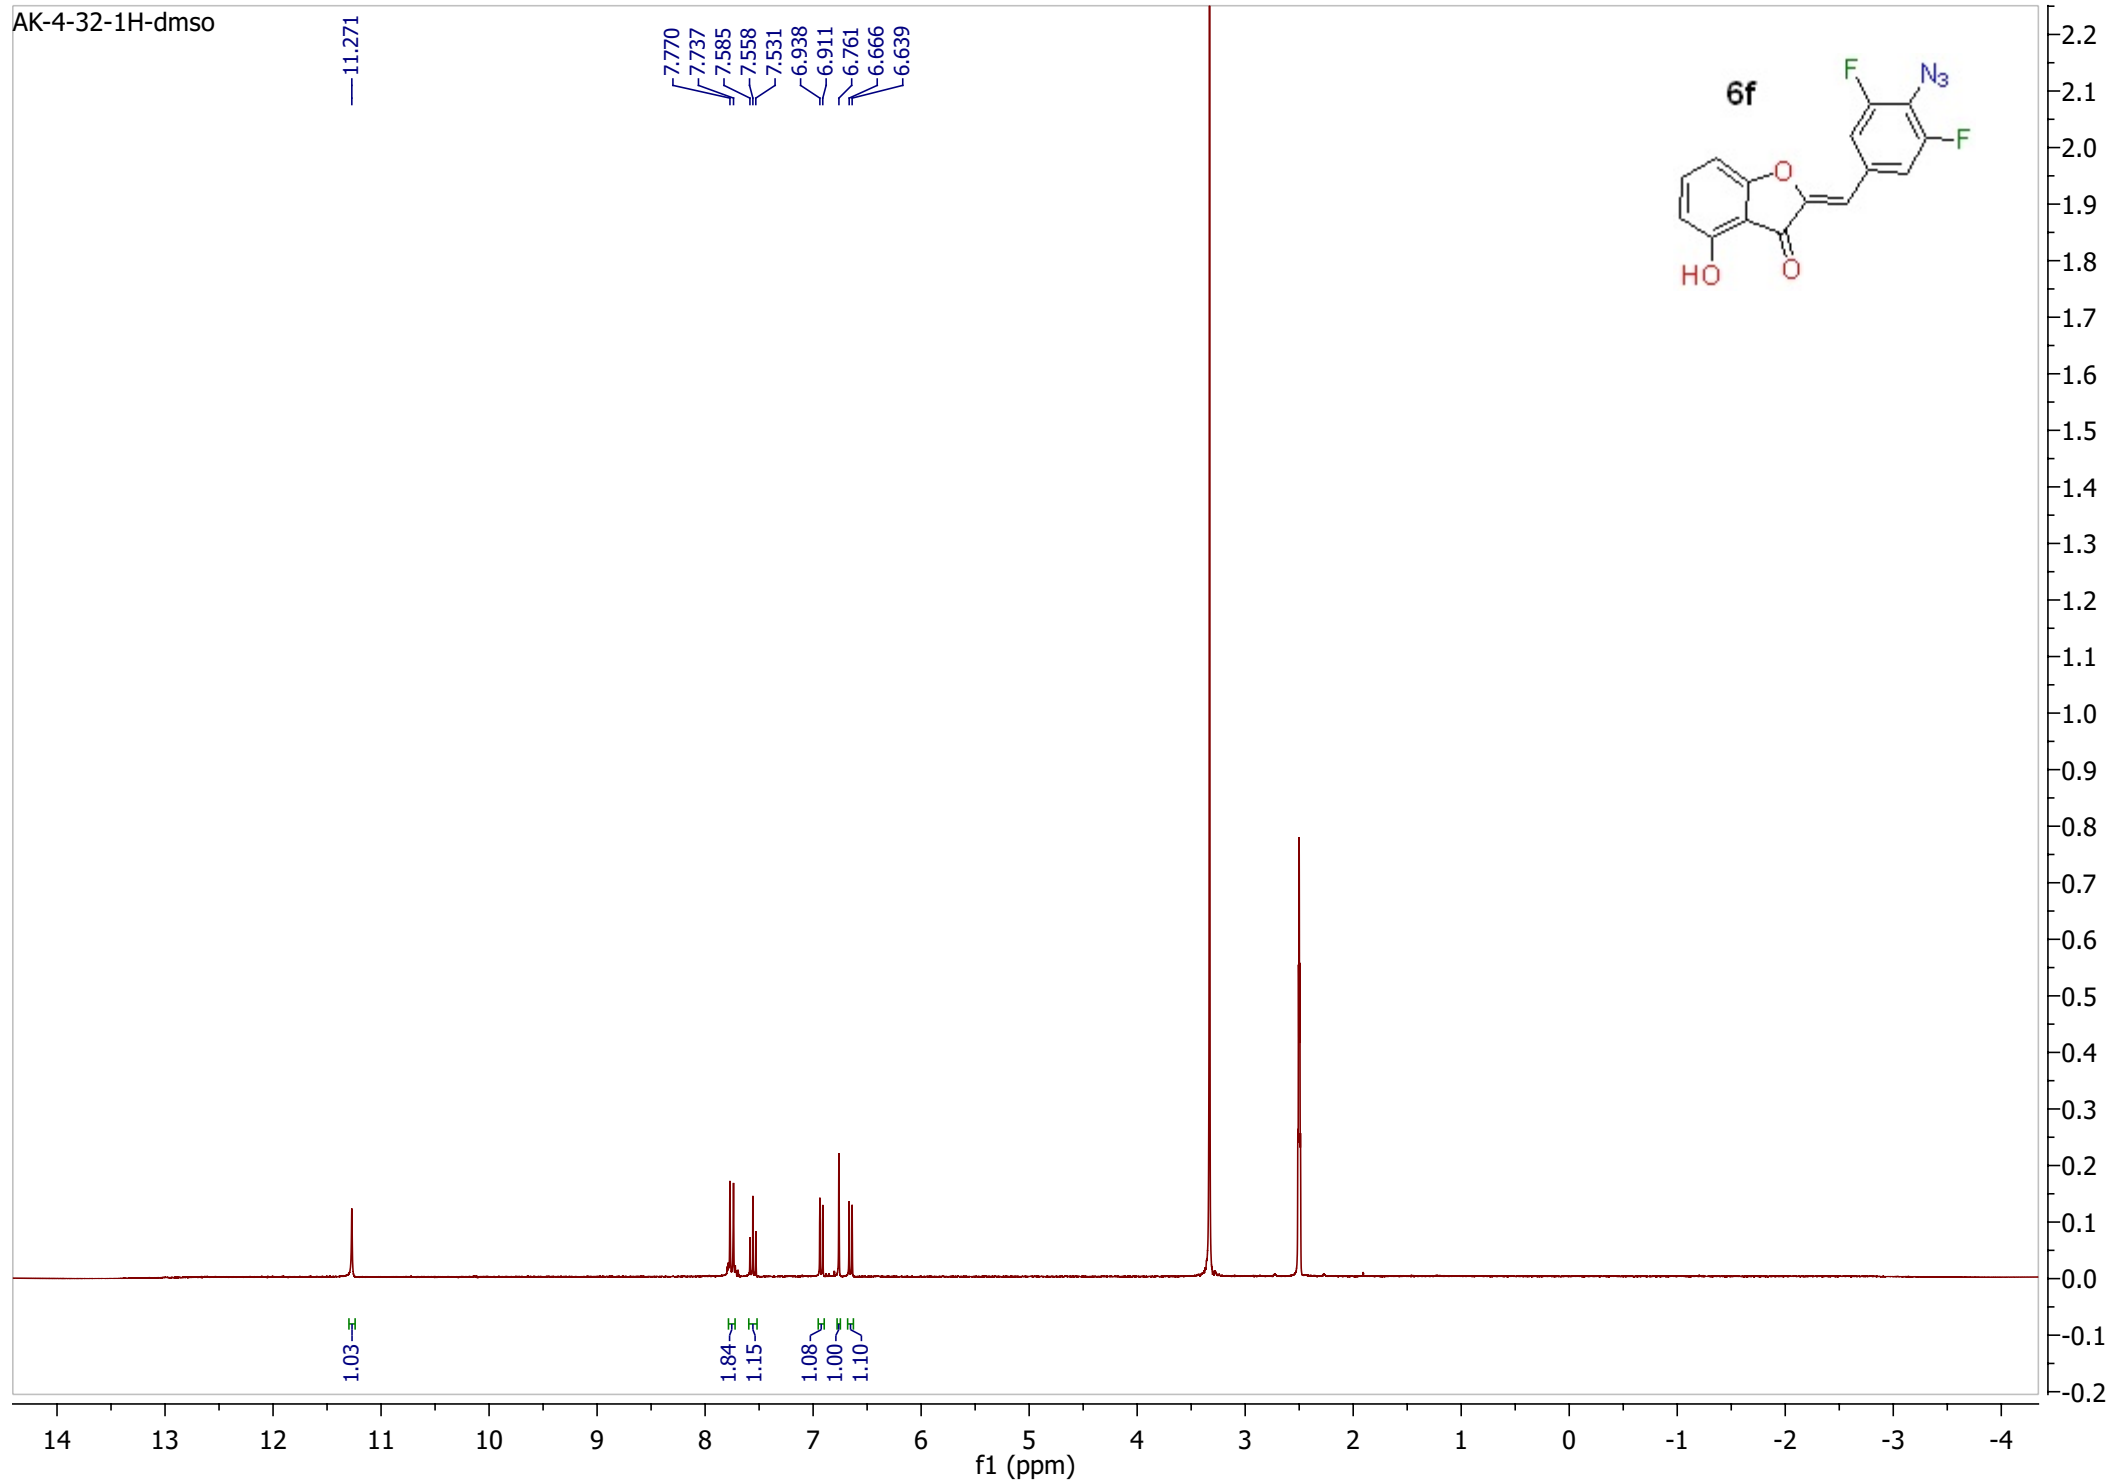

AK\_4132\_C13

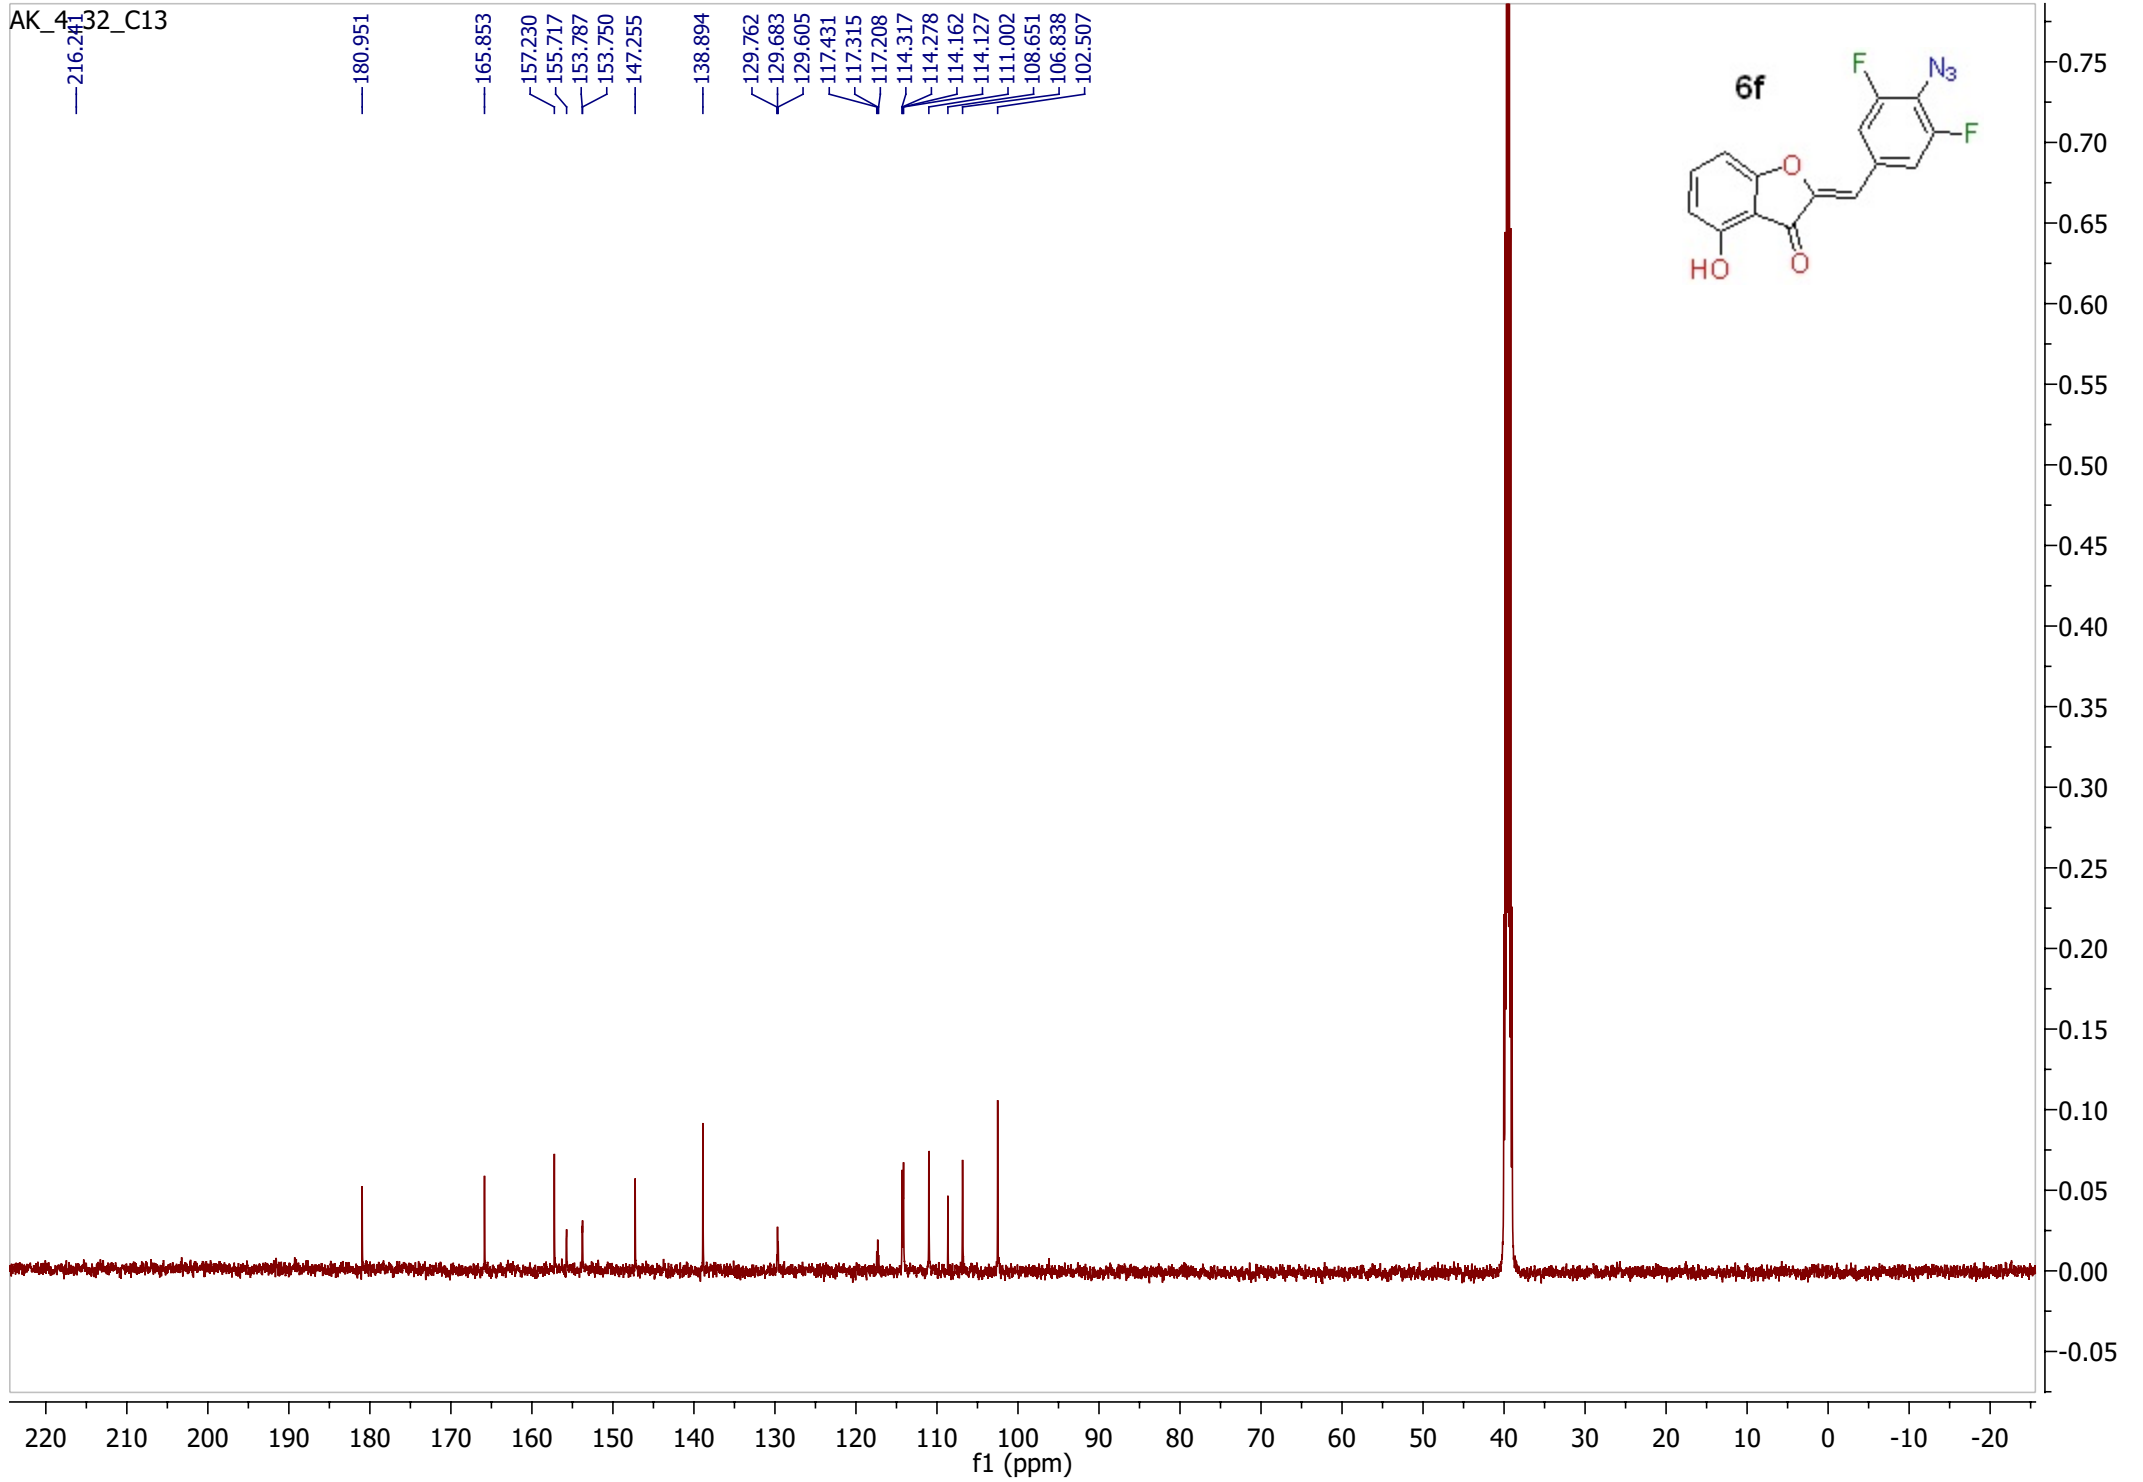

AK\_5\_41\_1H

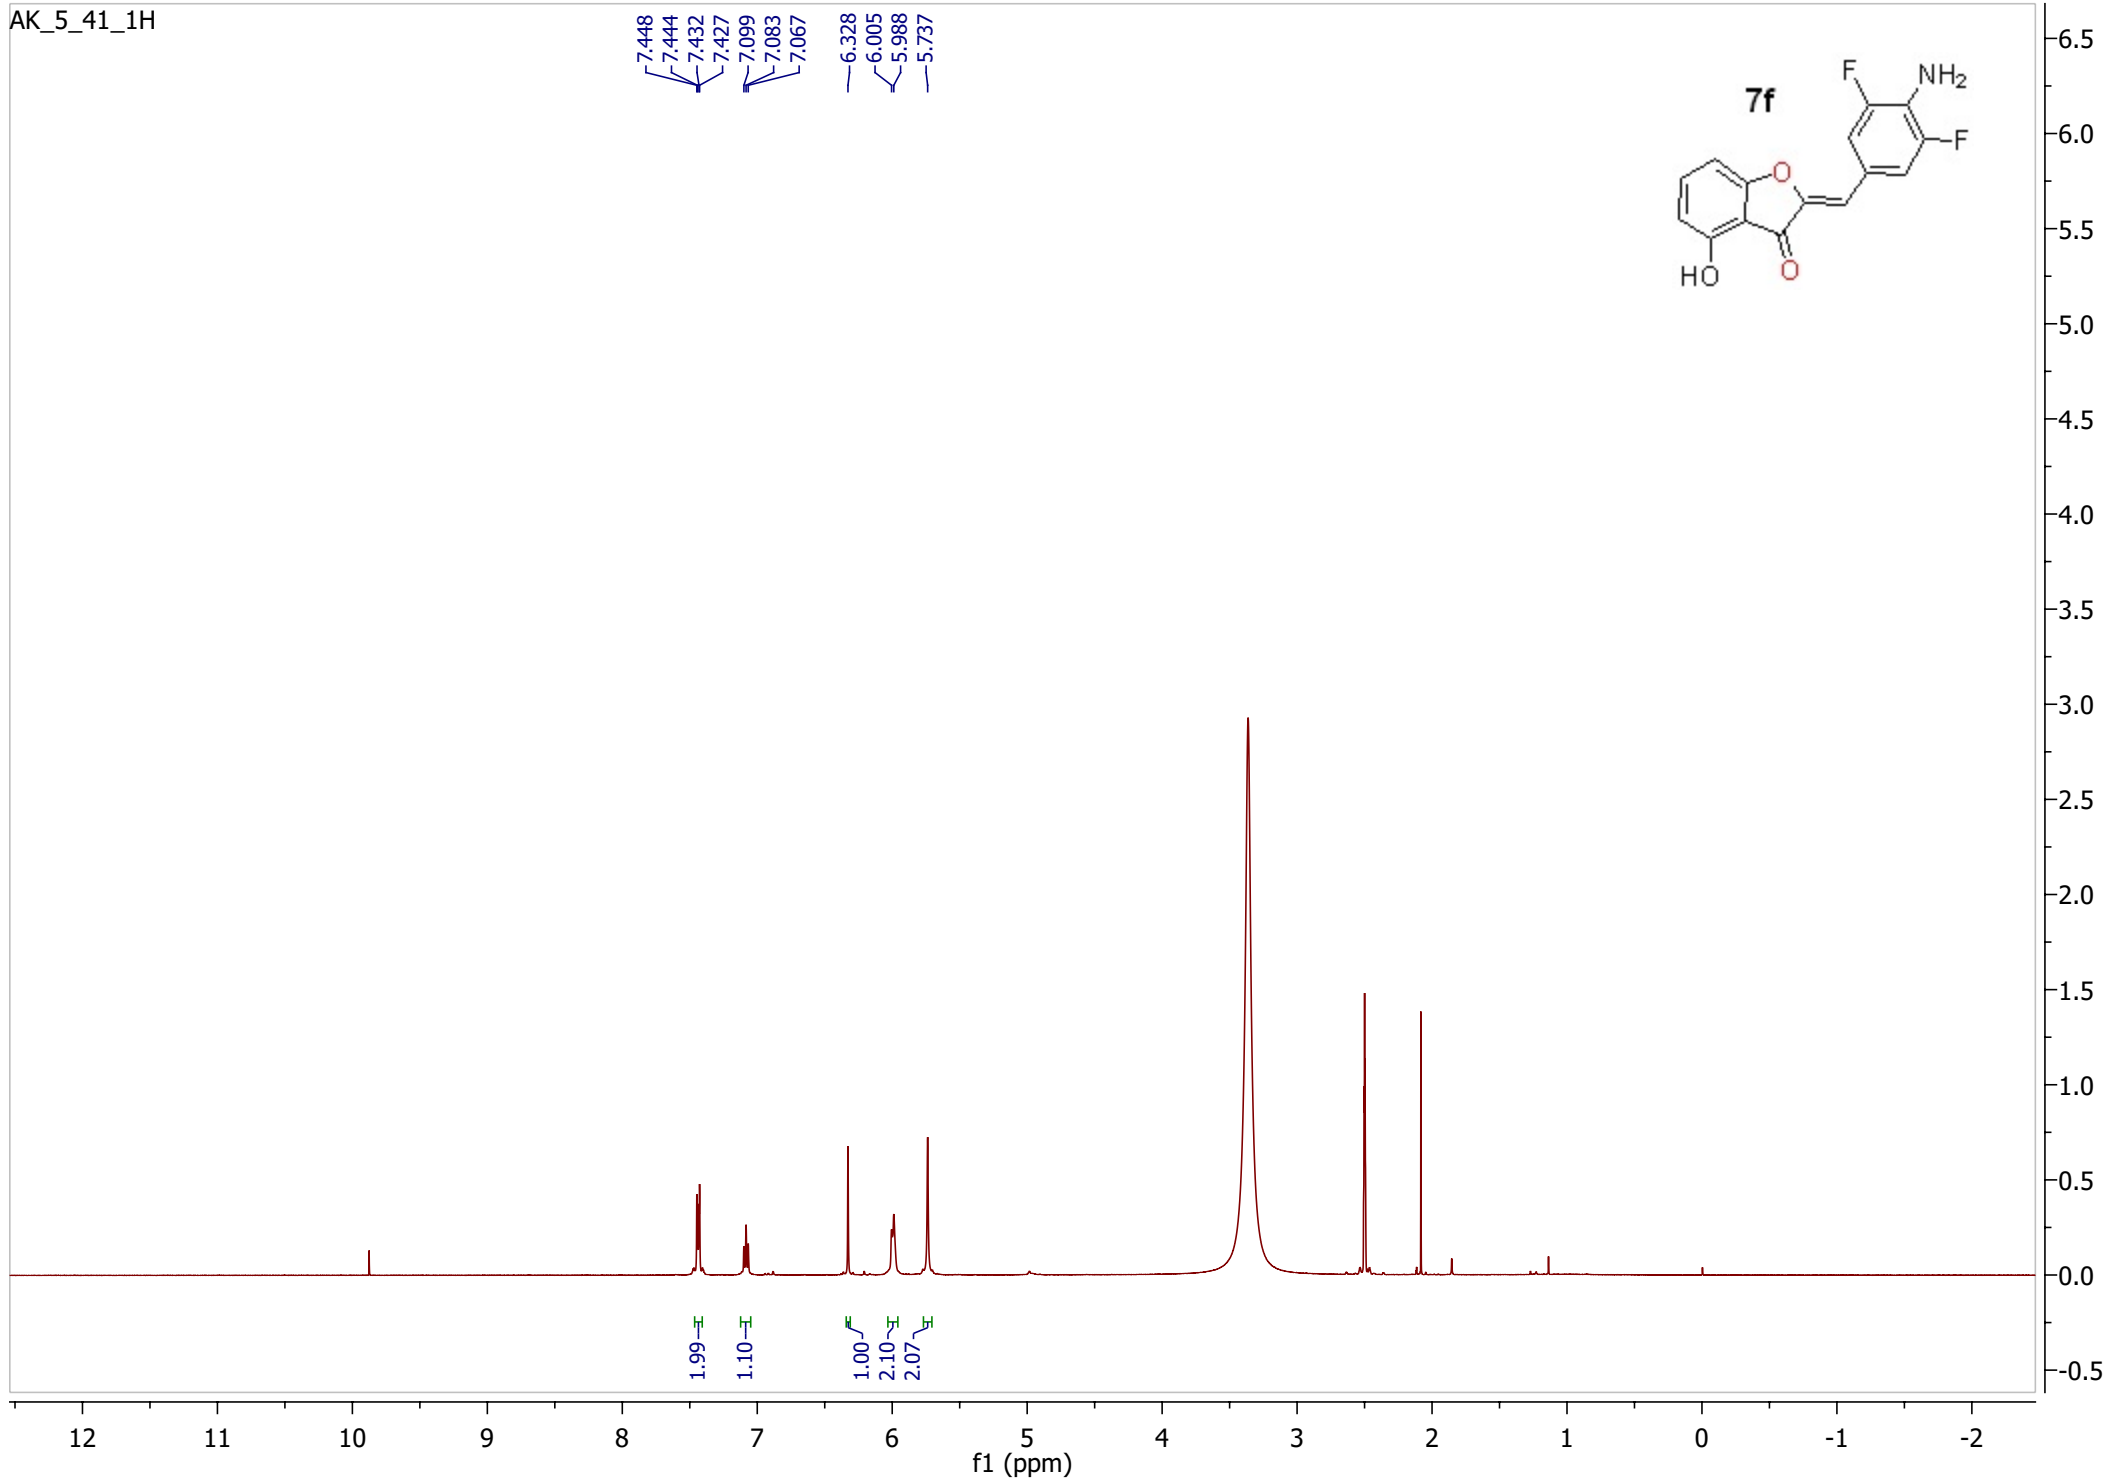

AK\_5\_41\_13C

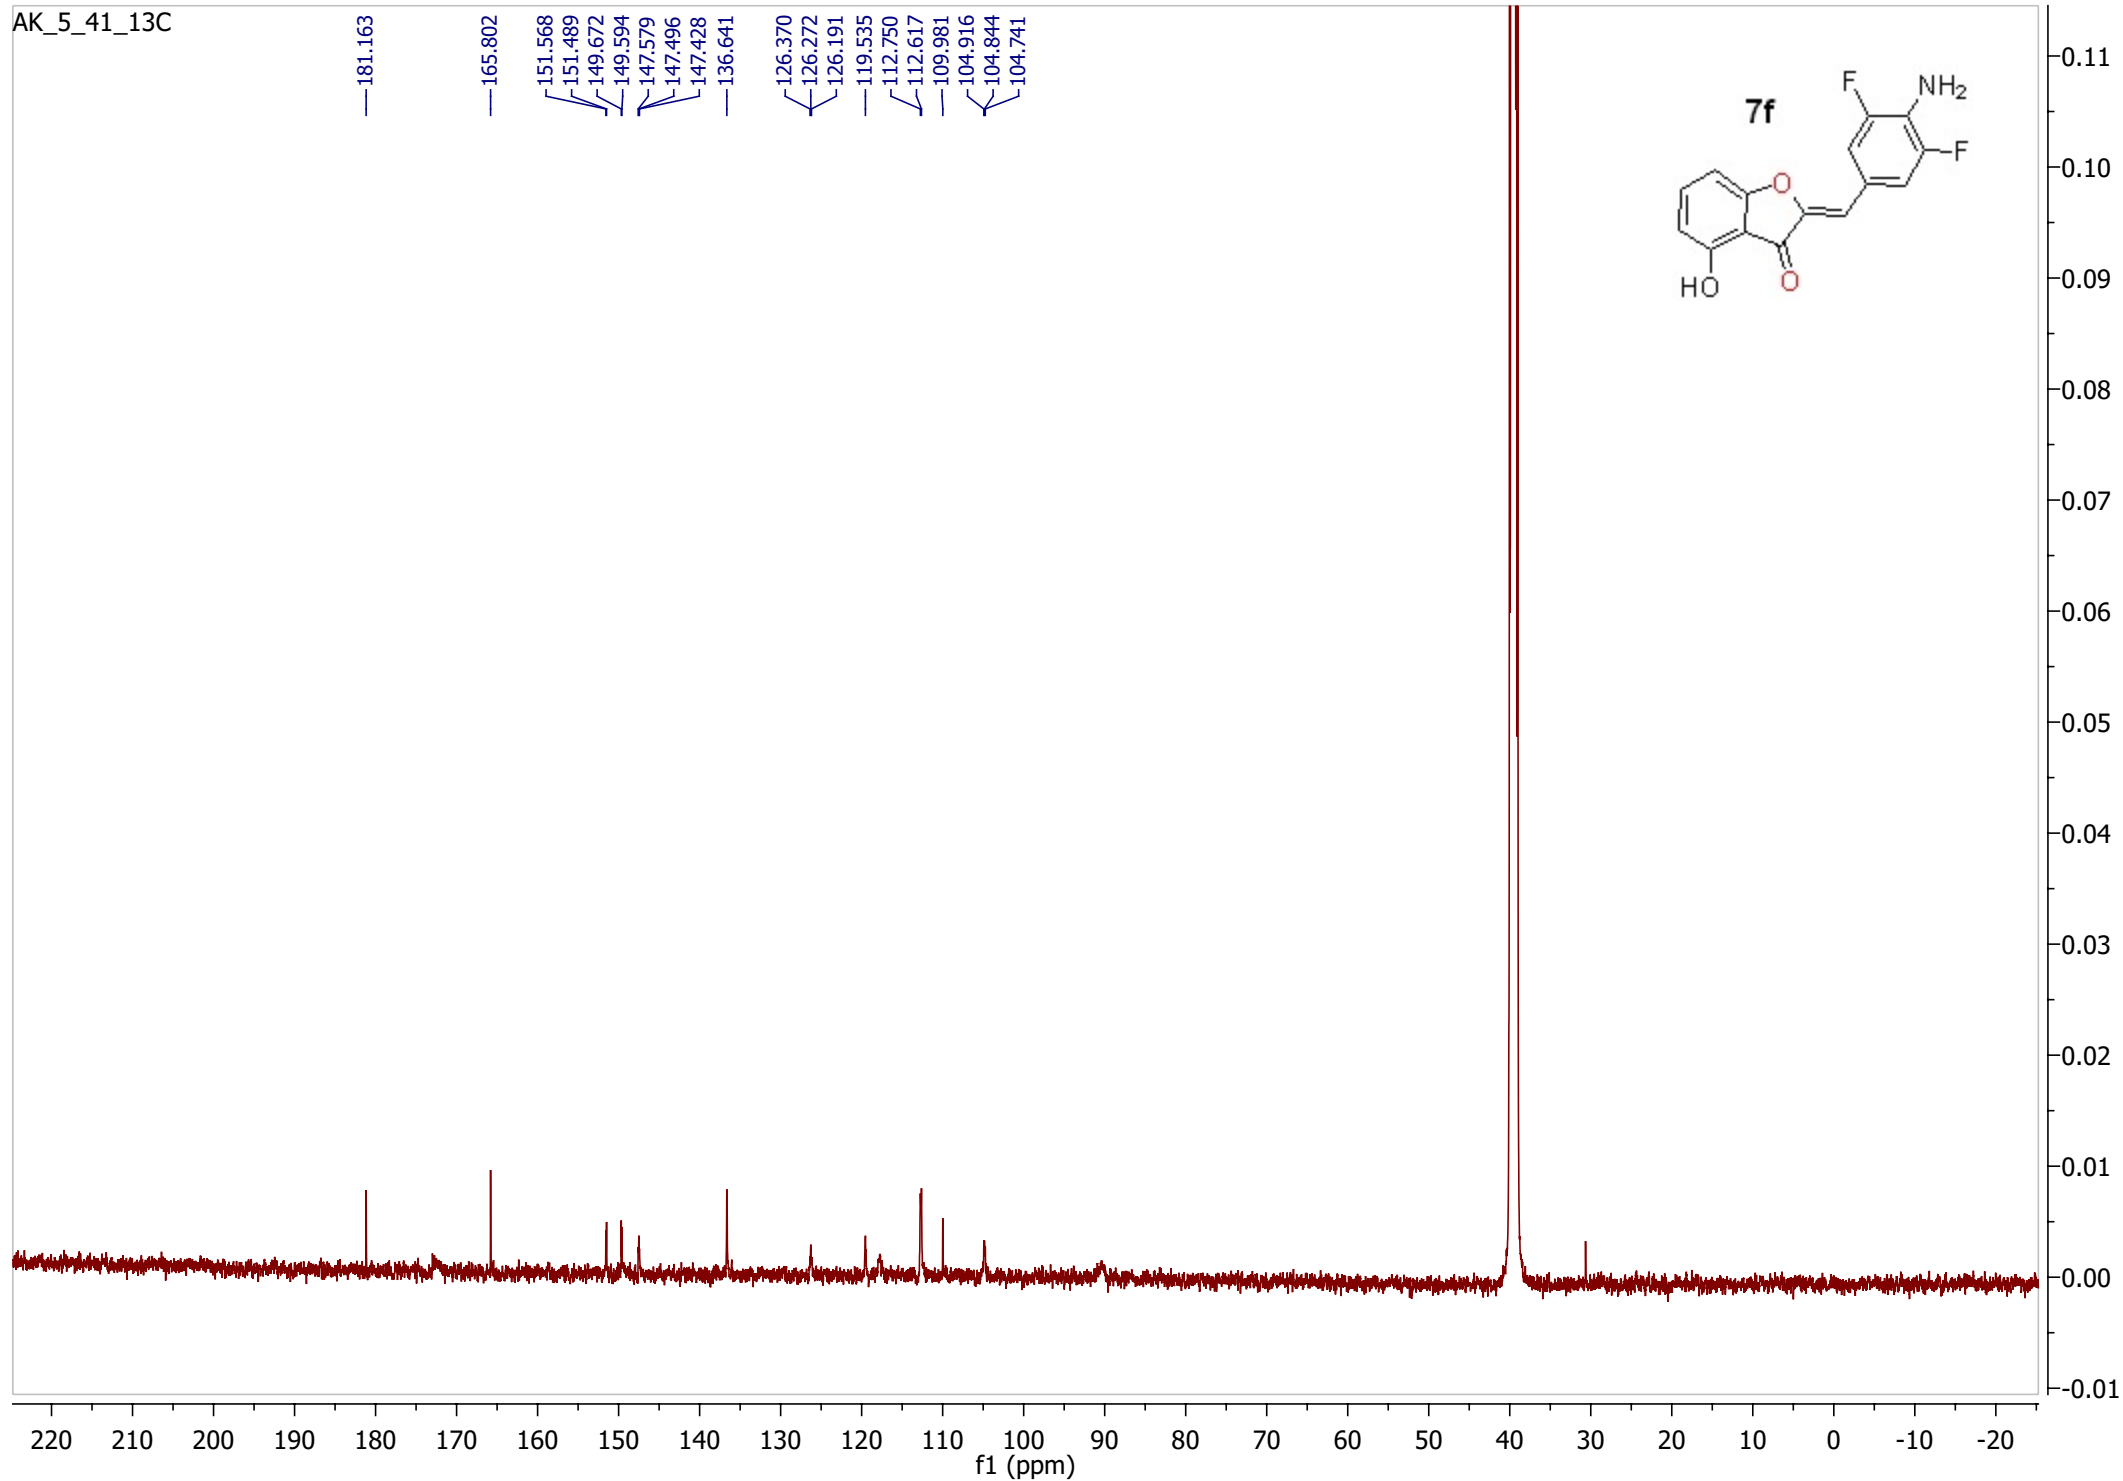

AK\_5\_43\_6g\_1H

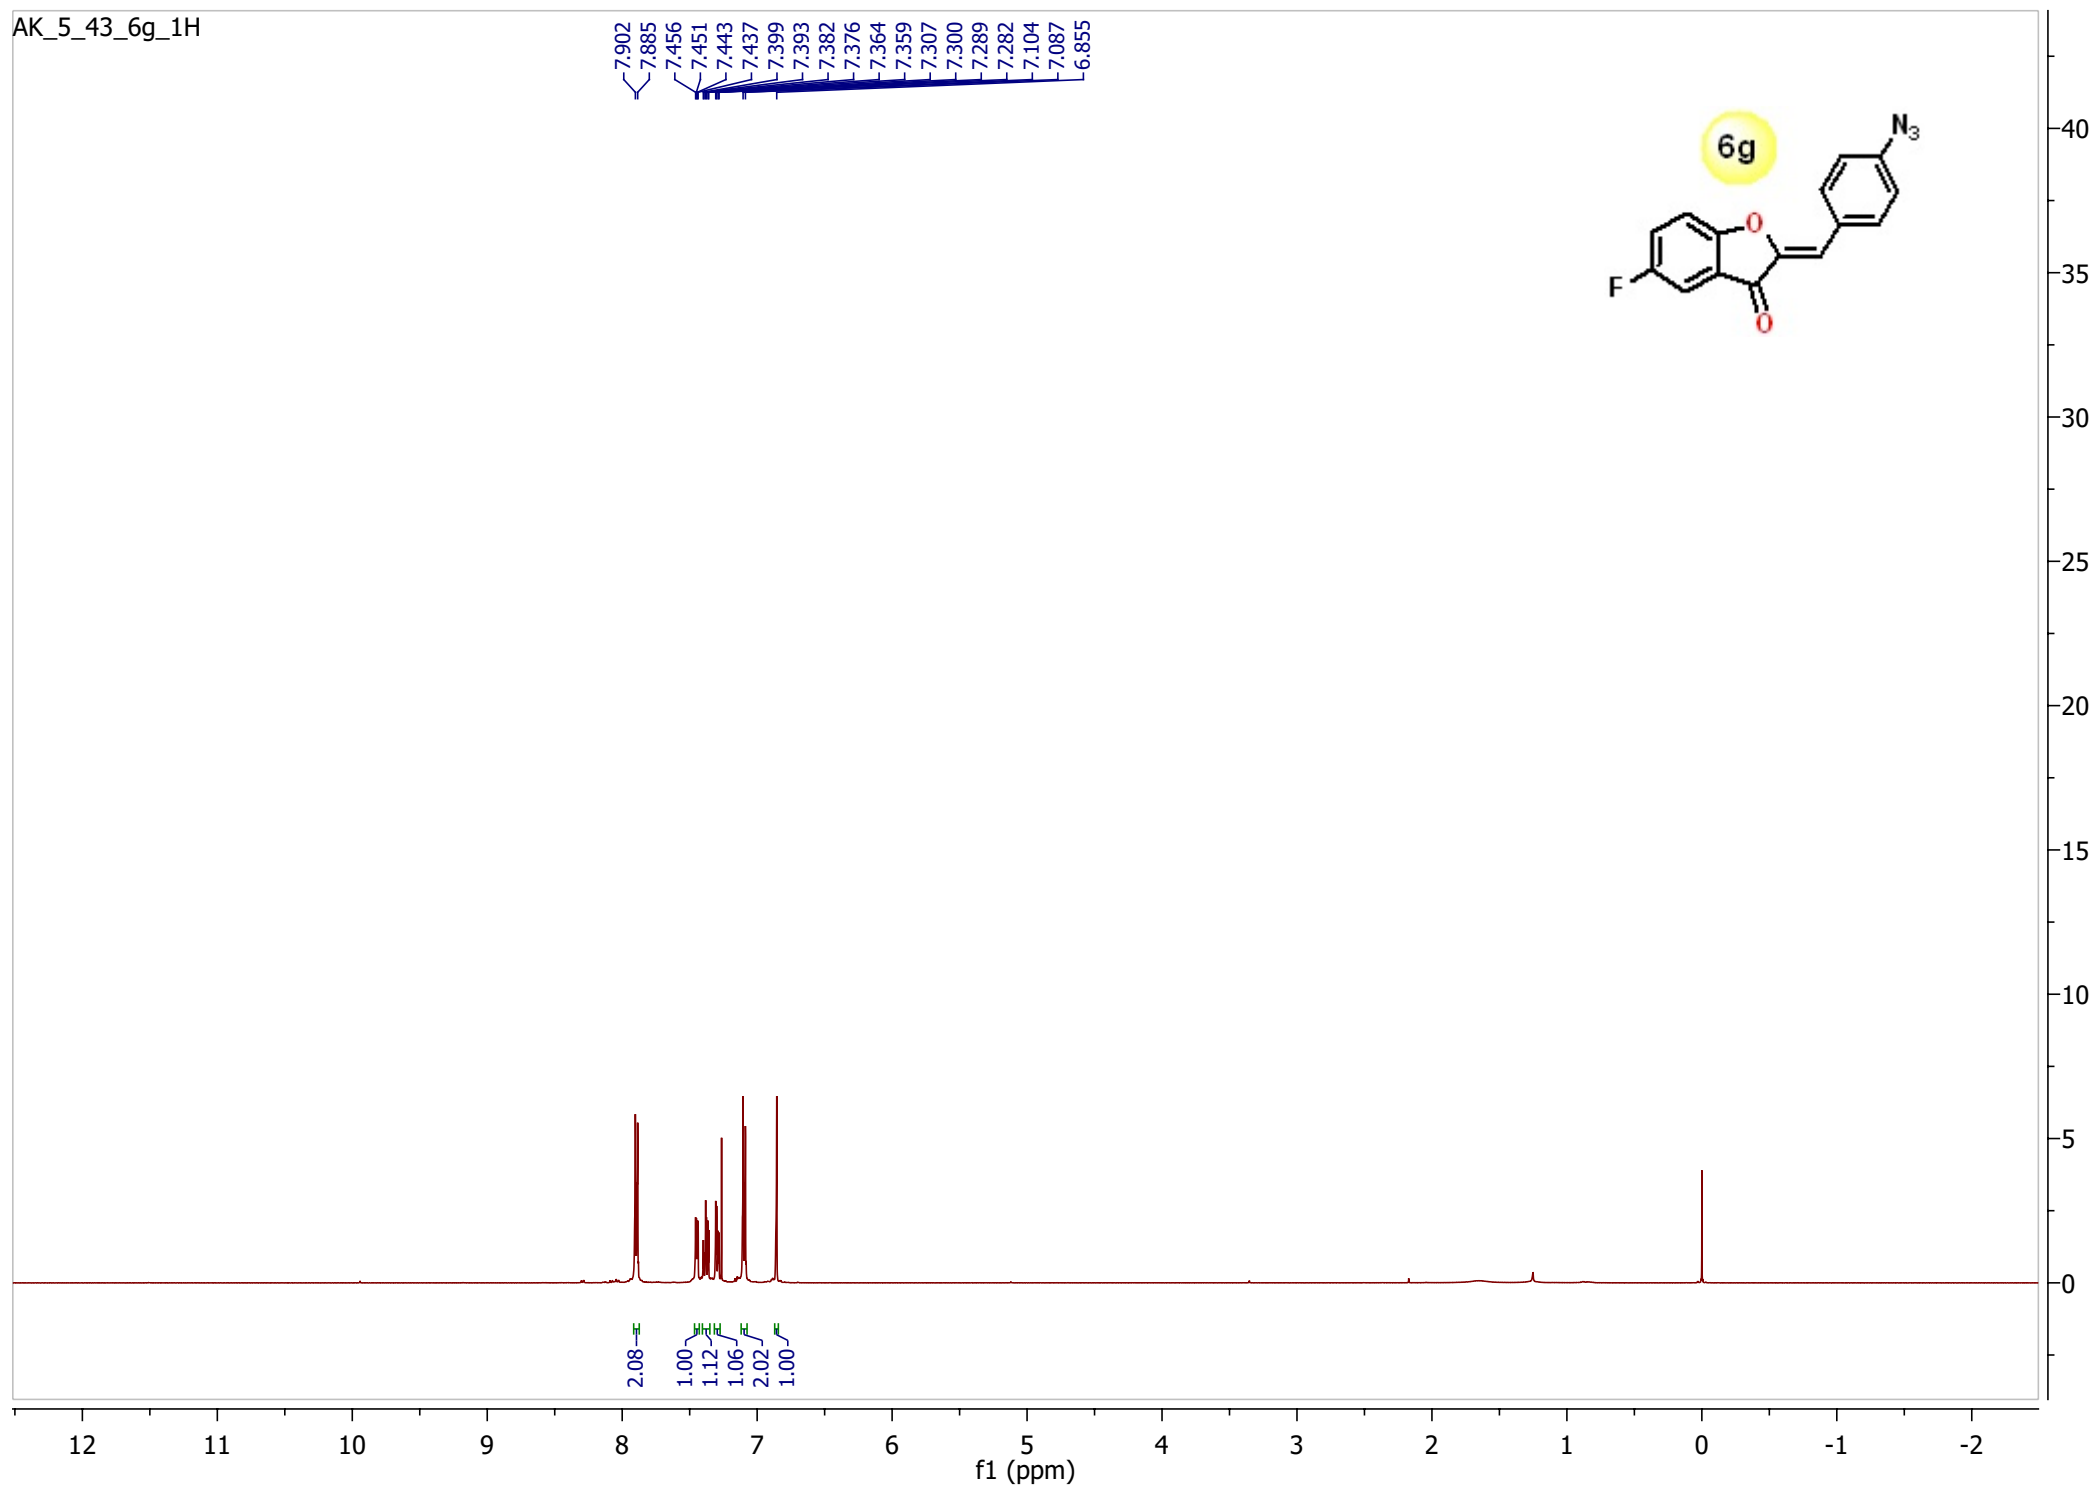

AK\_5\_43\_6g\_13C

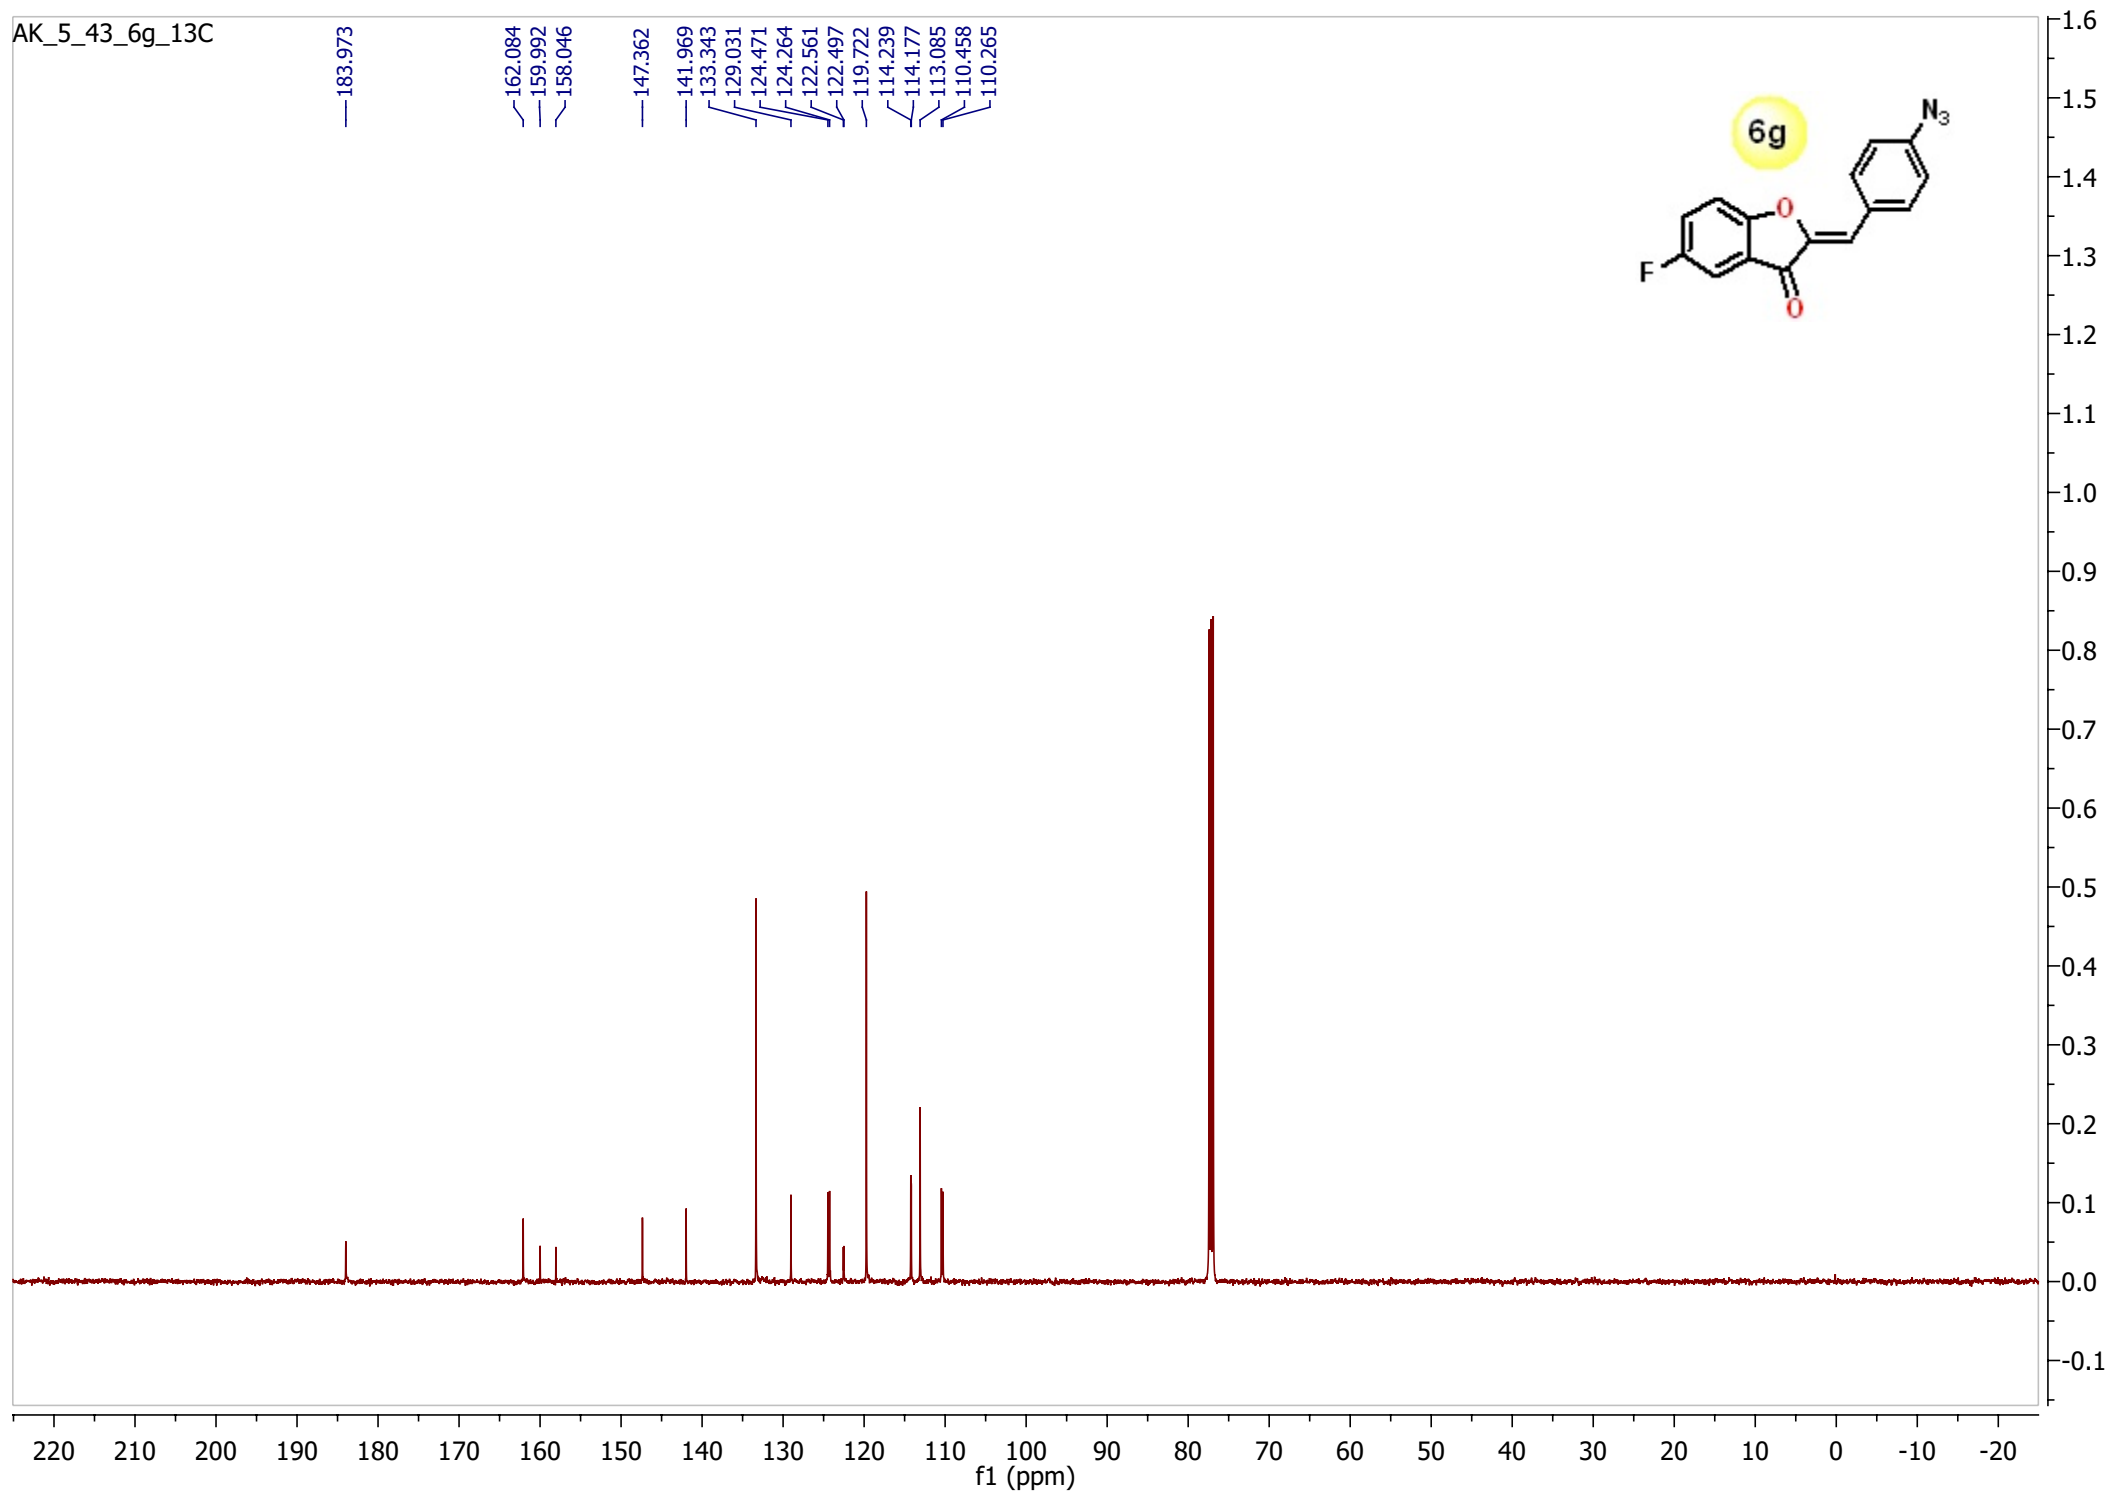



AK\_4\_76

7.744  
7.727  
7.642  
7.638  
7.625  
7.620  
7.607  
7.600  
7.591  
7.582  
7.577  
7.573  
7.563  
7.558  
6.877  
6.671  
6.654  
6.156

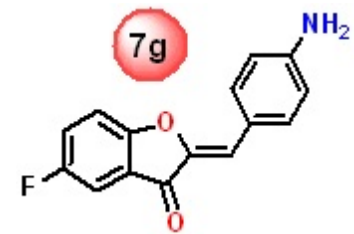

2.03  
1.98  
1.11  
1.00  
2.02  
1.80

12 11 10 9 8 7 6 5 4 3 2 1 0 -1 -2

f1 (ppm)

AK\_4\_76\_amine

181.643  
160.555  
159.771  
156.583  
152.048  
144.339  
134.237  
123.840  
123.496  
122.624  
122.517  
118.673  
116.236  
114.773  
114.666  
113.919  
109.482  
109.162

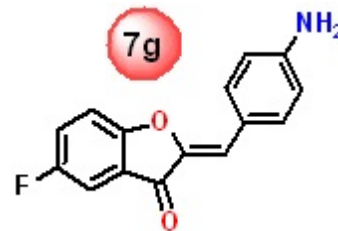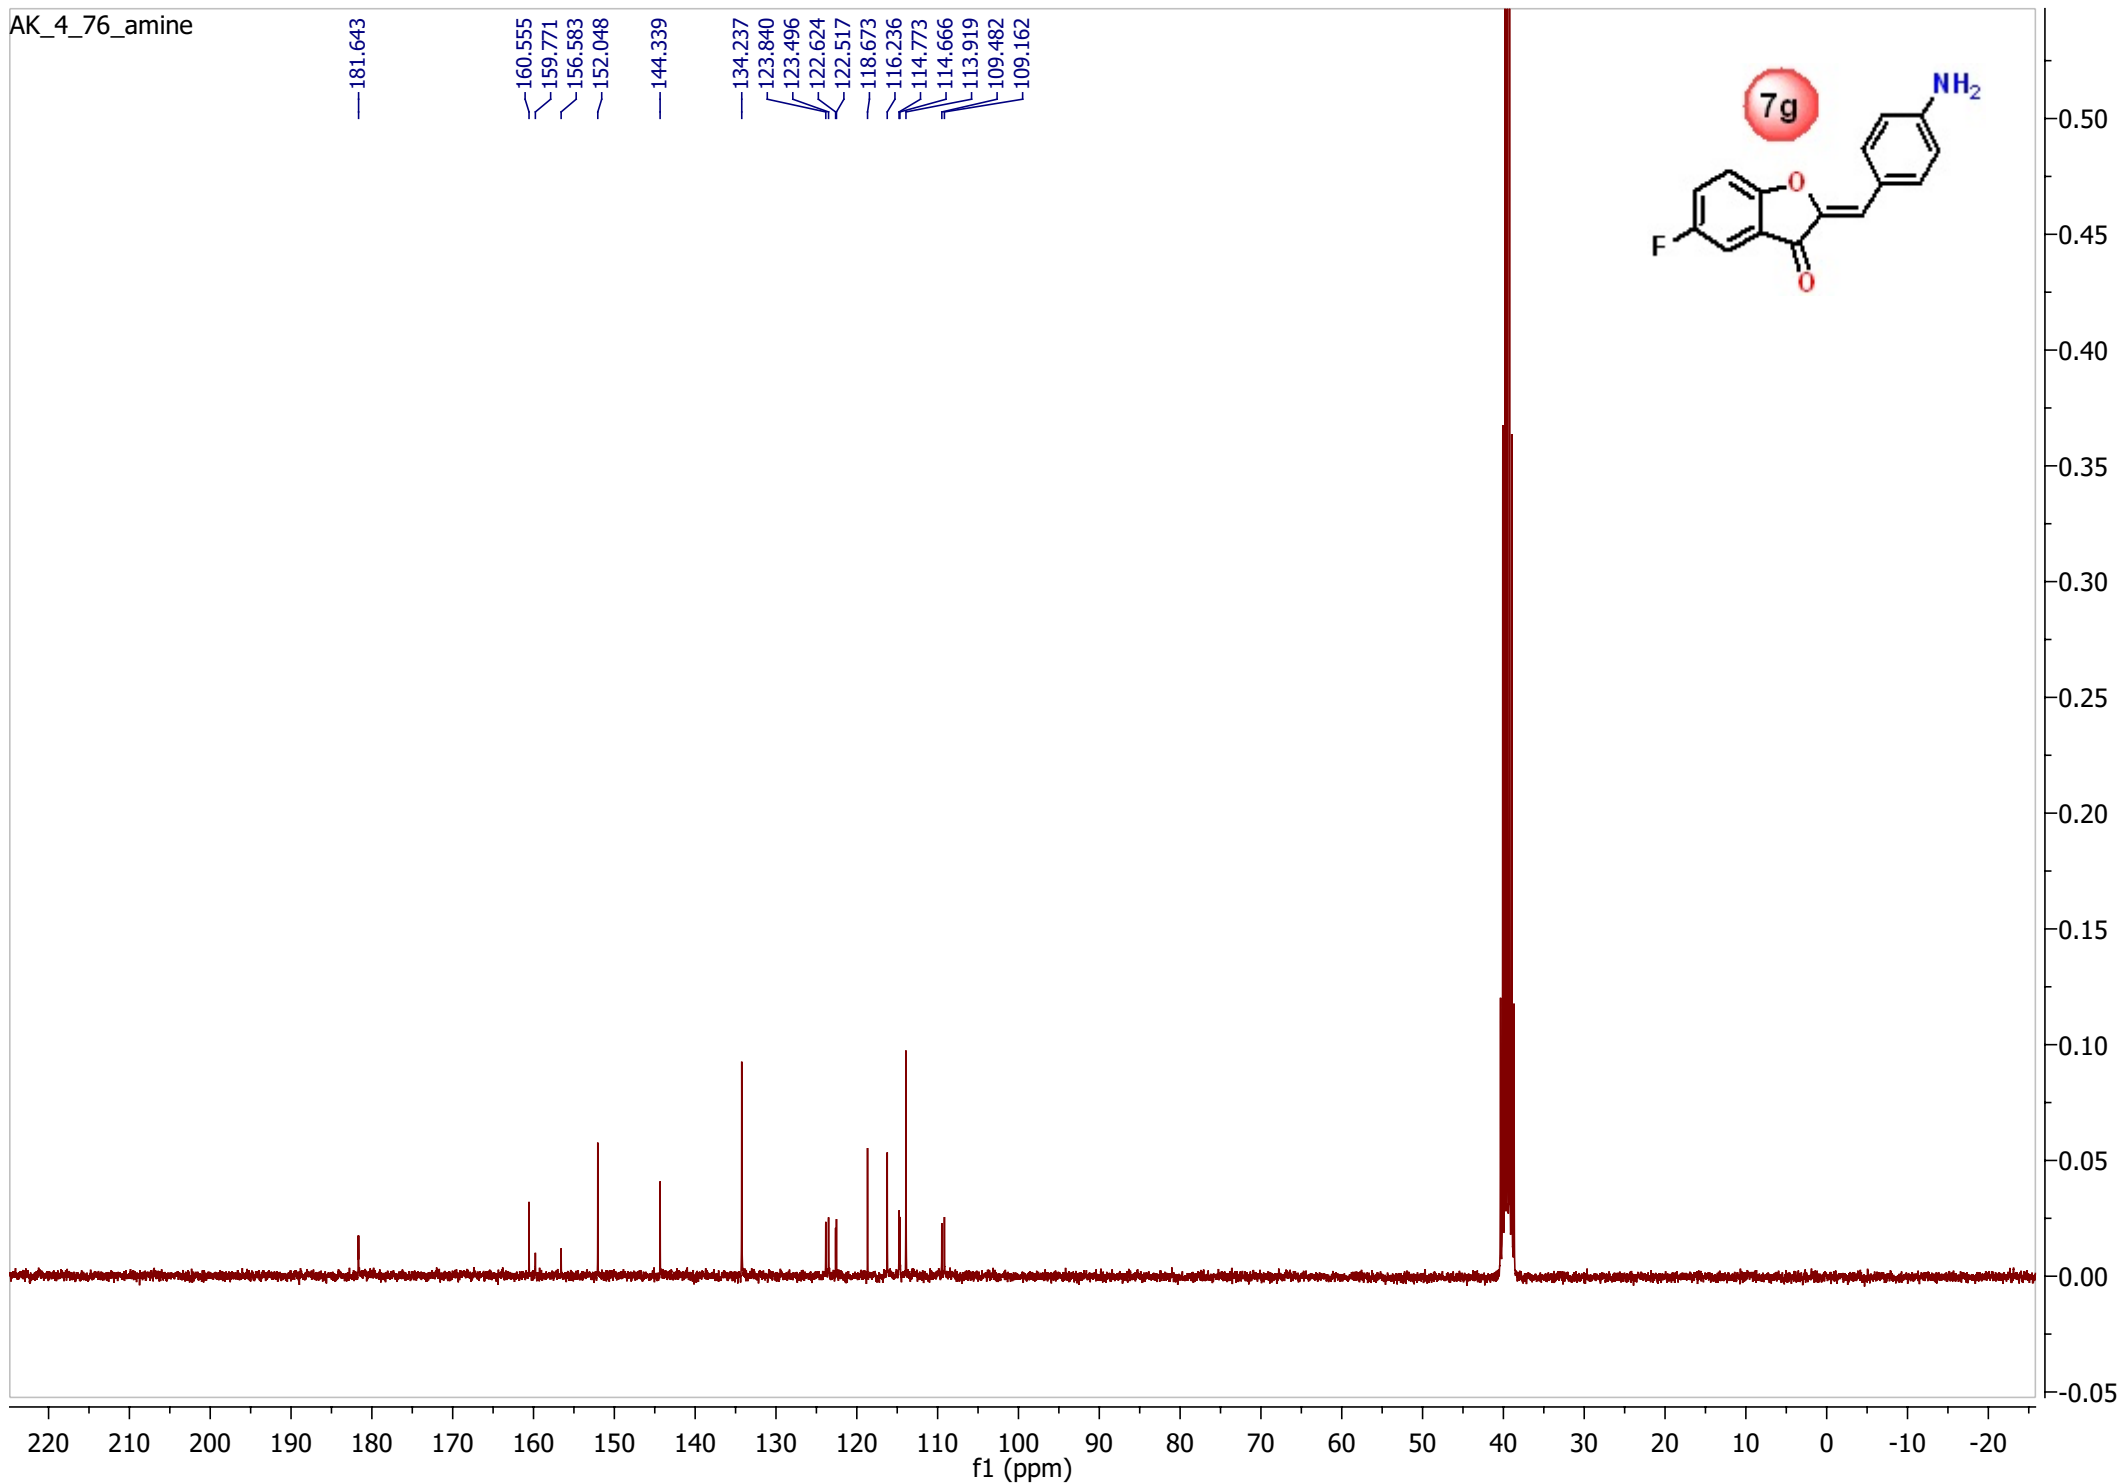

Supplement: d0ra08802a1.pdf [file d0ra08802a1.pdf]
